# Supplementary material for: Suv39h-catalyzed H3K9me3 is critical for euchromatic genome organization and the maintenance of gene transcription
Source: HighWire-hosted journal article supplement (doi:10.1101/gr.279119.124), 2024-05-06
Supplement: Supplemental_Table_1.xlsx [file Supplemental_Table_1.xlsx]

## Sheet: README
Supplementary Table 1: Details of in situ HiC libraries generated in this study.
Qualitative details of in situ HiC libraries generated in this study, including total paired end reads generated, percentages of libraries removed through filtration and values used for filtering artefacts

## Sheet: SuppTable1_LibraryStats
	Read.pairs							same.id				chimeras					Filtering
Library	total	Duplicates marked	% duplicates	filtered	% filtered	mapped	% mapped	dangling	% dangling	self.circle	% self.circles	total	mapped	multi	invalid	% invalid	min.inward	min.outward	max.frag	Chim.dist
Con Rep 1	141359404	2224710	0.015738	42197829	0.298514	97369079	0.688805	1418003	0.0100312	40179	0.000284233	95719087	62998566	44954860	703110	0.0156404	1000	2000	1000	800
Con Rep 2	242614013	4026337	0.0165956	74876139	0.308622	164721384	0.678944	2882047	0.0118791	68574	0.000282646	166822290	108309105	77814531	1331073	0.0171057	1000	2000	1000	800
DKO Rep 1	177407387	3326665	0.0187516	51697930	0.291408	123007549	0.693362	1519922	0.00856741	48935	0.000275834	116007285	76377013	53792283	774068	0.0143899	1000	2000	1000	800
DKO Rep 2	171220664	3188326	0.0186212	51810947	0.302598	116840989	0.6824	1718391	0.0100361	49131	0.000286946	117576178	76505089	54444270	901750	0.0165628	1000	2000	1000	800
