# Supplementary material for: Suv39h-catalyzed H3K9me3 is critical for euchromatic genome organization and the maintenance of gene transcription
Source: HighWire-hosted journal article supplement (doi:10.1101/gr.279119.124), 2024-05-06
Supplement: Supplemental_Table_2.xlsx [file Supplemental_Table_2.xlsx]

## Sheet: README
Supplementary Table 2: Differentially expressed genes between Suv39h1 and Suv39h2 double knockout (DKO) and control cells (CON)
All differentially expressed genes between DKO and CON with adjusted p-value <0.05 including EntrezID, gene symbol, fold change in expression and P-value

## Sheet: DKOvsCON_DE
seqnames	start	end	strand	gene_id	gene_type	gene_name	EntrezID	description	Synonyms	Length	logFC	AveExpr	t	P.Value	adj.P.Val
chr14	77904239	78002657	+	ENSMUSG00000022014.15	protein_coding	Epsti1	108670	epithelial stromal interaction 1 (breast)	2310046K10Rik|5033415K03Rik|BRESI1	2321	-4.81582	4.66636	-30.7933	1.14882e-13	9.69203e-10
chr13	24327404	24477377	+	ENSMUSG00000016756.17	protein_coding	Cmah	12763	cytidine monophospho-N-acetylneuraminic acid hydroxylase	-	10660	-2.99431	6.04517	-29.1496	2.04668e-13	9.69203e-10
chr2	79255426	79333123	+	ENSMUSG00000027009.18	protein_coding	Itga4	16401	integrin alpha 4	CD49D|Itga4B	13978	-3.03213	6.38521	-28.5828	2.63466e-13	9.69203e-10
chr2	71873224	71903858	+	ENSMUSG00000006494.11	protein_coding	Pdk1	228026	pyruvate dehydrogenase kinase, isoenzyme 1	B830012B01|D530020C15Rik	7779	-2.4117	7.0603	-21.3542	1.44393e-11	3.9838e-08
chr16	35694062	35769356	-	ENSMUSG00000022848.8	protein_coding	Slc49a4	224132	solute carrier family 49 member 4	Dirc2|RCC4	5395	-2.05769	5.42645	-19.4513	3.1782e-11	7.01492e-08
chr8	34807297	34819894	+	ENSMUSG00000031530.6	protein_coding	Dusp4	319520	dual specificity phosphatase 4	2700078F24Rik|AI844617|BB104621|E130306H24Rik|MKP2	2740	-2.81006	3.86459	-18.9501	4.63833e-11	8.53143e-08
chr2	92915098	92956058	+	ENSMUSG00000027220.2	protein_coding	Syt13	80976	synaptotagmin XIII	5730409J20Rik|AI549909|mKIAA1427	3761	1.61456	9.0594	18.4685	5.93473e-11	9.35653e-08
chr5	137729899	137741607	-	ENSMUSG00000045348.16	protein_coding	Nyap1	243300	neuronal tyrosine-phosphorylated phosphoinositide 3-kinase adaptor 1	6430598A04Rik	5244	-1.51103	6.56149	-17.7428	9.7353e-11	1.34299e-07
chr5	137650463	137684726	-	ENSMUSG00000029722.15	protein_coding	Agfg2	231801	ArfGAP with FG repeats 2	A630095P14Rik|Hrbl|RAB-R|RABR	3822	-1.38519	7.793	-17.2194	1.40614e-10	1.72424e-07
chr12	59095799	59191583	+	ENSMUSG00000021000.17	protein_coding	Mia2	338320	MIA SH3 domain ER export factor 2	Ctage5|D12Bwg0579e|Mea6|Mgea|Mgea6	11239	-1.39907	6.7135	-16.3268	2.71801e-10	2.86608e-07
chr14	77820681	77875125	-	ENSMUSG00000022013.4	protein_coding	Dnajc15	66148	DnaJ heat shock protein family (Hsp40) member C15	1110003P16Rik|Dnajd1	6513	-2.70123	5.41252	-17.2012	2.85673e-10	2.86608e-07
chr12	81026808	81186414	+	ENSMUSG00000021136.13	protein_coding	Smoc1	64075	SPARC related modular calcium binding 1	2600002F22Rik|AI848508|SRG	3496	-1.91687	5.15815	-15.4863	5.33386e-10	4.70495e-07
chr1	173630917	173647928	+	ENSMUSG00000043263.13	protein_coding	Ifi209	236312	interferon activated gene 209	4930422C14|AI447904|Ifix|Pyhin-1|Pyhin1	3547	-4.11422	3.19797	-15.5932	5.74815e-10	4.70495e-07
chr1	193091104	193130272	-	ENSMUSG00000016181.9	protein_coding	Diexf	NA	NA	NA	6530	1.33624	8.02762	15.3141	5.96858e-10	4.70495e-07
chr3	14886273	14900770	+	ENSMUSG00000027562.12	protein_coding	Car2	12349	carbonic anhydrase 2	AI131712|CAII|Ca2|Car-2|Ltw-5|Lvtw-5	2422	-4.11801	2.47023	-15.2239	7.68754e-10	5.65598e-07
chr2	101950203	102186385	-	ENSMUSG00000048058.17	protein_coding	Ldlrad3	241576	low density lipoprotein receptor class A domain containing 3	6430500P08|AI194318|Lrad3	6023	1.27463	7.21367	14.8067	9.00531e-10	5.97048e-07
chr11	97663414	97685463	+	ENSMUSG00000038437.11	protein_coding	Mllt6	246198	myeloid/lymphoid or mixed-lineage leukemia; translocated to, 6	AI315037|Af17	7451	-1.6215	6.02557	-14.7953	9.197e-10	5.97048e-07
chr4	154316125	154636873	-	ENSMUSG00000039410.16	protein_coding	Prdm16	70673	PR domain containing 16	5730557K01Rik|csp1|mel1	9321	-7.68821	-1.73206	-15.0929	1.01386e-09	6.21606e-07
chr3	51660360	51682677	+	ENSMUSG00000074604.9	protein_coding	Mgst2	211666	microsomal glutathione S-transferase 2	GST2|MGST-II	3703	-2.13207	4.93552	-14.5722	1.14409e-09	6.64538e-07
chr6	52201754	52204587	-	ENSMUSG00000038253.6	protein_coding	Hoxa5	15402	homeobox A5	Hox-1.3	1877	-7.3798	-1.90587	-14.0298	2.4519e-09	1.2561e-06
chr15	42424723	42676977	-	ENSMUSG00000022309.9	protein_coding	Angpt1	11600	angiopoietin 1	1110046O21Rik|Ang-1|Ang1	5205	-3.91502	2.49681	-13.8217	2.4721e-09	1.2561e-06
chr13	34126748	34130466	-	ENSMUSG00000045136.6	protein_coding	Tubb2b	73710	tubulin, beta 2B class IIB	2410129E14Rik|brdp	2294	-1.60635	6.86462	-13.9138	2.504e-09	1.2561e-06
chr11	35121224	35708507	+	ENSMUSG00000056427.10	protein_coding	Slit3	20564	slit guidance ligand 3	Slil2|Slit1|b2b2362.1Clo	6067	-7.95743	-1.59211	-13.8013	3.05239e-09	1.46462e-06
chr3	106759921	106790149	-	ENSMUSG00000040747.9	protein_coding	Cd53	12508	CD53 antigen	AI323659|Ox-44|Tspan25	1742	-2.62169	3.47532	-13.3101	3.5516e-09	1.63314e-06
chrX	8061171	8074760	-	ENSMUSG00000039231.18	protein_coding	Suv39h1	20937	suppressor of variegation 3-9 1	AI852103|AL022883|DXHXS7466e|H3-K9-HMTase 1|KMT1A|mIS6	5270	-8.45865	2.16555	-14.0843	4.03921e-09	1.78307e-06
chr10	19356533	19358604	+	ENSMUSG00000045591.6	protein_coding	Olig3	94222	oligodendrocyte transcription factor 3	Bhlhb7|bHLHe20|oligo3	2072	2.65384	4.27185	13.6122	4.35427e-09	1.84822e-06
chr7	109893780	109960470	-	ENSMUSG00000035901.14	protein_coding	Dennd5a	19347	DENN/MADD domain containing 5A	1500012B19Rik|AJ245569|AW496491|ORF37|Rab6ip1|mKIAA1091	8677	-1.62026	4.76192	-12.8993	4.8615e-09	1.98709e-06
chr8	15011025	15033333	+	ENSMUSG00000055675.6	protein_coding	Kbtbd11	74901	kelch repeat and BTB (POZ) domain containing 11	2900016B01Rik|4930465M17Rik|mKIAA0711	7137	-1.43439	5.01878	-12.7776	5.40829e-09	2.13164e-06
chr9	15709738	15743361	+	ENSMUSG00000043885.14	protein_coding	Slc36a4	234967	solute carrier family 36 (proton/amino acid symporter), member 4	6330573I15Rik|PAT4	6540	-5.59374	1.0637	-12.6732	7.80124e-09	2.96878e-06
chr9	110865711	110880113	-	ENSMUSG00000049555.10	protein_coding	Tmie	20776	transmembrane inner ear	5131400L21Rik|Mm.87012|sr	3094	-3.63484	3.13969	-12.7089	8.47684e-09	3.11835e-06
chr1	173350879	173466040	+	ENSMUSG00000037860.15	protein_coding	Aim2	383619	absent in melanoma 2	Gm1313|Ifi210	3501	-5.7822	0.394072	-12.482	9.45284e-09	3.21661e-06
chr13	75089826	75134861	+	ENSMUSG00000021587.5	protein_coding	Pcsk1	18548	proprotein convertase subtilisin/kexin type 1	Nec-1|Nec1|PC1|PC3|Phpp-1|SPC3	5604	-8.68778	0.589038	-12.7604	9.51699e-09	3.21661e-06
chr11	71749920	71789647	+	ENSMUSG00000020811.16	protein_coding	Wscd1	216881	WSC domain containing 1	mKIAA0523	4287	-4.47581	1.41244	-12.3753	9.75479e-09	3.21661e-06
chr8	104348191	104395807	-	ENSMUSG00000096188.1	protein_coding	Cmtm4	97487	CKLF-like MARVEL transmembrane domain containing 4	Cklfsf4|D19397|Gm9853	7734	-2.05445	3.63607	-12.1807	9.90982e-09	3.21661e-06
chr1	171588624	171607410	-	ENSMUSG00000004707.14	protein_coding	Ly9	17085	lymphocyte antigen 9	AI893573|CD229|Lgp100|Ly-9|SLAMF3|T100	3307	-1.30999	5.55734	-12.0917	1.04322e-08	3.28942e-06
chrY	1260771	1286629	-	ENSMUSG00000069045.11	protein_coding	Ddx3y	26900	DEAD (Asp-Glu-Ala-Asp) box polypeptide 3, Y-linked	8030469F12Rik|D1Pas1-rs1|Dby	5199	-8.80858	2.55741	-14.0662	1.28926e-08	3.95231e-06
chr13	12472632	12520438	-	ENSMUSG00000095105.2	protein_coding	Edaradd	171211	EDAR (ectodysplasin-A receptor)-associated death domain	1810032E07Rik|5830469M23Rik|A630043P06|cr	6668	1.26403	6.0841	11.7394	1.4814e-08	4.41859e-06
chr7	110308013	110614922	-	ENSMUSG00000038371.15	protein_coding	Sbf2	319934	SET binding factor 2	4833411B01Rik|AA414977|AI317167|B430219L04Rik|Mtmr13|mMTMH1	14783	-2.8203	2.32397	-11.5113	2.05539e-08	5.86135e-06
chr11	77470485	77489678	-	ENSMUSG00000037907.16	protein_coding	Ankrd13b	268445	ankyrin repeat domain 13b	AW124583|B930093C12Rik	3839	-2.29375	2.78647	-11.465	2.07134e-08	5.86135e-06
chr8	90247040	90348343	-	ENSMUSG00000043668.13	protein_coding	Tox3	244579	TOX high mobility group box family member 3	500-9|BC052044|C230068E13|CAGF9|Tnrc9	3356	-8.33113	-1.42199	-11.9425	2.1612e-08	5.96274e-06
chr15	93499114	93595891	-	ENSMUSG00000036158.12	protein_coding	Prickle1	106042	prickle planar cell polarity protein 1	1110058P22Rik|AW215793|Prickle|b2b019Clo|mpk1	4345	-3.12338	3.45737	-11.7954	2.45395e-08	6.43207e-06
chr13	73679745	73704865	-	ENSMUSG00000021565.16	protein_coding	Slc6a19	74338	solute carrier family 6 (neurotransmitter transporter), member 19	4632401C08Rik|B<0>AT1	5006	-2.94363	5.58184	-15.2821	2.46113e-08	6.43207e-06
chr12	112720455	112746592	+	ENSMUSG00000072825.11	protein_coding	Cep170b	217882	centrosomal protein 170B	AI466840|AW555464|Kiaa0284|mKIAA0284	8002	-2.98177	1.94107	-11.3172	2.54596e-08	6.43207e-06
chr7	16175090	16186504	+	ENSMUSG00000041420.18	protein_coding	Meis3	17537	Meis homeobox 3	AI573393|Mrg2	3173	-1.77746	3.68189	-11.2274	2.56444e-08	6.43207e-06
chr19	8706882	8723369	-	ENSMUSG00000010095.13	protein_coding	Slc3a2	17254	solute carrier family 3 (activators of dibasic and neutral amino acid transport), member 2	4F2|4F2HC|AI314110|Cd98|Ly-10|Ly-m10|Ly10|Mdu1|Mgp-2hc|NACAE	3529	-1.08494	6.30618	-10.9872	3.22623e-08	7.91215e-06
chr7	105371211	105400054	-	ENSMUSG00000044465.19	protein_coding	Fam160a2	74349	family with sequence similarity 160, member A2	4632419K20Rik|6530415H11Rik|FHIP	11834	-1.73231	3.93423	-10.9763	3.33844e-08	8.00936e-06
chr9	45138395	45154152	+	ENSMUSG00000046480.6	protein_coding	Scn4b	399548	sodium channel, type IV, beta	Gm1471	4982	1.25895	7.4485	11.1092	3.47841e-08	8.16761e-06
chr1	59763400	59879014	+	ENSMUSG00000067336.6	protein_coding	Bmpr2	12168	bone morphogenetic protein receptor, type II (serine/threonine kinase)	2610024H22Rik|AL117858|AW546137|BB189135|BMP-2|BMPR-2|BMPR-II|BMPRII|BRK-3|Gm20272	17983	1.80747	4.15617	10.9171	3.57254e-08	8.21387e-06
chrX	107255878	107296769	+	ENSMUSG00000073008.11	protein_coding	Gpr174	213439	G protein-coupled receptor 174	Gm376|Lypsr3	5402	-1.69078	3.73182	-10.7854	4.09222e-08	9.21669e-06
chr5	104813169	104860070	-	ENSMUSG00000072774.10	protein_coding	Zfp951	626391	zinc finger protein 951	C230055K05Rik|Gm38611	4730	-5.99372	-1.52446	-10.9051	4.76e-08	1.00957e-05
chr2	34941750	34961772	-	ENSMUSG00000026875.14	protein_coding	Traf1	22029	TNF receptor-associated factor 1	4732496E14Rik	8819	-1.81045	4.14725	-10.643	4.81271e-08	1.00957e-05
chr2	101638282	101649501	-	ENSMUSG00000061311.6	protein_coding	Rag1	19373	recombination activating 1	Rag-1	6608	-0.956292	13.184	-10.6146	4.82414e-08	1.00957e-05
chr4	133847290	133887797	-	ENSMUSG00000003644.17	protein_coding	Rps6ka1	20111	ribosomal protein S6 kinase polypeptide 1	Mapkapk-1a|Rsk|Rsk-1|Rsk1|S6K-alpha-1|p90-Rsk1|p90Rsk1|p90S6K|p90rsk	4258	-1.09545	5.58462	-10.6115	4.84844e-08	1.00957e-05
chr18	57878678	57946821	+	ENSMUSG00000024597.11	protein_coding	Slc12a2	20496	solute carrier family 12, member 2	9330166H04Rik|Nkcc1|mBSC2|sy-ns	10920	-2.48918	2.0542	-10.6117	5.22345e-08	1.06752e-05
chr3	49892526	50443614	-	ENSMUSG00000027737.10	protein_coding	Slc7a11	26570	solute carrier family 7 (cationic amino acid transporter, y+ system), member 11	9930009M05Rik|AI451155|sut|xCT	13922	-7.43972	3.87175	-15.1496	5.35299e-08	1.07257e-05
chr6	108213096	108551109	+	ENSMUSG00000030102.11	protein_coding	Itpr1	16438	inositol 1,4,5-trisphosphate receptor 1	D6Pas2|Gm10429|IP3R 1|IP3R1|InsP3R|Ip3r|Itpr-1|P400|Pcp-1|Pcp1|insP3R1|opt|wblo	18319	-1.02047	7.56615	-10.5058	5.44254e-08	1.07257e-05
chr5	35893319	36003923	+	ENSMUSG00000029094.12	protein_coding	Afap1	70292	actin filament associated protein 1	2600003E23Rik|9630044L16Rik|AI848729|Afap|mKIAA3018	12651	-1.35629	5.02487	-10.4048	6.13413e-08	1.18765e-05
chr5	24319589	24351604	-	ENSMUSG00000038319.14	protein_coding	Kcnh2	16511	potassium voltage-gated channel, subfamily H (eag-related), member 2	AI326795|ERG1|LQT|Lqt2|M-erg|Merg1|merg1a|merg1b	4845	-0.959283	7.2768	-10.3163	6.7203e-08	1.26275e-05
chr8	12757014	12868728	+	ENSMUSG00000031441.15	protein_coding	Atp11a	50770	ATPase, class VI, type 11A	4930558F19Rik|AU040868|Atpc1h|Ih	11150	-3.27467	3.94434	-12.2847	6.75083e-08	1.26275e-05
chr5	72755716	72868483	-	ENSMUSG00000029217.16	protein_coding	Tec	21682	tec protein tyrosine kinase	-	3744	-1.22299	5.17103	-10.1742	7.92478e-08	1.43458e-05
chr4	135120652	135177990	+	ENSMUSG00000070691.10	protein_coding	Runx3	12399	runt related transcription factor 3	AML2|Cbfa3|Pebp2a3	5003	-1.97764	3.37518	-10.1964	8.00923e-08	1.43458e-05
chrX	107088492	107104974	+	ENSMUSG00000050921.12	protein_coding	P2ry10	78826	purinergic receptor P2Y, G-protein coupled 10	5830408N17Rik|Lypsr2|P2Y10	2982	-1.05759	7.41571	-10.146	8.15811e-08	1.43458e-05
chr7	72077830	72306608	-	ENSMUSG00000032776.9	protein_coding	Mctp2	244049	multiple C2 domains, transmembrane 2	Gm489	12351	-1.90553	3.40556	-10.1727	8.18942e-08	1.43458e-05
chr6	52214491	52221854	-	ENSMUSG00000038236.8	protein_coding	Hoxa7	15404	homeobox A7	AV118143|Hox-1.1|M6	2876	-5.84341	0.0833646	-10.3171	9.04476e-08	1.54783e-05
chr3	37639947	37644598	+	ENSMUSG00000037211.12	protein_coding	Spry1	24063	sprouty RTK signaling antagonist 1	sprouty1|spry-1	2906	1.89133	3.11064	10.0704	9.19731e-08	1.54783e-05
chr8	81342556	82127914	+	ENSMUSG00000037940.17	protein_coding	Inpp4b	234515	inositol polyphosphate-4-phosphatase, type II	E130107I17Rik	13066	-1.48048	4.37036	-10.0457	9.25671e-08	1.54783e-05
chr12	108554720	108688516	+	ENSMUSG00000021262.15	protein_coding	Evl	14026	Ena-vasodilator stimulated phosphoprotein	AI528774|b2b2600Clo	2940	-1.69988	4.3584	-9.98164	1.00999e-07	1.66361e-05
chr16	4710059	4719356	-	ENSMUSG00000063445.14	protein_coding	Nmral1	67824	NmrA-like family domain containing 1	1110025F24Rik|AI256624	3891	-4.15358	1.89745	-10.2386	1.04065e-07	1.68892e-05
chr11	89073841	89093040	+	ENSMUSG00000072553.10	protein_coding	Gm525	217071	predicted gene 525	-	763	-1.62272	3.93323	-9.88872	1.11726e-07	1.77854e-05
chr1	60069785	60098645	-	ENSMUSG00000026019.15	protein_coding	Wdr12	57750	WD repeat domain 12	4933402C23Rik|Ytm1|Ytm1p	11955	-1.06692	6.40248	-9.86479	1.1281e-07	1.77854e-05
chr5	36017180	36398139	-	ENSMUSG00000029093.14	protein_coding	Sorcs2	81840	sortilin-related VPS10 domain containing receptor 2	N28137|mKIAA1329	8802	-3.09779	1.76675	-9.93202	1.1829e-07	1.83866e-05
chr18	3507923	3516404	+	ENSMUSG00000024232.2	protein_coding	Bambi	68010	BMP and activin membrane-bound inhibitor	2610003H06Rik	5074	-4.39332	0.535645	-9.96668	1.24722e-07	1.91171e-05
chr17	32536558	32551798	+	ENSMUSG00000048440.16	protein_coding	Cyp4f16	70101	cytochrome P450, family 4, subfamily f, polypeptide 16	2310021J05Rik|AI746515	3069	-2.19477	2.54829	-9.76428	1.34075e-07	2.00563e-05
chr8	36094828	36147787	+	ENSMUSG00000050271.12	protein_coding	Prag1	244418	PEAK1 related kinase activating pseudokinase 1	9830148H23|D8Ertd82e|NACK|Sgk223|mFLJ00269	9606	-3.44745	0.859764	-9.84528	1.34484e-07	2.00563e-05
chr15	61985391	61990374	+	ENSMUSG00000022346.15	protein_coding	Myc	17869	myelocytomatosis oncogene	AU016757|Myc2|Niard|Nird|bHLHe39	2717	-3.05982	3.13164	-10.3116	1.4567e-07	2.14348e-05
chr6	8259288	8459470	+	ENSMUSG00000089862.8	protein_coding	Umad1	100036521	UMAP1-MVP12 associated (UMA) domain containing 1	Gm16039	5018	1.29038	4.34931	9.6253	1.50253e-07	2.18183e-05
chr7	5051538	5053723	+	ENSMUSG00000055633.6	protein_coding	Zfp580	68992	zinc finger protein 580	1500015O20Rik|AI838225|Znf580	1258	-2.29362	2.4259	-9.63507	1.57392e-07	2.25582e-05
chr7	89632392	89854359	+	ENSMUSG00000030621.17	protein_coding	Me3	109264	malic enzyme 3, NADP(+)-dependent, mitochondrial	1700020C08Rik|B230207H15Rik	14624	-5.31057	-2.93933	-9.61188	1.99782e-07	2.82666e-05
chr4	111875375	111902918	-	ENSMUSG00000028544.14	protein_coding	Slc5a9	230612	solute carrier family 5 (sodium/glucose cotransporter), member 9	AI159731|SGLT4	5184	-2.53923	2.4485	-9.42084	2.0751e-07	2.89883e-05
chr1	75474569	75479307	-	ENSMUSG00000032997.16	protein_coding	Chpf	74241	chondroitin polymerizing factor	1700028N03Rik|AI414328|D1Bwg1363e	3856	-2.38399	2.59565	-9.37726	2.16094e-07	2.98102e-05
chr9	58156268	58204306	-	ENSMUSG00000037206.15	protein_coding	Islr	26968	immunoglobulin superfamily containing leucine-rich repeat	AW553146|Meflin	2686	-5.90804	-2.6334	-9.53549	2.25491e-07	3.07225e-05
chr5	105270702	105293698	-	ENSMUSG00000104713.4	protein_coding	Gbp6	100702	guanylate binding protein 6	AI595338|Mpa2l	5954	-2.66932	3.02961	-9.47922	2.43749e-07	3.28051e-05
chr5	100845713	100899102	+	ENSMUSG00000029314.14	protein_coding	Gpat3	231510	glycerol-3-phosphate acyltransferase 3	1-AGPAT|1-AGPAT 9|4933407I02Rik|4933408F15|A230097K15Rik|AGPAT 10|Agpat9|GPAT-3|mGPAT3	3502	-4.55506	0.251846	-9.3798	2.53127e-07	3.36568e-05
chr9	110857967	110864629	+	ENSMUSG00000048752.7	protein_coding	Prss50	235631	protease, serine 50	79H19C|Tsp50	1456	-5.31351	-2.91959	-9.36639	2.68698e-07	3.53018e-05
chr7	68273839	68363092	+	ENSMUSG00000074071.11	protein_coding	Fam169b	434197	family with sequence similarity 169, member B	EG434197	7027	0.849524	7.4681	9.09155	2.85153e-07	3.70229e-05
chr11	100368958	100397763	-	ENSMUSG00000001552.14	protein_coding	Jup	16480	junction plakoglobin	Ctnng|D930025P04Rik|PG	6436	-1.70499	7.20215	-11.462	3.1187e-07	4.00209e-05
chr16	20331303	20426394	-	ENSMUSG00000022822.16	protein_coding	Abcc5	27416	ATP-binding cassette, sub-family C (CFTR/MRP), member 5	2900011L11Rik|AI132311|Abcc5a|Abcc5b|Mrp5	10681	-0.919944	8.41608	-8.98524	3.25665e-07	4.13108e-05
chr11	115347707	115367756	-	ENSMUSG00000034586.14	protein_coding	Hid1	217310	HID1 domain containing	C630004H02Rik	4595	0.82306	7.92819	8.92329	3.51783e-07	4.41168e-05
chr6	121245906	121270917	+	ENSMUSG00000030107.10	protein_coding	Usp18	24110	ubiquitin specific peptidase 18	1110058H21Rik|AW047653|UBP43|Ubp15	2790	1.86252	3.08637	8.83046	4.10166e-07	5.08606e-05
chr4	150281646	150621966	+	ENSMUSG00000039852.17	protein_coding	Rere	68703	arginine glutamic acid dipeptide (RE) repeats	1110033A15Rik|AI414665|ARG|ARP|ATN1L|AW742570|Atr2|DNB1|eye<m03Jus>|eyes3|mKIAA0458	8528	-0.941221	6.91906	-8.74566	4.40887e-07	5.40626e-05
chr12	12262139	12380965	+	ENSMUSG00000020589.17	protein_coding	Fam49a	76820	family with sequence similarity 49, member A	2410157M17Rik|9630047E15|D12Ertd553e	12596	-1.3137	4.06805	-8.68982	4.7718e-07	5.78699e-05
chr1	60716800	60773359	+	ENSMUSG00000026012.2	protein_coding	Cd28	12487	CD28 antigen	-	6122	-0.83998	8.45027	-8.65267	4.96332e-07	5.95383e-05
chr14	75131101	75230842	+	ENSMUSG00000021998.16	protein_coding	Lcp1	18826	lymphocyte cytosolic protein 1	AW536232|D14Ertd310e|LCP-1|Pls2|pp65	9504	-0.825196	7.58292	-8.64	5.04458e-07	5.98624e-05
chr2	148436640	148443563	-	ENSMUSG00000027435.8	protein_coding	Cd93	17064	CD93 antigen	6030404G09Rik|AA145088|AA4.1|AW555904|C1qr1|C1qrp|Ly68	6677	1.80926	3.0623	8.63298	5.26335e-07	6.1794e-05
chr13	4191150	4205596	+	ENSMUSG00000021213.12	protein_coding	Akr1c13	27384	aldo-keto reductase family 1, member C13	mKIAA4014	1434	-2.88602	1.31845	-8.65743	5.54626e-07	6.443e-05
chr8	110919922	110972480	+	ENSMUSG00000031749.12	protein_coding	St3gal2	20444	ST3 beta-galactoside alpha-2,3-sialyltransferase 2	AI429591|AW822065|ST3GalII|Siat5	5041	-1.7728	3.28033	-8.5704	5.69422e-07	6.54599e-05
chr7	24978167	25005958	-	ENSMUSG00000040907.15	protein_coding	Atp1a3	232975	ATPase, Na+/K+ transporting, alpha 3 polypeptide	Atpa-2	5958	-2.25854	2.94456	-8.59119	6.14308e-07	6.98918e-05
chr17	5492557	5753811	+	ENSMUSG00000034265.8	protein_coding	Zdhhc14	224454	zinc finger, DHHC domain containing 14	B530001K09Rik|New1cp	3078	-0.972519	5.41718	-8.46956	6.29938e-07	7.09387e-05
chr10	37133375	37138920	-	ENSMUSG00000069662.5	protein_coding	Marcks	17118	myristoylated alanine rich protein kinase C substrate	Macs|PKCSL	4048	-0.9268	8.30171	-8.40693	6.84986e-07	7.59416e-05
chr15	27730651	28025848	-	ENSMUSG00000022263.10	protein_coding	Trio	223435	triple functional domain (PTPRF interacting)	6720464I07Rik|AA408740|Solo	23395	-1.36836	3.65216	-8.40942	6.88126e-07	7.59416e-05
chr8	72646711	72717876	+	ENSMUSG00000048148.18	protein_coding	Nwd1	319555	NACHT and WD repeat domain containing 1	A230063L24Rik	12067	-0.799991	7.98749	-8.34367	7.42314e-07	8.11106e-05
chr4	72117142	72200919	-	ENSMUSG00000008305.18	protein_coding	Tle1	21885	transducin-like enhancer of split 1	C230057C06Rik|Estm14|Grg-1|Grg1|Tle4l	8711	-2.98132	2.68086	-8.90137	7.57762e-07	8.19868e-05
chr13	91880400	92131656	-	ENSMUSG00000021708.17	protein_coding	Rasgrf2	19418	RAS protein-specific guanine nucleotide-releasing factor 2	6330417G04Rik|AW048350|Grf2|Ras-GRF2	9237	-3.38362	0.941303	-8.43768	7.68935e-07	8.23881e-05
chr9	119483408	119579016	-	ENSMUSG00000032511.17	protein_coding	Scn5a	20271	sodium channel, voltage-gated, type V, alpha	Nav1.5|Nav1.5c|SkM1|SkM2|mH1	8764	-1.36624	3.69963	-8.31498	7.79383e-07	8.27046e-05
chr13	113093825	113100981	-	ENSMUSG00000023132.8	protein_coding	Gzma	14938	granzyme A	AW494114|Ctla-3|Ctla3|Hf|Hf1|SE1|TSP-1|TSP1	1006	1.21428	5.64543	8.41094	7.89493e-07	8.29795e-05
chr5	32611171	32687057	+	ENSMUSG00000014932.15	protein_coding	Yes1	22612	YES proto-oncogene 1, Src family tyrosine kinase	Yes|p61-Yes	7508	-4.71705	-3.22446	-8.475	8.02811e-07	8.35832e-05
chr8	36216064	36249516	-	ENSMUSG00000039633.6	protein_coding	Lonrf1	244421	LON peptidase N-terminal domain and ring finger 1	-	3930	-1.27995	4.48217	-8.24467	8.53074e-07	8.75073e-05
chr11	97415533	97502402	+	ENSMUSG00000049807.16	protein_coding	Arhgap23	58996	Rho GTPase activating protein 23	A330041B18Rik	6637	1.25777	4.06226	8.24125	8.5636e-07	8.75073e-05
chr12	78961795	79007627	-	ENSMUSG00000046157.13	protein_coding	Tmem229b	268567	transmembrane protein 229B	6330442E10Rik|9830138K24|AU019070	4732	-0.84571	7.26936	-8.20594	8.91489e-07	9.02612e-05
chrX	73192207	73202930	+	ENSMUSG00000073125.10	protein_coding	Xlr3b	574437	X-linked lymphocyte-regulated 3B	EG574437|Xlr3	3780	-5.76514	-2.68547	-8.42926	9.03867e-07	9.06825e-05
chr19	3913491	3929808	-	ENSMUSG00000024885.9	protein_coding	Aldh3b1	67689	aldehyde dehydrogenase 3 family, member B1	1700001N19Rik|ALDH4|ALDH7	2046	-2.78117	1.18069	-8.21582	9.83411e-07	9.77741e-05
chr6	52206288	52208722	-	ENSMUSG00000043219.9	protein_coding	Hoxa6	15403	homeobox A6	Hox-1.2	874	-5.3786	-2.38184	-8.29185	1.06167e-06	0.000104138
chr7	30417712	30419854	-	ENSMUSG00000064109.8	protein_coding	Hcst	23900	hematopoietic cell signal transducer	DAP10|KAP10	722	-2.28495	2.25742	-8.12507	1.0663e-06	0.000104138
chr15	73205102	73423280	-	ENSMUSG00000022607.17	protein_coding	Ptk2	14083	PTK2 protein tyrosine kinase 2	FADK 1|FAK|FRNK|Fadk|p125FAK	11803	-3.86443	1.10524	-8.26359	1.09175e-06	0.000105689
chr18	57354741	57392956	+	ENSMUSG00000024594.9	protein_coding	Prrc1	73137	proline-rich coiled-coil 1	1190002C06Rik|2310058D16Rik|3110038B19Rik|9430085A19Rik	11993	-1.3563	3.7432	-8.03114	1.13996e-06	0.000109397
chr2	86020633	86045171	+	ENSMUSG00000045392.8	protein_coding	Olfr1033	258571	olfactory receptor 1033	MOR199-2	4261	-4.96744	-2.56859	-8.21213	1.1553e-06	0.000109913
chr11	115381916	115396132	+	ENSMUSG00000050910.5	protein_coding	Cdr2l	237988	cerebellar degeneration-related protein 2-like	D030068L24Rik|Gm21	3700	-1.84443	3.17053	-8.02053	1.19063e-06	0.000111481
chr1	173673675	173698395	+	ENSMUSG00000066677.12	protein_coding	Ifi208	100033459	interferon activated gene 208	9830148g24rik|E430029J22Rik|NG2creBAC|Pydc3|Pyr-rv1|Tg(Cspg4-cre)1Akik	5258	-2.6513	1.60513	-8.06531	1.19199e-06	0.000111481
chr2	174643534	174710832	+	ENSMUSG00000050600.5	protein_coding	Zfp831	100043757	zinc finger protein 831	-	9807	-2.13628	1.9105	-8.00831	1.23461e-06	0.000114497
chr4	5644090	6108223	+	ENSMUSG00000049119.14	protein_coding	Fam110b	242297	family with sequence similarity 110, member B	1700012H17Rik|5031405P22|AW049855	8164	-4.18994	-0.282331	-8.11542	1.25454e-06	0.000115376
chr13	45549755	45965008	-	ENSMUSG00000046876.16	protein_coding	Atxn1	20238	ataxin 1	2900016G23Rik|Atx1|C85907|Gm10786|Sca1	13914	-1.17495	4.48592	-7.90001	1.35541e-06	0.000123623
chr4	145267137	145315164	-	ENSMUSG00000028602.12	protein_coding	Tnfrsf8	21941	tumor necrosis factor receptor superfamily, member 8	Cd30|D1S166E|Ki|Ki-1	3459	1.42638	4.53829	7.98225	1.39875e-06	0.00012653
chr6	119432531	119544347	-	ENSMUSG00000030170.14	protein_coding	Wnt5b	22419	wingless-type MMTV integration site family, member 5B	AW545702|Wnt-5b	2654	-2.52942	1.59899	-7.9218	1.43562e-06	0.000128809
chr17	25242659	25256364	-	ENSMUSG00000047507.12	protein_coding	Baiap3	545192	BAI1-associated protein 3	Bap3|Gm937	5112	-1.19449	4.83185	-7.84958	1.45351e-06	0.000129363
chr6	113458484	113470758	+	ENSMUSG00000043088.16	protein_coding	Il17re	57890	interleukin 17 receptor E	AA589509|IL-17RE|Il25r	5868	1.40824	5.70603	8.63396	1.5308e-06	0.000135152
chr11	115475667	115490467	+	ENSMUSG00000057219.11	protein_coding	Armc7	276905	armadillo repeat containing 7	A630084C13|BC023126	3069	0.891862	7.15827	7.77969	1.59594e-06	0.000139784
chr2	102449366	102452499	-	ENSMUSG00000075012.4	protein_coding	Fjx1	14221	four jointed box 1	-	3134	2.86573	1.22439	7.80027	1.74761e-06	0.000151864
chr8	71676296	71690575	+	ENSMUSG00000031805.17	protein_coding	Jak3	16453	Janus kinase 3	fae|wil	5352	-1.1704	4.33012	-7.6095	2.02941e-06	0.000174973
chr11	119143045	119228499	-	ENSMUSG00000039976.4	protein_coding	Tbc1d16	207592	TBC1 domain family, member 16	B930087K01|BC026530|Tcd1d16	7119	-1.87235	2.38426	-7.60852	2.10731e-06	0.000180281
chr6	41605482	41620509	+	ENSMUSG00000029869.7	protein_coding	Ephb6	13848	Eph receptor B6	Cekl|Mep	3773	0.817536	9.03684	7.54973	2.19679e-06	0.000186491
chr4	139737062	139833528	-	ENSMUSG00000028736.13	protein_coding	Pax7	18509	paired box 7	Pax-7	5860	-6.55615	-1.00476	-8.19691	2.38104e-06	0.000200394
chr16	35770375	35828477	+	ENSMUSG00000022849.5	protein_coding	Hspbap1	66667	Hspb associated protein 1	3830421G21Rik	9423	-1.07303	4.47443	-7.49029	2.39688e-06	0.000200394
chr4	134741554	134768024	-	ENSMUSG00000037295.7	protein_coding	Ldlrap1	100017	low density lipoprotein receptor adaptor protein 1	AA691260|ARH2|Arh|Arh1|FHCB1|FHCB2	7010	-1.19743	4.70109	-7.47783	2.45165e-06	0.000203432
chr4	34024874	34050191	-	ENSMUSG00000028264.16	protein_coding	Spaca1	67652	sperm acrosome associated 1	1700124L11Rik|4930540L03Rik	1596	-4.95084	-2.3439	-7.58306	2.7538e-06	0.000226798
chr5	136693146	136701094	+	ENSMUSG00000005474.9	protein_coding	Myl10	59310	myosin, light chain 10, regulatory	1700027I08Rik|Mylc2pl|PLRLC	1203	1.44475	3.40059	7.38755	2.81132e-06	0.00022982
chr12	91633009	91788387	-	ENSMUSG00000020961.15	protein_coding	Ston2	108800	stonin 2	4933401N24Rik|AI425999|AW544599	12448	-1.6378	3.64895	-7.42641	2.91151e-06	0.000236261
chr14	7817957	7951588	+	ENSMUSG00000025278.9	protein_coding	Flnb	286940	filamin, beta	AL024016|Fln-b	9198	-2.38466	4.57803	-9.46003	3.11506e-06	0.000248223
chr5	105115767	105139586	-	ENSMUSG00000079363.7	protein_coding	Gbp4	17472	guanylate binding protein 4	AW228052|Mag-2|Mpa-2|Mpa2	7494	-0.894872	7.18389	-7.33475	3.12037e-06	0.000248223
chr11	117966079	117970047	-	ENSMUSG00000053113.3	protein_coding	Socs3	12702	suppressor of cytokine signaling 3	Cis3|Cish3|EF-10|Ef10|SSI-3|Ssi3	2891	1.22949	6.36463	8.08797	3.13077e-06	0.000248223
chr17	35681567	35704621	-	ENSMUSG00000003534.17	protein_coding	Ddr1	12305	discoidin domain receptor family, member 1	6030432F18|AI323681|CD167a|Cak|Nep|PTK3A	4774	-1.61802	2.89664	-7.31551	3.14889e-06	0.000248223
chrX	16619698	16687818	+	ENSMUSG00000025037.6	protein_coding	Maoa	17161	monoamine oxidase A	1110061B18Rik|AA407771	4167	-1.90608	1.79593	-7.28942	3.33576e-06	0.000261088
chr4	93334138	93335511	-	ENSMUSG00000054000.5	protein_coding	Tusc1	69136	tumor suppressor candidate 1	2200001D17Rik|TSG-9	1374	-2.34949	1.01124	-7.28904	3.46085e-06	0.000268972
chr17	8525372	8986648	+	ENSMUSG00000023868.17	protein_coding	Pde10a	23984	phosphodiesterase 10A	-	12849	1.25439	3.50631	7.21658	3.57175e-06	0.000275649
chr4	148591503	148594993	+	ENSMUSG00000006442.10	protein_coding	Srm	20810	spermidine synthase	AA407669|SpdST|SpdSy	1599	-1.43502	2.93752	-7.20326	3.66961e-06	0.000281235
chr4	143412426	143421091	+	ENSMUSG00000046862.14	protein_coding	Pramef8	242736	PRAME family member 8	4732496O08Rik|AU023234	4176	-0.947294	5.25144	-7.16009	3.85184e-06	0.000293165
chr5	129584169	129611099	+	ENSMUSG00000029436.9	protein_coding	Mmp17	23948	matrix metallopeptidase 17	MT4-MMP|MT4MMP|MTMMP4	6619	-2.39334	1.75013	-7.20272	3.9407e-06	0.000297874
chr9	49502136	49798925	-	ENSMUSG00000039542.16	protein_coding	Ncam1	17967	neural cell adhesion molecule 1	CD56|E-NCAM|NCAM-1|Ncam	8664	-4.91758	-1.41358	-7.31791	4.0321e-06	0.000302709
chr7	73740302	73776919	+	ENSMUSG00000078670.3	protein_coding	Fam174b	100038347	family with sequence similarity 174, member B	-	3262	-4.76254	-0.0882213	-7.32535	4.46305e-06	0.000332799
chr5	125017153	125179219	-	ENSMUSG00000029478.16	protein_coding	Ncor2	20602	nuclear receptor co-repressor 2	N-CoR|SMRT|SMRTe	10490	-0.815643	7.24974	-7.04939	4.52787e-06	0.000333476
chr11	99144196	99155077	-	ENSMUSG00000037944.8	protein_coding	Ccr7	12775	chemokine (C-C motif) receptor 7	CC-CKR-7|CCR-7|CD197|Cdw197|Cmkbr7|EBI1|Ebi1h	1978	-2.20039	2.10364	-7.09764	4.53256e-06	0.000333476
chr15	89142486	89149628	-	ENSMUSG00000053137.7	protein_coding	Mapk11	19094	mitogen-activated protein kinase 11	P38b|Prkm11|Sapk2|Sapk2b|p38-2|p38beta|p38beta2	2887	-1.59656	2.51275	-7.04907	4.64503e-06	0.000336152
chr1	16228674	16520112	-	ENSMUSG00000025920.19	protein_coding	Stau2	29819	staufen double-stranded RNA binding protein 2	-	6747	-4.06802	-1.05203	-7.18114	4.65927e-06	0.000336152
chr9	45117782	45130070	+	ENSMUSG00000070304.12	protein_coding	Scn2b	72821	sodium channel, voltage-gated, type II, beta	2810451E09Rik|AI840361|Gm183	4656	0.970389	5.59383	7.03199	4.66031e-06	0.000336152
chr6	89316314	89362620	-	ENSMUSG00000030084.11	protein_coding	Plxna1	18844	plexin A1	2600013D04Rik|NOV|PlexA1|Plxn1|mKIAA4053	9054	-1.944	2.90025	-7.09047	5.02579e-06	0.00036016
chr9	71504347	71592360	-	ENSMUSG00000041361.13	protein_coding	Myzap	102371	myocardial zonula adherens protein	AA407270|AV006038|Gcom1|Gm20502|Gm640|Grinl1a7|Myozap	5635	0.91713	5.22358	6.93999	5.33056e-06	0.000379536
chr2	180456245	180474867	+	ENSMUSG00000038963.15	protein_coding	Slco4a1	108115	solute carrier organic anion transporter family, member 4a1	OATP-E|Slc21a12	4799	-1.56754	2.80338	-6.89529	5.83203e-06	0.000411404
chr9	104288251	104337748	-	ENSMUSG00000032561.15	protein_coding	Acpp	56318	acid phosphatase, prostate	5'-NT|A030005E02Rik|FRAP|Lap|PAP|Ppal	7330	-6.93882	-0.535016	-7.98322	5.85271e-06	0.000411404
chr16	27388869	27452218	+	ENSMUSG00000038127.14	protein_coding	Ccdc50	67501	coiled-coil domain containing 50	C3orf6	8639	-1.18672	4.94544	-6.93835	5.99653e-06	0.000418846
chr19	58235604	58455909	-	ENSMUSG00000025089.15	protein_coding	Gfra1	14585	glial cell line derived neurotrophic factor family receptor alpha 1	AU042498	5476	2.61414	5.06155	10.2739	6.12883e-06	0.000425395
chr5	147957320	148316065	+	ENSMUSG00000029651.16	protein_coding	Mtus2	77521	microtubule associated tumor suppressor candidate 2	5730592G18Rik|A730013O20Rik|AU067634|C130038G02Rik|Cazip|Gm763|mKIAA0774	12874	-4.42496	-2.85567	-6.999	6.25495e-06	0.00042946
chr14	102976581	102982637	-	ENSMUSG00000098557.1	protein_coding	Kctd12	239217	potassium channel tetramerisation domain containing 12	AU046135|AW538430|Pfet1|Pfetin	6057	-2.43237	0.553819	-6.89319	6.26522e-06	0.00042946
chr15	25843180	25973687	+	ENSMUSG00000022270.16	protein_coding	Retreg1	66270	reticulophagy regulator 1	1810015C04Rik|AU015349|Fam134b|Retreg1d	4142	-1.5037	3.1496	-6.8309	6.40171e-06	0.000436106
chr16	46387706	46498525	-	ENSMUSG00000022656.15	protein_coding	Nectin3	58998	nectin cell adhesion molecule 3	2610301B19Rik|3000002N23Rik|4921513D19Rik|AA407785|AU016832|AW538082|CD113|Pvrl3	12747	-4.03773	-1.16682	-6.95907	6.47027e-06	0.000438073
chr2	19657752	19660583	+	ENSMUSG00000043415.5	protein_coding	Otud1	71198	OTU domain containing 1	4933428L19Rik	2832	-1.0554	4.98895	-6.80369	6.56536e-06	0.000441801
chr2	118528757	118549687	-	ENSMUSG00000040093.15	protein_coding	Bmf	171543	BCL2 modifying factor	AW260063|AW411872	5253	-1.66244	7.21492	-9.43286	7.02183e-06	0.000468168
chr11	6658521	6677475	+	ENSMUSG00000041046.7	protein_coding	Ramp3	56089	receptor (calcitonin) activity modifying protein 3	AI850306	1380	-2.76506	0.295557	-6.83544	7.04204e-06	0.000468168
chrX	42527866	43429126	-	ENSMUSG00000016150.15	protein_coding	Tenm1	23963	teneurin transmembrane protein 1	Odz1|Odz2|TCAP-1|Ten-m1|ten-1	17747	1.56368	4.34588	7.30201	7.23887e-06	0.000475638
chr2	122484941	122528040	+	ENSMUSG00000079071.2	protein_coding	Gm14085	381417	predicted gene 14085	-	4996	-2.00072	2.50757	-6.8051	7.24059e-06	0.000475638
chr1	119470305	119504794	-	ENSMUSG00000004451.14	protein_coding	Ralb	64143	v-ral simian leukemia viral oncogene B	5730472O18Rik	4930	-1.04362	4.81329	-6.72019	7.4376e-06	0.000485688
chr12	38779380	38870484	+	ENSMUSG00000004151.17	protein_coding	Etv1	14009	ets variant 1	ER81|Etsrp81	13296	-3.81108	-1.5627	-6.83708	7.65392e-06	0.000496874
chr15	76001093	76014336	-	ENSMUSG00000046761.13	protein_coding	Fam83h	105732	family with sequence similarity 83, member H	AA409316	5212	-4.19418	-2.95916	-6.81102	8.18334e-06	0.000528137
chr14	78558750	78732776	-	ENSMUSG00000034731.11	protein_coding	Dgkh	380921	diacylglycerol kinase, eta	5930402B05Rik|D130015C16|DGK	16975	-2.57982	1.06964	-6.7159	8.31218e-06	0.000533332
chr7	31032722	31042481	-	ENSMUSG00000009687.14	protein_coding	Fxyd5	18301	FXYD domain-containing ion transport regulator 5	EF-8|Oit2|RIC	4192	-0.842871	5.68914	-6.62318	8.60326e-06	0.000545348
chr19	4099998	4113965	+	ENSMUSG00000024851.14	protein_coding	Pitpnm1	18739	phosphatidylinositol transfer protein, membrane-associated 1	DRES9|Mpt-1|Nir-2|PITPnm 1|Pitpnm|R75447|Rd9|RdgB|RdgB1	7030	-0.891874	5.57785	-6.62229	8.61851e-06	0.000545348
chr16	32430921	32475070	+	ENSMUSG00000005615.15	protein_coding	Pcyt1a	13026	phosphate cytidylyltransferase 1, choline, alpha isoform	CTalpha|Cctalpha|Ctpct|Cttalpha	7412	-0.837185	5.21332	-6.61691	8.68608e-06	0.000545348
chr16	22468461	22657221	-	ENSMUSG00000022861.17	protein_coding	Dgkg	110197	diacylglycerol kinase, gamma	2900055E17Rik|90kDa|AI854428|Dagk3|E430001K23Rik|mKIAA4131	9255	-0.860758	5.37487	-6.6162	8.69711e-06	0.000545348
chr6	4600839	4643355	+	ENSMUSG00000015189.12	protein_coding	Casd1	213819	CAS1 domain containing 1	Cas1|Cast1|SOAT	4037	-0.906416	5.56258	-6.60928	8.79374e-06	0.000546725
chr9	45253837	45269149	-	ENSMUSG00000032089.16	protein_coding	Il10ra	16154	interleukin 10 receptor, alpha	AW553859|CDw210|CDw210a|IL-10R1|IL-10RA|Il10r|mIL-10R	3498	0.869934	5.252	6.60725	8.81814e-06	0.000546725
chr5	75574916	75656722	+	ENSMUSG00000005672.12	protein_coding	Kit	16590	KIT proto-oncogene receptor tyrosine kinase	Bs|CD117|Fdc|Gsfsco1|Gsfsco5|Gsfsow3|SCO1|SCO5|SOW3|Ssm|Tr-kit|W|c-KIT	8911	2.48695	2.86954	7.44354	9.18359e-06	0.000566201
chr16	43965033	43979791	-	ENSMUSG00000036304.14	protein_coding	Zdhhc23	332175	zinc finger, DHHC domain containing 23	DHHC-23|Gm1751|Gm779|nidd	5836	-1.57864	1.95347	-6.56634	9.63413e-06	0.000590679
chr6	113471427	113483140	+	ENSMUSG00000030281.16	protein_coding	Il17rc	171095	interleukin 17 receptor C	1110025H02Rik|Gm19850|IL-17RC|IL17-RC|IL17-RL|Il17rl	2671	1.68495	3.84205	7.02904	1.005e-05	0.000612774
chr9	40293233	40531383	-	ENSMUSG00000040111.16	protein_coding	Gramd1b	235283	GRAM domain containing 1B	3222402H23|A930008A22Rik|AI593249|mKIAA1201	10075	-0.944515	4.46561	-6.51812	1.01259e-05	0.000614008
chr9	7344381	7369499	+	ENSMUSG00000049723.14	protein_coding	Mmp12	17381	matrix metallopeptidase 12	AV378681|MME|Mmel	7237	-4.36136	-2.63189	-6.63262	1.0884e-05	0.000656369
chr2	102811141	102901665	-	ENSMUSG00000005087.17	protein_coding	Cd44	12505	CD44 antigen	AU023126|AW121933|AW146109|HERMES|Ly-24|Pgp-1	6776	-1.62897	2.14621	-6.48324	1.09971e-05	0.000659587
chr2	77180340	77280592	-	ENSMUSG00000042272.17	protein_coding	Sestd1	228071	SEC14 and spectrin domains 1	1500031J16Rik|A930010O20|Solo/Trio8	9857	1.09363	4.87229	6.47655	1.13196e-05	0.000675261
chr11	98348404	98357796	+	ENSMUSG00000061718.12	protein_coding	Ppp1r1b	19049	protein phosphatase 1, regulatory inhibitor subunit 1B	AU040756|DARPP-32|Darpp32	2928	-3.49437	-1.35685	-6.54977	1.1625e-05	0.000689752
chr6	52169062	52213336	-	ENSMUSG00000079560.13	protein_coding	Hoxa3	15400	homeobox A3	Hox-1.5|Mo-10	6014	-4.84071	-2.38852	-6.61281	1.20177e-05	0.000706048
chr9	75625741	75637771	+	ENSMUSG00000032184.5	protein_coding	Lysmd2	70082	LysM, putative peptidoglycan-binding, domain containing 2	2210402C18Rik|AV033872|AW538442	1543	-4.07584	-0.462545	-6.57051	1.20312e-05	0.000706048
chr4	147492417	147513486	+	ENSMUSG00000078496.9	protein_coding	Zfp982	195531	zinc finger protein 982	Gm13152	1488	4.56871	-1.37247	6.5744	1.20916e-05	0.000706048
chr15	78597047	78622019	+	ENSMUSG00000018008.8	protein_coding	Cyth4	72318	cytohesin 4	2510004M07Rik|5830469K17Rik|AI467541|Pscd4|mFLJ00017	7552	-1.23467	3.43936	-6.356	1.31367e-05	0.000754863
chr15	79028450	79030504	+	ENSMUSG00000096210.2	protein_coding	H1f0	14958	H1 histone family, member 0	D130017D06Rik|H1(0)|H1fv	2055	-2.65032	4.75085	-9.223	1.31394e-05	0.000754863
chrX	134295225	134305969	+	ENSMUSG00000033578.7	protein_coding	Tmem35a	67564	transmembrane protein 35A	9030603L14Rik|AI841526|PMP52|Tmem35	1918	1.09166	3.8603	6.34832	1.32355e-05	0.000754863
chr4	63214004	63334991	+	ENSMUSG00000045672.15	protein_coding	Col27a1	373864	collagen, type XXVII, alpha 1	5730512J02Rik|AI449266	13022	-1.12955	4.13077	-6.34746	1.32672e-05	0.000754863
chr15	78428564	78439303	+	ENSMUSG00000033287.16	protein_coding	Kctd17	72844	potassium channel tetramerisation domain containing 17	2900008M13Rik|AA414907|AW742389|N28155	2541	-1.88577	1.62996	-6.37574	1.32696e-05	0.000754863
chr17	24175431	24205562	-	ENSMUSG00000036473.16	protein_coding	Tbc1d24	224617	TBC1 domain family, member 24	9630033P11|C530046L02Rik|mKIAA1171	8557	-2.32012	1.54413	-6.38325	1.36423e-05	0.000772085
chr11	95044474	95076801	-	ENSMUSG00000001507.16	protein_coding	Itga3	16400	integrin alpha 3	AA407068|CD49C|GAPB3	5710	-5.6923	-0.979013	-6.87129	1.49793e-05	0.000843424
chr11	115799183	115813639	-	ENSMUSG00000034471.12	protein_coding	Caskin2	140721	CASK-interacting protein 2	1600028L06Rik|mKIAA1139	5177	-2.54864	1.75657	-6.41629	1.52831e-05	0.000856161
chr14	61138457	61240695	+	ENSMUSG00000048279.19	protein_coding	Sacs	50720	sacsin	A230052M14|DNAJC29|E130115J16Rik	20414	0.911958	6.61185	6.37164	1.5451e-05	0.000861198
chr17	18573151	18616003	+	ENSMUSG00000091679.9	protein_coding	Vmn2r96	433070	vomeronasal 2, receptor 96	EG433070	6894	-4.11367	-2.22765	-6.38791	1.57017e-05	0.000870774
chr9	8021672	8042823	-	ENSMUSG00000053070.5	protein_coding	Cfap300	234912	cilia and flagella associated protein 300	9230110C19Rik	1592	-2.78754	-0.232996	-6.30865	1.60013e-05	0.000878772
chr14	34410734	34503341	-	ENSMUSG00000021796.15	protein_coding	Bmpr1a	12166	bone morphogenetic protein receptor, type 1A	1110037I22Rik|ALK-3|ALK3|AU045487|BMPR-1A|BMPR-IA|Bmpr|SKR5	6351	-4.31213	-2.88626	-6.38386	1.60172e-05	0.000878772
chr16	78301489	78359774	+	ENSMUSG00000022865.14	protein_coding	Cxadr	13052	coxsackie virus and adenovirus receptor	2610206D03Rik|AU016810|AW553441|CAR|MCAR|MCVADR	7400	-2.33961	0.464142	-6.27956	1.60848e-05	0.000878772
chr10	43950636	44148853	-	ENSMUSG00000019866.14	protein_coding	Crybg1	11630	crystallin beta-gamma domain containing 1	Aim1	7525	-1.36859	2.69513	-6.21533	1.65119e-05	0.000897664
chr7	43797577	43803826	+	ENSMUSG00000064023.4	protein_coding	Klk8	259277	kallikrein related-peptidase 8	BSP1|NP|Nrpn|Prss19	1540	-2.93711	0.151633	-6.29335	1.66177e-05	0.000898987
chr14	7293648	7315049	-	ENSMUSG00000091472.2	protein_coding	Gm3739	100042235	predicted gene 3739	-	2011	-4.03805	-2.01765	-6.33681	1.6938e-05	0.000911146
chr17	45541952	45549677	-	ENSMUSG00000096847.2	protein_coding	Tmem151b	210573	transmembrane protein 151B	Gm323	4839	1.36501	6.74031	7.82049	1.70076e-05	0.000911146
chr18	89176967	89272229	+	ENSMUSG00000034028.16	protein_coding	Cd226	225825	CD226 antigen	BC051526|DNAM-1|DNAM1|Pta1|TLiSA1	4891	-2.07619	2.12628	-6.23511	1.75918e-05	0.000937675
chr4	152178134	152271855	+	ENSMUSG00000028937.14	protein_coding	Acot7	70025	acyl-CoA thioesterase 7	2410041A17Rik|Ach1|Act|Bach|CTE-IIa|Cte-II|Lach1	2124	0.780454	5.40648	6.16051	1.77452e-05	0.000937675
chr5	105014150	105139540	-	ENSMUSG00000034438.16	protein_coding	Gbp8	76074	guanylate-binding protein 8	5830443L24Rik|mGBP8	3443	-1.34001	6.85549	-7.68239	1.77577e-05	0.000937675
chr6	127446840	127494261	+	ENSMUSG00000037997.12	protein_coding	Parp11	101187	poly (ADP-ribose) polymerase family, member 11	5330431N24Rik|AI851877|ARTD11|HIN1L|PARP-11	7026	0.707422	6.54916	6.14645	1.81439e-05	0.000953504
chr13	34074274	34078007	-	ENSMUSG00000058672.7	protein_coding	Tubb2a	22151	tubulin, beta 2A class IIA	M(beta)2|Tubb2	1610	-0.914263	6.59015	-6.25281	1.87329e-05	0.000978434
chr2	165784152	165899016	-	ENSMUSG00000039671.18	protein_coding	Zmynd8	228880	zinc finger, MYND-type containing 8	1110013E22Rik|2010005I16Rik|3632413B07Rik|AI316811|AL024039|Prkcbp1|RACK7	11031	-0.752372	6.07682	-6.12449	1.87956e-05	0.000978434
chr13	64359337	64370890	-	ENSMUSG00000021477.9	protein_coding	Ctsl	13039	cathepsin L	1190035F06Rik|CatL|Ctsl1|MEP|fs|nkt	6489	-0.695934	7.33525	-6.10128	1.95053e-05	0.00101061
chr16	18052860	18071632	+	ENSMUSG00000003531.15	protein_coding	Dgcr6	13353	DiGeorge syndrome critical region gene 6	-	2985	0.825746	6.75181	6.12086	1.99059e-05	0.00102655
chr7	27305136	27337692	-	ENSMUSG00000040488.17	protein_coding	Ltbp4	108075	latent transforming growth factor beta binding protein 4	2310046A13Rik	6463	-4.94925	-1.53141	-6.34557	2.01175e-05	0.00103264
chr3	38886940	39011985	+	ENSMUSG00000046743.6	protein_coding	Fat4	329628	FAT atypical cadherin 4	6030410K14Rik|9430004M15	17165	-4.24126	-1.2716	-6.23328	2.02985e-05	0.0010371
chr11	100408456	100414836	-	ENSMUSG00000006931.15	protein_coding	P3h4	66180	prolyl 3-hydroxylase family member 4 (non-enzymatic)	1110036O03Rik|AI413214|Leprel4|Sc65	2178	-2.04043	3.51313	-6.87293	2.11413e-05	0.00107519
chr8	128358604	128503363	+	ENSMUSG00000025810.9	protein_coding	Nrp1	18186	neuropilin 1	C530029I03|NP-1|NPN-1|Npn1|Nrp	9785	-1.03025	5.19035	-6.09848	2.14938e-05	0.0010881
chr4	32657119	32775217	+	ENSMUSG00000058006.12	protein_coding	Mdn1	100019	midasin AAA ATPase 1	4833432B22Rik|A130070M06|AA958993|D4Abb1e|Gm135	21836	-0.820316	5.43403	-6.0372	2.16366e-05	0.00109033
chr6	136506167	136610862	+	ENSMUSG00000030213.12	protein_coding	Atf7ip	54343	activating transcription factor 7 interacting protein	2610204M12Rik|AM|Mcaf1	20726	-0.710678	7.77299	-6.0324	2.17939e-05	0.00109326
chr11	98446394	98455373	+	ENSMUSG00000019312.10	protein_coding	Grb7	14786	growth factor receptor bound protein 7	mKIAA4028	3365	-1.51401	2.54973	-6.03388	2.22891e-05	0.00111304
chr15	74762056	74763620	-	ENSMUSG00000034634.7	protein_coding	Ly6d	17068	lymphocyte antigen 6 complex, locus D	Ly-61|Ly61|Thb	744	-1.04263	8.13001	-6.84444	2.26394e-05	0.00112544
chr7	143005046	143019644	+	ENSMUSG00000000244.17	protein_coding	Tspan32	27027	tetraspanin 32	AW208513|Art-1|BB235973|D7Wsu37e|Phemx|Tssc6	6234	-1.21604	5.12869	-6.38364	2.3572e-05	0.00116655
chr11	97627389	97629702	-	ENSMUSG00000043439.5	protein_coding	Epop	103551	elongin BC and polycomb repressive complex 2 associated protein	AA409164|AI413509|AW539173|E13|E130012A19Rik|esPRC2p48	2314	-2.59737	0.226622	-6.04977	2.38544e-05	0.00117526
chr7	104470014	104507849	-	ENSMUSG00000057596.13	protein_coding	Trim30d	209387	tripartite motif-containing 30D	AI451617|TRIM30-3|Trim79	3758	1.87322	1.31333	5.99582	2.43692e-05	0.00119198
chr16	18406886	18426852	-	ENSMUSG00000000326.13	protein_coding	Comt	12846	catechol-O-methyltransferase	Comt1|D16Wsu103e|D330014B15Rik	2532	-1.24467	3.26845	-5.96889	2.44098e-05	0.00119198
chr1	38863867	38898161	-	ENSMUSG00000026080.13	protein_coding	Chst10	98388	carbohydrate sulfotransferase 10	AI507003|AU041319|Hnk-1st|ST	11964	-0.724105	6.29346	-5.95111	2.48641e-05	0.00120881
chr5	141241490	142215586	+	ENSMUSG00000039683.16	protein_coding	Sdk1	330222	sidekick cell adhesion molecule 1	5330440E10|6720466O15Rik	11087	-4.3942	-1.39712	-6.13143	2.49765e-05	0.00120895
chr5	128600844	128604093	+	ENSMUSG00000081683.5	protein_coding	Fzd10	93897	frizzled class receptor 10	Fz-10	3250	-6.67869	-2.25144	-7.01138	2.55825e-05	0.00123287
chr6	134715468	134792625	-	ENSMUSG00000030203.17	protein_coding	Dusp16	70686	dual specificity phosphatase 16	3830417M17Rik|AW558566|D6Ertd213e|MKP-7|MKP7|Mkpm	7798	0.985811	5.18715	5.9383	2.70388e-05	0.00129581
chr9	72662346	72749852	+	ENSMUSG00000032216.15	protein_coding	Nedd4	17999	neural precursor cell expressed, developmentally down-regulated 4	AA959633|AL023035|AU019897|E430025J12Rik|EG639396|Gm7265|KIAA0093|Nedd4-1|Nedd4a	12601	-0.639953	7.9812	-5.89766	2.71232e-05	0.00129581
chrX	114474333	114560829	+	ENSMUSG00000025597.13	protein_coding	Klhl4	237010	kelch-like 4	B130014A11|C130018J01Rik	3584	-5.71202	-0.333794	-6.65854	2.7602e-05	0.00131006
chr9	56994923	57062807	+	ENSMUSG00000032290.7	protein_coding	Ptpn9	56294	protein tyrosine phosphatase, non-receptor type 9	MEG2	4657	0.914891	4.47082	5.88669	2.7659e-05	0.00131006
chr15	31224314	31274341	+	ENSMUSG00000039168.15	protein_coding	Dap	223453	death-associated protein	4921531N22Rik|AI789753|AU040360	1925	-0.710391	5.59816	-5.87833	2.79977e-05	0.00131845
chrX	59062145	59568071	-	ENSMUSG00000031137.17	protein_coding	Fgf13	14168	fibroblast growth factor 13	Fhf2	4019	-2.51403	4.35765	-8.14486	2.8075e-05	0.00131845
chr6	122727809	122801640	-	ENSMUSG00000003153.10	protein_coding	Slc2a3	20527	solute carrier family 2 (facilitated glucose transporter), member 3	AA408729|AL023014|AL024341|AU040424|C78366|Glut-3|Glut3	7245	-0.897263	4.4979	-5.87266	2.82952e-05	0.00132316
chr10	93160875	93267071	+	ENSMUSG00000020015.10	protein_coding	Cdk17	237459	cyclin-dependent kinase 17	6430598J10Rik|Pctk2	6102	-0.647444	8.085	-5.8649	2.86168e-05	0.00133255
chr8	79028437	79193766	+	ENSMUSG00000071064.14	protein_coding	Zfp827	622675	zinc finger protein 827	2810449M09Rik|D630040G17Rik|Znf827	8944	-1.55708	2.36307	-5.8791	2.87761e-05	0.00133434
chr14	14346275	14356011	+	ENSMUSG00000068758.8	protein_coding	Il3ra	16188	interleukin 3 receptor, alpha chain	CD123|CDw123|SUT-1	2967	-1.9902	2.11155	-5.90119	3.04198e-05	0.00140466
chr11	115974709	116008412	+	ENSMUSG00000020758.15	protein_coding	Itgb4	192897	integrin beta 4	AA407042|C230078O20|CD104	7015	-1.82444	1.59412	-5.85528	3.0558e-05	0.00140516
chr5	49959956	50059006	-	ENSMUSG00000029090.12	protein_coding	Adgra3	70693	adhesion G protein-coupled receptor A3	3830613O22Rik|AU044632|Gpr125|Tem5-like	8113	-2.51178	0.591642	-5.88449	3.10312e-05	0.00141614
chr6	58932090	59024549	-	ENSMUSG00000037709.13	protein_coding	Fam13a	58909	family with sequence similarity 13, member A	AI462012|D430015B01Rik|FAM13A1|Precm1	10505	-3.41509	-1.42192	-5.93314	3.10535e-05	0.00141614
chr12	35497974	35535038	-	ENSMUSG00000019256.17	protein_coding	Ahr	11622	aryl-hydrocarbon receptor	Ah|Ahh|Ahre|In|bHLHe76	6163	-1.73342	1.31992	-5.83673	3.12708e-05	0.00142018
chr12	16670615	16800886	-	ENSMUSG00000036523.16	protein_coding	Greb1	268527	gene regulated by estrogen in breast cancer protein	5730583K22Rik|9130004E13|AF180470|AU023194|mKIAA0575	9580	1.8664	2.53883	5.95033	3.17244e-05	0.00143488
chr1	53806876	54195168	-	ENSMUSG00000042807.15	protein_coding	Hecw2	329152	HECT, C2 and WW domain containing E3 ubiquitin protein ligase 2	A730039N16Rik|D030049F17Rik|Gm971|Nedl2|mKIAA1301	12947	-1.93941	0.851044	-5.83561	3.18851e-05	0.00143626
chr7	118131308	118243670	-	ENSMUSG00000030655.15	protein_coding	Smg1	233789	SMG1 homolog, phosphatidylinositol 3-kinase-related kinase (C. elegans)	2610207I05Rik|5430435M13Rik|C130002K18Rik|mKIAA0421	23984	-0.787071	9.61495	-5.8913	3.23274e-05	0.00145026
chr19	47854970	47864790	+	ENSMUSG00000025068.8	protein_coding	Gsto1	14873	glutathione S-transferase omega 1	AA407097|AI194287|AU018802|Gsto-1|Gstx|Spg-r|p28	2023	-1.82585	1.68854	-5.81795	3.25061e-05	0.00145238
chr10	85386814	85660292	+	ENSMUSG00000020042.15	protein_coding	Btbd11	74007	BTB (POZ) domain containing 11	6330404E16Rik	10033	-2.42332	3.81316	-7.40532	3.33457e-05	0.00147976
chr17	28331671	28350817	-	ENSMUSG00000002249.21	protein_coding	Tead3	21678	TEA domain family member 3	DTEF-1|ETFR-1|TEAD-3|TEF-5|Tcf13r2	6714	-1.44118	2.53853	-5.78245	3.34908e-05	0.00147976
chr7	104263386	104288094	-	ENSMUSG00000060441.15	protein_coding	Trim5	667823	tripartite motif-containing 5	EG667823|Gm8833	3690	-2.22581	2.28364	-6.05887	3.35212e-05	0.00147976
chr15	89499623	89560261	+	ENSMUSG00000022623.17	protein_coding	Shank3	58234	SH3 and multiple ankyrin repeat domains 3	AI841104|Spank-2|proSAP2	9236	-2.41913	0.138618	-5.82337	3.4035e-05	0.00149645
chr17	15803188	15831039	-	ENSMUSG00000048027.9	protein_coding	Rgmb	68799	repulsive guidance molecule family member B	1110059F19Rik|DRAGON	7669	-3.39704	-0.0524157	-5.87178	3.5689e-05	0.00155716
chr10	28074820	28597397	+	ENSMUSG00000019889.10	protein_coding	Ptprk	19272	protein tyrosine phosphatase, receptor type, K	AI853699|PTPk|RPTPkappa	13328	-1.51726	1.65653	-5.74697	3.56979e-05	0.00155716
chr15	59648350	59657099	+	ENSMUSG00000032501.9	protein_coding	Trib1	211770	tribbles pseudokinase 1	A530090O15Rik|TRB-1|Trb1	6248	-1.31914	3.01855	-5.72414	3.66344e-05	0.00159172
chr6	41521787	41525079	+	ENSMUSG00000057163.3	protein_coding	Prss2	22072	protease, serine 2	TRY8|TRYP|Ta|Tesp4|Try2	815	-2.68294	0.292035	-5.79134	3.68113e-05	0.00159314
chr14	54431612	54445364	+	ENSMUSG00000000957.11	protein_coding	Mmp14	17387	matrix metallopeptidase 14 (membrane-inserted)	AI325305|MMP-X1|MT-MMP-1|MT1-MMP|sabe	5960	-1.71726	2.26484	-5.70915	3.86462e-05	0.00166338
chr10	82650433	82690650	-	ENSMUSG00000020251.13	protein_coding	Glt8d2	74782	glycosyltransferase 8 domain containing 2	1110021D20Rik	5773	-1.5763	2.61014	-5.704	3.87358e-05	0.00166338
chr7	143052739	143067934	+	ENSMUSG00000037706.17	protein_coding	Cd81	12520	CD81 antigen	Tapa-1|Tapa1|Tspan28	2879	-0.82015	6.62584	-5.71899	3.94417e-05	0.00168713
chr6	140424054	140597110	+	ENSMUSG00000030231.11	protein_coding	Plekha5	109135	pleckstrin homology domain containing, family A member 5	2810431N21Rik|AI428202|AK129423|AMH-Cre|Ayu21-9|Gt(pU21)9Imeg|Pepp2|Tg(AMH-cre)1Flor	9356	-0.845786	4.60081	-5.66197	4.00559e-05	0.00170678
chr17	64600736	64755110	+	ENSMUSG00000024085.13	protein_coding	Man2a1	17158	mannosidase 2, alpha 1	Mana-2|Mana2|Map-2	7223	-0.68786	6.60868	-5.65232	4.06707e-05	0.00172631
chr11	54054928	54069014	-	ENSMUSG00000020388.12	protein_coding	Pdlim4	30794	PDZ and LIM domain 4	Ril	2560	1.67593	1.19939	5.66641	4.13197e-05	0.00174714
chr11	97989578	97996181	-	ENSMUSG00000038352.15	protein_coding	Arl5c	217151	ADP-ribosylation factor-like 5C	Arl12|BC065791	2073	-0.724059	8.66341	-5.65557	4.18921e-05	0.00176459
chr5	38137192	38159907	-	ENSMUSG00000029126.7	protein_coding	Nsg1	18196	neuron specific gene family member 1	Neep21|m234|p21	3215	-4.3586	-1.69341	-5.8071	4.26512e-05	0.00178973
chr2	129065942	129096283	+	ENSMUSG00000027394.13	protein_coding	Ttl	69737	tubulin tyrosine ligase	2410003M22Rik|2700049H19Rik|AI848570	5945	0.800049	4.98571	5.61194	4.35315e-05	0.00181975
chr9	103482947	103761837	-	ENSMUSG00000042757.16	protein_coding	Tmem108	81907	transmembrane protein 108	AI462967|B130017P16Rik|R74726	9930	-1.57629	2.78316	-5.64834	4.37948e-05	0.00182385
chr18	24579881	24603817	-	ENSMUSG00000024270.11	protein_coding	Slc39a6	106957	solute carrier family 39 (metal ion transporter), member 6	Ermelin|Zip6	4073	0.645883	6.81291	5.60205	4.42327e-05	0.00183516
chr15	78667331	78718771	-	ENSMUSG00000043460.7	protein_coding	Elfn2	207393	leucine rich repeat and fibronectin type III, extracellular 2	6330514E13|AW048948|BC094219|Lrrc62|Ppp1r29	8112	2.34745	0.854507	5.61186	4.82373e-05	0.00199381
chr4	11331933	11386783	-	ENSMUSG00000040728.15	protein_coding	Esrp1	207920	epithelial splicing regulatory protein 1	2210008M09Rik|A630065D16|BC031468|Rbm35a	6305	2.15873	0.629758	5.58639	4.9386e-05	0.00202414
chr8	14911663	15001085	+	ENSMUSG00000071176.10	protein_coding	Arhgef10	234094	Rho guanine nucleotide exchange factor (GEF) 10	6430549H08Rik|mKIAA0294	9210	-1.3913	1.90877	-5.54785	4.9423e-05	0.00202414
chr2	32972990	32982083	-	ENSMUSG00000026791.14	protein_coding	Slc2a8	56017	solute carrier family 2, (facilitated glucose transporter), member 8	D2Ertd44e|GLUT8|GlutX1	3209	-1.5604	2.19196	-5.55349	4.95213e-05	0.00202414
chr19	11443553	11467055	+	ENSMUSG00000056290.16	protein_coding	Ms4a4b	60361	membrane-spanning 4-domains, subfamily A, member 4B	AI463180|Chandra|Ly116	8780	-1.96188	1.84748	-5.58615	5.02342e-05	0.0020457
chr1	170958617	170976547	-	ENSMUSG00000026656.15	protein_coding	Fcgr2b	14130	Fc receptor, IgG, low affinity IIb	AI528646|CD32|F630109E10Rik|Fc[g]RII|FcgRII|Fcgr2|Fcgr2a|Fcr-2|Fcr-3|Ly-17|Ly-m20|LyM-1|Lym-1|fcRII	5790	2.69857	-0.806007	5.59399	5.13769e-05	0.00208454
chr7	44384102	44400187	+	ENSMUSG00000030731.13	protein_coding	Syt3	20981	synaptotagmin III	AI385753|sytIII	3118	-3.58973	-0.843802	-5.63759	5.16791e-05	0.00208912
chr10	81252935	81263365	+	ENSMUSG00000004933.17	protein_coding	Matk	17179	megakaryocyte-associated tyrosine kinase	CHK|HYL|Ntk|p56ntk	4594	-1.36363	2.51654	-5.49673	5.37983e-05	0.00216685
chr9	110879870	110900530	+	ENSMUSG00000044037.15	protein_coding	Als2cl	235633	ALS2 C-terminal like	79H19D|79H19E|BC022645|D930044G19Rik|mRn.49018	5883	-2.44023	6.68018	-9.49857	5.41347e-05	0.00217247
chrX	73793359	73824969	-	ENSMUSG00000002006.12	protein_coding	Pdzd4	245469	PDZ domain containing 4	B230341P03|D130075J17Rik|Kiaa1444-hp|LU1|PDZRN4L|Pdzk4|Pdzrnk4l|Xlu	3970	0.825148	4.80031	5.47523	5.48088e-05	0.00218764
chr17	87635979	87651129	+	ENSMUSG00000045394.9	protein_coding	Epcam	17075	epithelial cell adhesion molecule	CD326|EGP|EGP-2|Egp314|Ep-CAM|EpCAM1|GA733-2|Ly74|TROP1|Tacsd1|Tacstd1|gp40	2195	-1.42185	2.39434	-5.48681	5.49091e-05	0.00218764
chr12	112588784	112615557	+	ENSMUSG00000037679.9	protein_coding	Inf2	70435	inverted formin, FH2 and WH2 domain containing	2610204M08Rik|AA589465|AW125550|EG629699	4871	-1.62464	1.36454	-5.48182	5.61984e-05	0.00223095
chr3	8925593	9004723	-	ENSMUSG00000027506.15	protein_coding	Tpd52	21985	tumor protein D52	AI043038|mD52	7487	0.777386	4.78763	5.45494	5.67052e-05	0.00224301
chr2	101624718	101632529	+	ENSMUSG00000032864.4	protein_coding	Rag2	19374	recombination activating gene 2	Rag-2	3424	-0.68854	8.21235	-5.44773	5.7445e-05	0.00226416
chr2	152393611	152398063	-	ENSMUSG00000051817.8	protein_coding	Sox12	20667	SRY (sex determining region Y)-box 12	2010205A02Rik	4453	-2.02825	1.23961	-5.48782	5.76638e-05	0.00226469
chr10	127739538	127747349	+	ENSMUSG00000044617.8	protein_coding	Zbtb39	320080	zinc finger and BTB domain containing 39	7030401O21Rik|mKIAA0352	5960	-1.02472	3.82594	-5.41078	6.13551e-05	0.00240112
chr17	35059035	35062095	+	ENSMUSG00000007039.12	protein_coding	Ddah2	51793	dimethylarginine dimethylaminohydrolase 2	1110003M04Rik|AU019324|AW413173|DDAH-2|DDAHII|Ddah|G6a|NG30	1593	0.754527	4.81214	5.39567	6.27076e-05	0.00244537
chr17	56412426	56476483	-	ENSMUSG00000013236.17	protein_coding	Ptprs	19280	protein tyrosine phosphatase, receptor type, S	AL022616|PTP|PTP-NU3|PTPNU-3|PTPsigma|Ptpt9|R-PTP-S|RPTPsigma	14990	-0.68036	6.93417	-5.39102	6.319e-05	0.00245551
chr8	27260329	27276674	+	ENSMUSG00000031490.6	protein_coding	Eif4ebp1	13685	eukaryotic translation initiation factor 4E binding protein 1	4e-bp1|AA959816|PHAS-I	2196	-1.67623	1.41884	-5.41084	6.37044e-05	0.00246681
chr11	98001508	98023034	-	ENSMUSG00000020882.17	protein_coding	Cacnb1	12295	calcium channel, voltage-dependent, beta 1 subunit	CAB1|Cchb1|Cchlb1	4529	-0.901661	4.75375	-5.37399	6.51634e-05	0.00251449
chr4	155260129	155361361	-	ENSMUSG00000029053.16	protein_coding	Prkcz	18762	protein kinase C, zeta	AI098070|C80388|Pkcz|R74924|aPKCzeta|nPKC-zeta|zetaPKC	6318	-2.72504	1.82699	-5.90846	6.57208e-05	0.00252716
chr4	148152800	148160482	-	ENSMUSG00000029001.15	protein_coding	Fbxo44	230903	F-box protein 44	5730411K09|AV001623|FBG3|FBX30|Fbx6a|Fbxo6a	3024	-1.1928	2.75845	-5.36496	6.67414e-05	0.00255749
chr7	31130127	31155896	-	ENSMUSG00000001248.15	protein_coding	Gramd1a	52857	GRAM domain containing 1A	1300003M23Rik|AI415002|AW547240|D7Bwg0611e	5239	-0.605315	8.06696	-5.35665	6.69998e-05	0.00255851
chr15	9505788	9530176	-	ENSMUSG00000003882.5	protein_coding	Il7r	16197	interleukin 7 receptor	CD127|IL-7Ralpha	4663	-2.38903	0.0119587	-5.41141	6.81042e-05	0.00259172
chr6	15720661	15802169	+	ENSMUSG00000041390.18	protein_coding	Mdfic	16543	MyoD family inhibitor domain containing	Kdt1|Mdfid	7427	-1.57621	2.00149	-5.36497	6.83607e-05	0.00259254
chr16	10959275	11066157	-	ENSMUSG00000022500.15	protein_coding	Litaf	56722	LPS-induced TN factor	3222402J11Rik|C85531|N4WBP3|TBX1	5156	-1.81996	1.16854	-5.37506	6.85984e-05	0.00259264
chr3	63696234	63899472	-	ENSMUSG00000036834.16	protein_coding	Plch1	269437	phospholipase C, eta 1	BC042549|PLC-eta-1|PLCeta1|Plcl3	8637	-4.2654	-2.15927	-5.49659	7.25861e-05	0.00273399
chr9	70207350	70399766	+	ENSMUSG00000032220.10	protein_coding	Myo1e	71602	myosin IE	2310020N23Rik|9130023P14Rik|AA407778|myosin-1e|myr 3	5704	2.84182	-0.636366	5.39366	7.33897e-05	0.00275486
chr9	69453620	69491795	+	ENSMUSG00000032231.14	protein_coding	Anxa2	12306	annexin A2	AW215814|Cal1h	3731	0.569306	9.43698	5.29793	7.40892e-05	0.002766
chr1	173920407	173942672	-	ENSMUSG00000039997.16	protein_coding	Ifi203	15950	interferon activated gene 203	Ifi203a|Ifi203b|Mndal	6706	-0.963638	4.53893	-5.29954	7.41877e-05	0.002766
chr2	80500512	80581380	-	ENSMUSG00000027002.13	protein_coding	Nckap1	50884	NCK-associated protein 1	C79304|H19|Hem-2|Hem2|Nap1|mKIAA0587|mh19|p125Nap1	4964	-0.927493	3.56608	-5.28419	7.60386e-05	0.00282546
chr6	8255936	8259173	-	ENSMUSG00000012483.4	protein_coding	Rpa3	68240	replication protein A3	14kDa|C330026P08Rik	1136	1.3787	5.64363	6.49964	7.68186e-05	0.00284487
chr14	51905271	51914158	-	ENSMUSG00000004558.15	protein_coding	Ndrg2	29811	N-myc downstream regulated gene 2	AI182517|AU040374|Ndr2|SYLD	3397	-1.08601	3.68809	-5.2785	7.71e-05	0.00284574
chr11	119393100	119487418	+	ENSMUSG00000070327.14	protein_coding	Rnf213	672511	ring finger protein 213	6030403J01|D11Ertd759e|mysterin	16888	-0.711477	6.7921	-5.27262	7.74832e-05	0.00285035
chr8	41340197	41374773	-	ENSMUSG00000031591.14	protein_coding	Asah1	11886	N-acylsphingosine amidohydrolase 1	2310081N20Rik|AC|Asah	3390	-1.0858	3.15335	-5.26878	7.84017e-05	0.00287455
chr8	119862266	119876995	+	ENSMUSG00000031828.9	protein_coding	Klhl36	234796	kelch-like 36	-	2339	0.778534	4.88443	5.26297	7.87265e-05	0.00287691
chr7	30421732	30428746	+	ENSMUSG00000036931.15	protein_coding	Nfkbid	243910	nuclear factor of kappa light polypeptide gene enhancer in B cells inhibitor, delta	I-kappa-B-delta|IkappaBNS|ikB-delta	2346	-1.05623	4.1178	-5.26821	8.04065e-05	0.00292631
chr9	96119362	96184608	+	ENSMUSG00000041440.18	protein_coding	Gk5	235533	glycerol kinase 5 (putative)	AV095337|C330018K18Rik|G630067D24Rik	8493	0.79481	4.554	5.24933	8.06088e-05	0.00292631
chrX	75785654	75875182	-	ENSMUSG00000016382.15	protein_coding	Pls3	102866	plastin 3 (T-isoform)	AI115446|AL024105	4238	-4.16456	-2.2595	-5.41629	8.13859e-05	0.00294484
chr7	30434982	30445535	-	ENSMUSG00000006651.8	protein_coding	Aplp1	11803	amyloid beta (A4) precursor-like protein 1	-	3017	-3.11519	-1.13367	-5.33487	8.33379e-05	0.00300561
chr9	57940112	57962865	+	ENSMUSG00000038264.8	protein_coding	Sema7a	20361	sema domain, immunoglobulin domain (Ig), and GPI membrane anchor, (semaphorin) 7A	2900057C09Rik|CDw108|H-Sema K1|H-Sema-L|M-Sema-L|Semal|sema K1|sema L	3298	-0.614832	7.36067	-5.22261	8.43565e-05	0.00303244
chr13	23620629	23622558	-	ENSMUSG00000051627.3	protein_coding	Hist1h1e	50709	histone cluster 1, H1e	H1-4|H1.4|H1e|H1f4|H1s-4|H1var2	1930	2.21665	-0.0631718	5.27559	8.46779e-05	0.00303411
chr2	3455815	3475031	-	ENSMUSG00000026646.16	protein_coding	Suv39h2	64707	suppressor of variegation 3-9 2	4930507K23Rik|AA536750|D030054H19Rik|D2Ertd544e|KMT1B	4410	-1.66901	2.11444	-5.24478	8.60892e-05	0.00307469
chr5	117414000	117775003	+	ENSMUSG00000061578.8	protein_coding	Ksr2	333050	kinase suppressor of ras 2	-	13590	-3.33467	-0.215864	-5.36739	8.65514e-05	0.00308123
chr10	61297833	61304680	+	ENSMUSG00000037202.6	protein_coding	Prf1	18646	perforin 1 (pore forming protein)	Pfn|Pfp|Prf-1	2584	-1.57181	1.97199	-5.2259	8.68933e-05	0.00308345
chr7	127989708	127993867	-	ENSMUSG00000030793.4	protein_coding	Pycard	66824	PYD and CARD domain containing	9130417A21Rik|Asc|CARD5|TMS-1|TNS1|masc	3800	0.725641	7.52953	5.22234	9.03079e-05	0.00319435
chr5	102481391	102897937	+	ENSMUSG00000057315.14	protein_coding	Arhgap24	231532	Rho GTPase activating protein 24	0610025G21Rik	8792	-1.1879	2.89806	-5.16969	9.34578e-05	0.00329521
chr8	88626563	88636128	-	ENSMUSG00000031662.8	protein_coding	Snx20	71607	sorting nexin 20	9130017C17Rik	6439	-0.812206	5.17952	-5.15284	9.52766e-05	0.00334864
chr1	78657825	78707743	+	ENSMUSG00000032883.15	protein_coding	Acsl3	74205	acyl-CoA synthetase long-chain family member 3	2610510B12Rik|Acs3|C85929|Facl3|Pro2194	4357	-0.860147	4.93417	-5.15043	9.57275e-05	0.00335381
chr12	31958476	32061296	-	ENSMUSG00000002997.15	protein_coding	Prkar2b	19088	protein kinase, cAMP dependent regulatory, type II beta	AI451071|AW061005|PKARIIbeta|Pkarb2|RII(beta)	3652	0.722653	5.36869	5.13698	9.78808e-05	0.00341839
chr15	101224188	101232756	+	ENSMUSG00000000531.5	protein_coding	Grasp	56149	GRP1 (general receptor for phosphoinositides 1)-associated scaffold protein	tamalin	2033	-1.59387	1.54498	-5.14655	9.99664e-05	0.00348022
chr14	121542046	121797837	-	ENSMUSG00000025558.18	protein_coding	Dock9	105445	dedicator of cytokinesis 9	AA959601|AW538057|B230309H04Rik|D14Wsu89e|Zizimin1|mKIAA1058	13398	-0.821879	4.16684	-5.1214	0.000100642	0.00349272
chr2	13573927	13582826	+	ENSMUSG00000026728.9	protein_coding	Vim	22352	vimentin	-	4743	0.7491	6.81524	5.15177	0.000101894	0.00351919
chr1	193153111	193172023	+	ENSMUSG00000026638.15	protein_coding	Irf6	54139	interferon regulatory factor 6	AI876454|E230028I05Rik|mirf6	7069	-1.00992	3.41768	-5.11545	0.000102042	0.00351919
chr3	148815583	148990555	-	ENSMUSG00000028184.12	protein_coding	Adgrl2	99633	adhesion G protein-coupled receptor L2	AI450192|CIRL-2|Gm619|Lec1|Lphh1|Lphn2|mKIAA0786	14198	-1.78928	0.997745	-5.14092	0.000102725	0.00353168
chr2	155490379	155518237	-	ENSMUSG00000027603.15	protein_coding	Ggt7	207182	gamma-glutamyltransferase 7	1110017C11Rik|6330563L03Rik|Ggtl3	3264	-1.52459	1.9337	-5.11226	0.000105556	0.00361774
chr5	34949445	35039644	+	ENSMUSG00000029101.16	protein_coding	Rgs12	71729	regulator of G-protein signaling 12	1200016K18Rik|4632412M04Rik|AI481290|E130309H11	8487	0.721369	6.24486	5.07515	0.000109129	0.00372864
chr19	14448150	14598051	-	ENSMUSG00000024642.17	protein_coding	Tle4	21888	transducin-like enhancer of split 4	5730411M05Rik|AA792082|Bce-1|Bce1|ESTM13|ESTM14|Grg4|X83332|X83333|grg-4	5702	-0.839945	4.84404	-5.04158	0.000115729	0.00394192
chr14	17660261	18038090	+	ENSMUSG00000021779.17	protein_coding	Thrb	21834	thyroid hormone receptor beta	Nr1a2|T3R[b]|T3Rbeta|Thrb1|Thrb2|c-erbAbeta	7403	-2.24028	-0.409988	-5.08902	0.000117739	0.00399805
chr5	135023482	135051100	+	ENSMUSG00000007207.10	protein_coding	Stx1a	20907	syntaxin 1A (brain)	HPC-1	2666	-1.18168	2.28609	-5.02967	0.00011935	0.00404034
chr5	140321656	140338137	+	ENSMUSG00000036639.12	protein_coding	Nudt1	17766	nudix (nucleoside diphosphate linked moiety X)-type motif 1	Mth1	1473	0.878824	4.49419	5.00237	0.000124042	0.00417787
chr11	5969644	6066362	-	ENSMUSG00000057897.14	protein_coding	Camk2b	12323	calcium/calmodulin-dependent protein kinase II, beta	CaMKII	9125	-2.51047	0.708541	-5.11324	0.00012417	0.00417787
chr8	94974751	95014217	+	ENSMUSG00000031785.16	protein_coding	Adgrg1	14766	adhesion G protein-coupled receptor G1	Cyt28|Gpr56|TM7LN4|TM7XN1	5421	-0.674062	5.86166	-4.99451	0.000125559	0.00421177
chr12	52503972	52571975	+	ENSMUSG00000035133.9	protein_coding	Arhgap5	11855	Rho GTPase activating protein 5	p190-B|p190B	10887	1.1067	2.50559	4.98971	0.000127629	0.00426821
chr1	166384622	166409863	-	ENSMUSG00000040596.15	protein_coding	Pogk	71592	pogo transposable element with KRAB domain	9130401E23Rik|BASS2|mKIAA1513	9586	-0.886223	4.12481	-4.98079	0.000128861	0.00429639
chr2	132868305	132880891	-	ENSMUSG00000043110.2	protein_coding	Lrrn4	320974	leucine rich repeat neuronal 4	B430119L13Rik|Nlrr4	3715	-2.01726	0.15174	-5.02161	0.000129663	0.00431012
chr11	71092236	71144704	-	ENSMUSG00000069830.10	protein_coding	Nlrp1a	195046	NLR family, pyrin domain containing 1A	CARD7|DEFCAP|Gm14|Gm15|NAC|Nalp1|Nalp1a|Nlrp1|PP1044	4166	-1.9114	0.334687	-5.00906	0.000131172	0.00434719
chr2	31245823	31295989	+	ENSMUSG00000062661.6	protein_coding	Ncs1	14299	neuronal calcium sensor 1	9430075O15Rik|A730032G13Rik|AI836659|Freq|Mfreq|NCS-1	4653	-3.35687	-2.19376	-5.08241	0.000132654	0.00437973
chr11	74383356	74610915	-	ENSMUSG00000038807.19	protein_coding	Rap1gap2	380711	RAP1 GTPase activating protein 2	AU067654|Garnl4|Gm1561|mKIAA1039	7164	2.14826	0.562493	5.01512	0.000132947	0.00437973
chr9	15493432	15545260	+	ENSMUSG00000058173.12	protein_coding	Smco4	170748	single-pass membrane protein with coiled-coil domains 4	Fn5	1173	-1.92648	0.516627	-4.99467	0.000134771	0.00442657
chr1	43123074	43196984	-	ENSMUSG00000008136.14	protein_coding	Fhl2	14200	four and a half LIM domains 2	FHL-2|SLIM-3|SLIM3	1897	-2.63007	-0.669207	-5.02228	0.000137936	0.00451709
chr1	193221634	193264075	-	ENSMUSG00000016194.14	protein_coding	Hsd11b1	15483	hydroxysteroid 11-beta dehydrogenase 1	-	4251	0.728629	6.09205	4.93874	0.000138684	0.00452464
chr11	115814724	115823094	+	ENSMUSG00000020781.14	protein_coding	Tsen54	76265	tRNA splicing endonuclease subunit 54	0610034P02Rik	2458	-1.13228	2.63374	-4.94204	0.000138986	0.00452464
chr9	21288410	21291407	-	ENSMUSG00000096472.2	protein_coding	Cdkn2d	12581	cyclin dependent kinase inhibitor 2D	INK4d|p19|p19INK4d	1574	0.605383	8.05703	4.92865	0.000141001	0.00457674
chrX	153832225	153834243	+	ENSMUSG00000046550.8	protein_coding	Spin2c	278240	spindlin family, member 2C	BC068162|SPIN-2C|Spin2	1377	-4.24198	-2.22845	-5.12782	0.000143176	0.00463368
chr12	100300770	100520826	-	ENSMUSG00000033530.8	protein_coding	Ttc7b	104718	tetratricopeptide repeat domain 7B	AA408451|Ttc7l1	7320	-0.696582	5.28111	-4.89594	0.000149434	0.00481485
chr8	40423815	40510268	+	ENSMUSG00000039470.15	protein_coding	Zdhhc2	70546	zinc finger, DHHC domain containing 2	5730415P04Rik|6430583A19Rik|DHHC-2	5528	-2.5526	-0.848004	-4.97222	0.000149648	0.00481485
chr15	78479256	78495271	-	ENSMUSG00000068227.9	protein_coding	Il2rb	16185	interleukin 2 receptor, beta chain	CD122|IL-15Rbeta|IL15Rbeta|Il-2/15Rbeta|Il-2Rbeta|p70	4287	-3.0575	-0.956838	-4.99817	0.000150082	0.00481485
chr5	136083916	136111860	+	ENSMUSG00000004952.13	protein_coding	Rasa4	54153	RAS p21 protein activator 4	AA793972|AW112107|BB079060|CAPRI|GAPL	7485	0.886259	5.03524	4.90782	0.000155658	0.00497926
chr8	71689214	71690575	+	ENSMUSG00000079019.2	protein_coding	Insl3	16336	insulin-like 3	Rlf|Rlnl	623	-3.36593	-2.43672	-4.96583	0.00016347	0.00521403
chrX	145446425	145505181	-	ENSMUSG00000041688.16	protein_coding	Amot	27494	angiomotin	CAG-2|D0Kist1|Sii6	8402	-3.54858	-2.49636	-4.96637	0.000165832	0.00526173
chr11	50850685	50866208	+	ENSMUSG00000000617.14	protein_coding	Grm6	108072	glutamate receptor, metabotropic 6	BC021919|Gm3|Gprc1f|mGluR6|nerg1|nob2|nob3|nob4	5421	-3.269	-0.815745	-4.96516	0.000166207	0.00526173
chr9	66508375	66514609	-	ENSMUSG00000050503.9	protein_coding	Fbxl22	74165	F-box and leucine-rich repeat protein 22	1110004B15Rik	4035	1.08747	3.63214	4.8545	0.000166396	0.00526173
chr13	117602320	117987418	+	ENSMUSG00000021730.8	protein_coding	Hcn1	15165	hyperpolarization activated cyclic nucleotide gated potassium channel 1	Bcng1|C630013B14Rik|HAC2	18120	-3.59125	-2.07385	-4.96492	0.000167007	0.00526596
chr19	37899036	38043577	-	ENSMUSG00000048612.16	protein_coding	Myof	226101	myoferlin	2310004N10Rik|2310051D19Rik|E030042N20Rik|Fer1l3	12603	-2.23909	1.59128	-5.06382	0.000172309	0.00541768
chr2	172393794	172433757	+	ENSMUSG00000074570.14	protein_coding	Cass4	320664	Cas scaffolding protein family member 4	F730031O20Rik	5340	0.863175	4.14081	4.80896	0.000174679	0.00547001
chr9	43310848	43336115	+	ENSMUSG00000032013.6	protein_coding	Trim29	72169	tripartite motif-containing 29	1110047J21Rik|2810431N19Rik|4732461M22Rik|AI119726	3473	2.0445	0.284111	4.8555	0.000174965	0.00547001
chr14	8002902	8056763	+	ENSMUSG00000025277.14	protein_coding	Abhd6	66082	abhydrolase domain containing 6	0610041D24Rik|AA673485|AV065425	2365	-1.76918	0.932779	-4.83423	0.000176731	0.00550961
chr17	47737030	47792419	+	ENSMUSG00000023990.18	protein_coding	Tfeb	21425	transcription factor EB	Tcfeb|bHLHe35	5669	-1.17754	2.1879	-4.7868	0.000183629	0.00570853
chr16	18060357	18090203	-	ENSMUSG00000003526.12	protein_coding	Prodh	19125	proline dehydrogenase	Pro-1|Pro1|Ym24d07	7797	0.720589	6.32302	4.78456	0.000186902	0.00579398
chr10	79988584	79996062	+	ENSMUSG00000004665.10	protein_coding	Cnn2	12798	calponin 2	AA408047|AI324678|Calpo2	2460	-0.681669	6.40873	-4.76491	0.000188845	0.00583781
chr17	88597684	88662586	+	ENSMUSG00000033855.15	protein_coding	Ston1	77057	stonin 1	4921524J06Rik|C86231|Salf|Sblf	4521	-1.27564	3.19735	-4.80529	0.00018941	0.00583892
chr18	4634878	4682869	+	ENSMUSG00000033960.6	protein_coding	Jcad	240185	junctional cadherin 5 associated	1110056P05Rik|9430020K01Rik|Gm328|mKIAA1462	7311	-2.15328	-0.136681	-4.81625	0.000189968	0.00583981
chr14	55618037	55625395	+	ENSMUSG00000002324.8	protein_coding	Rec8	56739	REC8 meiotic recombination protein	Rec8L1|mrec	2935	-1.36886	1.85746	-4.76595	0.000192925	0.00591421
chr3	121952541	122016753	+	ENSMUSG00000039831.16	protein_coding	Arhgap29	214137	Rho GTPase activating protein 29	6720461J18Rik|A830014I19|AU040217|B130017I01Rik|C76601|Parg1	8815	1.85384	1.10426	4.78438	0.000195168	0.0059664
chr2	122765237	122809569	+	ENSMUSG00000005803.14	protein_coding	Sqor	59010	sulfide quinone oxidoreductase	0610039J17Rik|4930557M22Rik|Sqrdl	4084	-0.754998	4.97906	-4.74107	0.000196984	0.00600531
chr17	21816885	21845772	-	ENSMUSG00000069743.5	protein_coding	Zfp820	75424	zinc finger protein 820	2610036F08Rik	3718	-1.29955	1.6531	-4.74882	0.000198002	0.00601971
chr18	80966376	80986771	-	ENSMUSG00000024565.9	protein_coding	Sall3	20689	spalt like transcription factor 3	B130022O04Rik|Msal|Msal-1|Sal|Salt|Spalt	7481	3.01287	-0.606007	4.8507	0.000200364	0.00605276
chr9	66775202	66795490	-	ENSMUSG00000032375.15	protein_coding	Aph1b	208117	aph1 homolog B, gamma secretase subunit	2310057K14Rik|Aph1c	5163	1.12141	2.32991	4.73559	0.000200749	0.00605276
chr5	7960457	7982213	+	ENSMUSG00000012428.9	protein_coding	Steap4	117167	STEAP family member 4	1110021O17Rik|AI481214|Tiarp|Tnfaip9	3155	-3.68363	-1.75654	-4.88127	0.000200996	0.00605276
chr11	113726850	113751881	-	ENSMUSG00000041598.7	protein_coding	Cdc42ep4	56699	CDC42 effector protein (Rho GTPase binding) 4	1500041M20Rik|Borg4|CEP4	3643	0.865836	4.85839	4.74375	0.000201283	0.00605276
chr6	90486427	90600203	+	ENSMUSG00000030088.15	protein_coding	Aldh1l1	107747	aldehyde dehydrogenase 1 family, member L1	1810048F20Rik|FDH|Fthfd|Neut2	4516	-1.16418	2.87375	-4.72821	0.000203853	0.00611337
chr6	48833818	48841496	-	ENSMUSG00000029810.15	protein_coding	Tmem176b	65963	transmembrane protein 176B	1810009M01Rik|Clast1|Lr8	2371	-0.860055	3.89723	-4.72086	0.000204503	0.00611624
chr11	105933702	105953336	-	ENSMUSG00000019590.16	protein_coding	Cyb561	13056	cytochrome b-561	-	3653	-3.85544	-2.60303	-4.8599	0.00021165	0.0063129
chr4	120666572	120667820	+	ENSMUSG00000070803.6	protein_coding	Cited4	56222	Cbp/p300-interacting transactivator, with Glu/Asp-rich carboxy-terminal domain, 4	MRG-2|Mrg2	1249	-2.34458	0.142589	-4.75919	0.000215006	0.0063957
chr7	105558483	105581653	-	ENSMUSG00000037032.16	protein_coding	Apbb1	11785	amyloid beta (A4) precursor protein-binding, family B, member 1	Fe65|Rir	4408	-2.22284	-0.167376	-4.74788	0.000216625	0.00642654
chr6	112717971	112947266	-	ENSMUSG00000030257.16	protein_coding	Srgap3	259302	SLIT-ROBO Rho GTPase activating protein 3	AI452337|Arhgap14|D130026O08Rik|Gbi|MEGAP|WRP|mKIAA0411	9852	1.28368	2.39182	4.6699	0.000228057	0.00674755
chr4	43482081	43483734	-	ENSMUSG00000028460.6	protein_coding	Sit1	54390	suppression inducing transmembrane adaptor 1	Sit	1262	0.614292	7.80351	4.65139	0.000231312	0.00682557
chr18	35118859	35254779	+	ENSMUSG00000037815.7	protein_coding	Ctnna1	12385	catenin (cadherin associated protein), alpha 1	2010010M04Rik|AA517462|AI988031|Catna1	6425	0.823606	5.81811	4.74499	0.000234652	0.00690566
chr1	165137855	165160773	-	ENSMUSG00000026572.11	protein_coding	Tbx19	83993	T-box 19	AU019250|D1Ertd754e|Tpit	3192	-1.207	2.20852	-4.62514	0.000246132	0.00722424
chr17	86167785	86657919	+	ENSMUSG00000045038.14	protein_coding	Prkce	18754	protein kinase C, epsilon	5830406C15Rik|PKC[e]|PKCepsilon|Pkce|R75156	7261	-1.54382	1.0438	-4.63484	0.0002481	0.00726269
chr2	118663303	118698020	+	ENSMUSG00000074923.10	protein_coding	Pak6	214230	p21 (RAC1) activated kinase 6	4732456M09	5211	0.776106	4.18604	4.60749	0.00025059	0.00731618
chr7	6363280	6382605	+	ENSMUSG00000055150.15	protein_coding	Zfp78	330463	zinc finger protein 78	A330079D15|KRAB12|Zfp77	5018	-2.13649	-0.697808	-4.65909	0.00025232	0.00734723
chr1	179960472	180165603	+	ENSMUSG00000026490.18	protein_coding	Cdc42bpa	226751	CDC42 binding protein kinase alpha	A930014J19Rik|DMPK-like	21522	3.0155	2.67413	6.06909	0.000254117	0.0073801
chr1	182467260	182517608	-	ENSMUSG00000026509.15	protein_coding	Capn2	12334	calpain 2	AI326419|CALP80|Capa-2|Capa2|m-calpain|m-calpin	6345	-0.856412	4.49352	-4.59436	0.00025709	0.00744684
chr9	108689314	108750436	+	ENSMUSG00000032601.13	protein_coding	Prkar2a	19087	protein kinase, cAMP dependent regulatory, type II alpha	1110061A24Rik|AI317181|AI836829|RII(alpha)	6378	-1.67314	0.817186	-4.60779	0.00026387	0.00762321
chr7	112225856	112413106	+	ENSMUSG00000038244.14	protein_coding	Mical2	320878	microtubule associated monooxygenase, calponin and LIM domain containing 2	5330438E18Rik|9530064J02|MICAL-2|mKIAA0750	15218	-1.50655	1.57737	-4.59506	0.000265858	0.00766061
chr4	145213463	145246870	-	ENSMUSG00000028599.10	protein_coding	Tnfrsf1b	21938	tumor necrosis factor receptor superfamily, member 1b	CD120b|TNF-R-II|TNF-R2|TNF-R75|TNF-alphaR2|TNFBR|TNFR80|TNFRII|TNFalpha-R2|Tnfr-1|Tnfr2|p75	3818	-0.815668	4.07538	-4.57228	0.00026721	0.0076795
chr9	81863670	82206007	+	ENSMUSG00000043289.12	protein_coding	Mei4	75033	meiotic double-stranded break formation protein 4	4930486G11Rik	4121	-1.1492	2.20825	-4.57356	0.000269429	0.00772318
chr16	4639941	4650802	+	ENSMUSG00000039646.5	protein_coding	Vasn	246154	vasorin	2610528G05Rik|Atia|Slitl2	3007	-1.01283	4.68658	-4.72326	0.000272963	0.0078042
chr18	60911780	60918561	+	ENSMUSG00000036412.5	protein_coding	Arsi	545260	arylsulfatase i	BC020108	2975	1.15784	6.70874	5.68144	0.000274677	0.00783291
chr7	45302632	45333780	-	ENSMUSG00000038260.10	protein_coding	Trpm4	68667	transient receptor potential cation channel, subfamily M, member 4	1110030C19Rik|AW047689|LTRPC4|LTrpC-4|TRPM4B	10826	-1.48464	1.23505	-4.57319	0.000276153	0.00785469
chr1	193175453	193201703	-	ENSMUSG00000037318.10	protein_coding	Traf3ip3	215243	TRAF3 interacting protein 3	6030423D04Rik|AI115021|T3jam	5756	0.660845	7.9539	4.57737	0.000278602	0.00788829
chr11	100415697	100424824	+	ENSMUSG00000001555.10	protein_coding	Fkbp10	14230	FK506 binding protein 10	AI325255|FKBP-10|FKBP-65|FKBP65|Fkbp-rs1|Fkbp1-rs|Fkbp6|Fkbprp	2935	-2.0013	-0.0187092	-4.59664	0.000278764	0.00788829
chr12	3365132	3406494	+	ENSMUSG00000020668.10	protein_coding	Kif3c	16570	kinesin family member 3C	mKIAA4058	7406	0.617404	5.99926	4.53962	0.000283178	0.00798622
chr4	134537892	134552166	-	ENSMUSG00000050989.9	protein_coding	Selenon	74777	selenoprotein N	1110019I12Rik|AI414492|SelN|Sepn1	3619	-1.65891	1.10706	-4.56746	0.000283671	0.00798622
chr5	134099711	134144343	+	ENSMUSG00000015944.9	protein_coding	Castor2	80909	cytosolic arginine sensor for mTORC1 subunit 2	7530428J21Rik|AW742413|Gats|Gatsl1|Gatsl2	7560	-0.664927	4.96698	-4.53221	0.000287048	0.00804255
chr3	88435959	88461182	-	ENSMUSG00000028064.17	protein_coding	Sema4a	20351	sema domain, immunoglobulin domain (Ig), transmembrane domain (TM) and short cytoplasmic domain, (semaphorin) 4A	AI132332|SemB|Semab	5406	-1.52891	1.71697	-4.55404	0.00028713	0.00804255
chr10	18539498	18546076	-	ENSMUSG00000019853.6	protein_coding	Hebp2	56016	heme binding protein 2	SOUL	3930	3.81859	-1.60738	4.6936	0.000294647	0.00822314
chr2	35558266	35730994	+	ENSMUSG00000026883.17	protein_coding	Dab2ip	69601	disabled 2 interacting protein	2310011D08Rik|AI480459|Aip1|mKIAA1743	8366	0.681376	5.11556	4.5171	0.000295067	0.00822314
chr4	48045153	48086447	+	ENSMUSG00000028341.9	protein_coding	Nr4a3	18124	nuclear receptor subfamily 4, group A, member 3	AI573420|CHN|CSMF|MINOR|NOR-1|Nor1|TEC	5987	-1.00789	2.99782	-4.51562	0.000297549	0.00827141
chr10	19591949	19610229	+	ENSMUSG00000020009.13	protein_coding	Ifngr1	15979	interferon gamma receptor 1	CD119|IFN-gammaR|Ifgr|Ifngr|Nktar	2847	-0.585736	9.08681	-4.49543	0.000306871	0.00850911
chr4	152120331	152152371	-	ENSMUSG00000028943.18	protein_coding	Espn	56226	espin	je	8272	-3.65707	-1.2402	-4.65281	0.000313299	0.00866091
chr19	23141226	23168134	+	ENSMUSG00000033863.2	protein_coding	Klf9	16601	Kruppel-like factor 9	2310051E17Rik|AA589643|BTEB-1|Bteb1|Gm9971	4815	-2.56841	-1.2124	-4.56565	0.000313915	0.00866091
chr7	24482023	24504539	+	ENSMUSG00000054793.8	protein_coding	Cadm4	260299	cell adhesion molecule 4	Igdf4c|Igsf4c|Tsll2	2161	-2.35827	-0.6526	-4.54629	0.000318076	0.00875384
chr6	84008590	84211060	+	ENSMUSG00000033788.15	protein_coding	Dysf	26903	dysferlin	2310004N10Rik|AI604795|D6Pas3	8328	-2.49066	-1.06475	-4.54758	0.000321899	0.00881568
chr17	32815449	32830261	-	ENSMUSG00000095253.4	protein_coding	Zfp799	240064	zinc finger protein 799	6030490I01Rik	6382	-0.93899	4.02631	-4.47462	0.000322454	0.00881568
chr11	118301069	118355740	-	ENSMUSG00000017466.9	protein_coding	Timp2	21858	tissue inhibitor of metalloproteinase 2	D11Bwg1104e|Timp-2	3896	-0.652199	6.23947	-4.46789	0.00032272	0.00881568
chrX	73673150	73682502	+	ENSMUSG00000019558.14	protein_coding	Slc6a8	102857	solute carrier family 6 (neurotransmitter transporter, creatine), member 8	AA589632|CRT|CRTR|CT1|CTR5|Creat	5210	-1.30208	1.65348	-4.47726	0.000324341	0.00882988
chr2	25352276	25356359	-	ENSMUSG00000026958.13	protein_coding	Dpp7	83768	dipeptidylpeptidase 7	DPPII|Dpp2|QPP	3337	-1.8257	0.246368	-4.50315	0.00032484	0.00882988
chr4	106442329	106464329	-	ENSMUSG00000044254.6	protein_coding	Pcsk9	100102	proprotein convertase subtilisin/kexin type 9	AI415265|AI747682|FH3|HCHOLA3|Narc1|PC9	3521	-1.96762	0.107243	-4.49626	0.000334136	0.00906027
chr9	62419492	62537044	-	ENSMUSG00000041729.15	protein_coding	Coro2b	235431	coronin, actin binding protein, 2B	CLIPINC|E130012P22Rik	5919	0.762125	4.84675	4.44654	0.000335768	0.00908219
chrX	161082525	161258213	+	ENSMUSG00000000037.17	protein_coding	Scml2	107815	Scm polycomb group protein like 2	4932420G07Rik	6397	-3.35505	-1.90728	-4.56808	0.000337494	0.00910656
chr8	72814599	73353540	-	ENSMUSG00000004383.18	protein_coding	Large1	16795	LARGE xylosyl- and glucuronyltransferase 1	BPFD#36|Gyltl1a|Large|Mbp-1|Mbp1|enr|fg|froggy|myd	7976	-1.75594	1.29721	-4.47279	0.000341277	0.00918618
chr7	133883199	134232146	-	ENSMUSG00000054555.11	protein_coding	Adam12	11489	a disintegrin and metallopeptidase domain 12 (meltrin alpha)	Mltna	10573	0.71499	6.33569	4.46155	0.000343119	0.00921329
chr10	127517123	127522444	-	ENSMUSG00000025403.5	protein_coding	Shmt2	108037	serine hydroxymethyltransferase 2 (mitochondrial)	2700043D08Rik|AA408223|AA986903|SHMT	3109	-0.683487	5.33275	-4.43204	0.000344607	0.00923078
chr7	118485111	118491975	-	ENSMUSG00000095115.2	protein_coding	Itpripl2	319622	inositol 1,4,5-triphosphate receptor interacting protein-like 2	C130081G24|E030018N11Rik	6865	-1.99562	-0.333819	-4.47203	0.000350539	0.00936695
chr10	117629500	117687352	+	ENSMUSG00000020183.11	protein_coding	Cpm	70574	carboxypeptidase M	1110060I01Rik|5730456K23Rik|AA589379|E030045M14Rik	5964	-1.26336	1.76422	-4.42729	0.000354539	0.00945094
chr10	18581839	18743949	-	ENSMUSG00000019852.7	protein_coding	Arfgef3	215821	ARFGEF family member 3	9630004D11|B930094H20Rik|BIG3|D10Bwg1379e|mKIAA1244	14579	0.941388	3.04053	4.40787	0.00036159	0.00961568
chr10	81204508	81230833	-	ENSMUSG00000034958.11	protein_coding	Atcay	16467	ataxia, cerebellar, Cayman type	3322401A10Rik|BB077577|BNIP-H|CLAC|hes|ji	3996	-1.98111	-0.42643	-4.45226	0.000363034	0.00963088
chr12	112678828	112682747	+	ENSMUSG00000037638.5	protein_coding	Zbtb42	382639	zinc finger and BTB domain containing 42	EG382639|Gm5188|simiRP58	3490	-1.16596	2.20774	-4.39847	0.000371513	0.00981889
chr2	57106830	57124003	-	ENSMUSG00000026826.13	protein_coding	Nr4a2	18227	nuclear receptor subfamily 4, group A, member 2	HZF-3|NOT|Nurr1|RNR-1|TINOR|TINUR	4059	-2.30549	-0.733087	-4.45881	0.000371901	0.00981889
chr9	58006411	58027023	+	ENSMUSG00000032323.13	protein_coding	Cyp11a1	13070	cytochrome P450, family 11, subfamily a, polypeptide 1	Cyp11a|Cypxia1|D9Ertd411e|P450scc|Scc|cscc	4804	-1.42001	1.07559	-4.40673	0.000372804	0.00981925
chr19	34592891	34601956	-	ENSMUSG00000079339.7	protein_coding	Ifit1bl1	667373	interferon induced protein with tetratricpeptide repeats 1B like 1	Gm14446|Ifit1c	2260	-3.74221	-1.19521	-4.59475	0.000374468	0.00983396
chr1	33719887	33742564	+	ENSMUSG00000004768.14	protein_coding	Rab23	19335	RAB23, member RAS oncogene family	AW545388|opb|opb2	8285	-1.62291	0.787445	-4.41373	0.000375145	0.00983396
chr10	57794335	57811830	+	ENSMUSG00000019872.13	protein_coding	Smpdl3a	57319	sphingomyelin phosphodiesterase, acid-like 3A	0610010C24Rik|AI529588|ASM3A|ASML3|ASML3A	2065	-1.00281	2.83328	-4.38184	0.000380068	0.00993942
chr15	84669620	84703673	+	ENSMUSG00000036106.15	protein_coding	Prr5	109270	proline rich 5 (renal)	AU043908|Arhgap8|C030017C09Rik|C78947|Protor-1|Protor1	1917	-3.55056	-2.2053	-4.50876	0.000392139	0.0102162
chr9	95399292	95406722	-	ENSMUSG00000033350.7	protein_coding	Chst2	54371	carbohydrate sulfotransferase 2	AI428561|AW121776|C130041E03Rik|Chts2|GST-2|GlcNAc6ST|Gn6st	7328	-3.63699	-1.78892	-4.52842	0.000392504	0.0102162
chr5	31054780	31078479	+	ENSMUSG00000013629.16	protein_coding	Cad	69719	carbamoyl-phosphate synthetase 2, aspartate transcarbamylase, and dihydroorotase	2410008J01Rik|AU018859|Cpad	8183	-0.746558	5.04401	-4.35883	0.000394289	0.0102385
chr6	72626378	72789254	-	ENSMUSG00000055799.13	protein_coding	Tcf7l1	21415	transcription factor 7 like 1 (T cell specific, HMG box)	Tcf-3|Tcf3|bHLHb21	3924	-1.54051	0.990612	-4.36349	0.000408386	0.0105797
chr2	164424247	164443887	-	ENSMUSG00000017009.3	protein_coding	Sdc4	20971	syndecan 4	AA959608|AW108331|S4|Synd4|ryudocan|syndecan-4	2547	-1.62545	4.35467	-5.33716	0.000413752	0.0106936
chrX	135839034	135844730	+	ENSMUSG00000072966.11	protein_coding	Gprasp2	245607	G protein-coupled receptor associated sorting protein 2	5330440H13Rik|GASP-2|GASP2|Prpl5	4540	-1.23316	2.1615	-4.33651	0.000418298	0.0107858
chr5	72603696	72644275	-	ENSMUSG00000067220.12	protein_coding	Cnga1	12788	cyclic nucleotide gated channel alpha 1	Cncg	6327	-0.782852	3.96738	-4.31415	0.00042825	0.0110032
chr6	144993835	145076184	-	ENSMUSG00000030268.17	protein_coding	Bcat1	12035	branched chain aminotransferase 1, cytosolic	BCATc|Eca39	9322	-2.15881	-0.929374	-4.3737	0.000428721	0.0110032
chr15	77583819	77596125	-	ENSMUSG00000050014.8	protein_coding	Apol10b	328561	apolipoprotein L 10B	9130218O11Rik	2325	-3.64243	-1.92446	-4.47542	0.000432839	0.0110831
chr8	122424776	122432930	-	ENSMUSG00000006519.11	protein_coding	Cyba	13057	cytochrome b-245, alpha polypeptide	b558|nmf333|p22-phox|p22phox	1039	0.675242	7.11836	4.34348	0.000434033	0.0110879
chr8	106130319	106136974	-	ENSMUSG00000084128.10	protein_coding	Esrp2	77411	epithelial splicing regulatory protein 2	9530027K23Rik|Rbm35b	4340	-0.830591	4.46234	-4.30612	0.00043524	0.0110931
chr3	98280435	98310738	+	ENSMUSG00000027875.12	protein_coding	Hmgcs2	15360	3-hydroxy-3-methylglutaryl-Coenzyme A synthase 2	1300002P16|mHS	3290	0.714945	4.54468	4.29792	0.000440985	0.0112136
chr15	97247107	97385680	+	ENSMUSG00000044250.8	protein_coding	Pced1b	239647	PC-esterase domain containing 1B	Fam113b	2197	-1.22326	2.37066	-4.30336	0.000444483	0.0112573
chr17	56751325	56757530	-	ENSMUSG00000039481.5	protein_coding	Nrtn	18188	neurturin	NTN	1023	-3.20706	-1.61329	-4.41278	0.000444741	0.0112573
chr1	152516760	152766351	-	ENSMUSG00000026482.13	protein_coding	Rgl1	19731	ral guanine nucleotide dissociation stimulator,-like 1	Rgl|mKIAA0959	6907	0.894871	3.05015	4.28161	0.000455686	0.0115079
chr8	115682942	115707794	-	ENSMUSG00000055435.6	protein_coding	Maf	17132	avian musculoaponeurotic fibrosarcoma oncogene homolog	2810401A20Rik|A230108G15Rik|AW047063|c-maf	8241	1.70251	0.460831	4.30608	0.000462107	0.011635
chr14	99870632	100284679	-	ENSMUSG00000072294.5	protein_coding	Klf12	16597	Kruppel-like factor 12	2700063E05Rik|AI225908|AI315654|AP-2rep|B130052C06Rik|D530033K05Rik	6985	-2.66972	-1.42148	-4.3629	0.000462826	0.011635
chr15	85205949	85286535	+	ENSMUSG00000006369.14	protein_coding	Fbln1	14114	fibulin 1	-	4368	-5.23897	-1.65583	-5.028	0.000480255	0.0120457
chr2	71528113	71533981	+	ENSMUSG00000041911.3	protein_coding	Dlx1	13390	distal-less homeobox 1	Dlx|Dlx-1	5396	1.73	0.121214	4.2681	0.000497619	0.0124529
chr1	71557150	71579631	+	ENSMUSG00000026192.13	protein_coding	Atic	108147	5-aminoimidazole-4-carboxamide ribonucleotide formyltransferase/IMP cyclohydrolase	2610509C24Rik|AA536954|AW212393	7985	-0.591607	6.36455	-4.2274	0.000502166	0.0125382
chr14	121952551	121965195	-	ENSMUSG00000051212.8	protein_coding	Gpr183	321019	G protein-coupled receptor 183	Ebi2	2887	-1.56317	0.637392	-4.25089	0.000504843	0.0125766
chr5	30281388	30366695	+	ENSMUSG00000073102.7	protein_coding	Drc1	381738	dynein regulatory complex subunit 1	Ccdc164|Gm1060|b2b1654Clo	2683	-2.04908	0.862076	-4.29583	0.000514227	0.0127815
chr5	123103044	123132692	-	ENSMUSG00000029449.11	protein_coding	Rhof	23912	ras homolog family member F (in filopodia)	AI845056|AV026554|Arhf|Ifld1|Rif	4602	-0.637134	5.27878	-4.21229	0.000516479	0.0128087
chr19	10717116	10739002	-	ENSMUSG00000024669.8	protein_coding	Cd5	12507	CD5 antigen	Ly-1|Ly-12|Ly-A|Lyt-1	4928	-0.615098	7.78809	-4.21549	0.000523557	0.0129472
chr10	79540245	79555199	-	ENSMUSG00000042570.14	protein_coding	Mier2	70427	MIER family member 2	2700087H15Rik|mKIAA1193	4497	-0.630787	5.36799	-4.20406	0.000524413	0.0129472
chr11	5520659	5525893	+	ENSMUSG00000020484.18	protein_coding	Xbp1	22433	X-box binding protein 1	D11Ertd39e|TREB-5|TREB5|XBP-1	3248	-0.593017	7.4119	-4.20203	0.000526345	0.012966
chr6	103510586	103750211	+	ENSMUSG00000030077.11	protein_coding	Chl1	12661	cell adhesion molecule L1-like	A530023M13Rik|AI465420|CALL|LICAM2	12293	-1.82481	0.850722	-4.22981	0.000540793	0.0132922
chr19	5473954	5482517	+	ENSMUSG00000024909.15	protein_coding	Efemp2	58859	epidermal growth factor-containing fibulin-like extracellular matrix protein 2	0610011K11Rik|Fbln4|MBP1	3788	-1.83541	-0.0604591	-4.22718	0.000543742	0.013335
chr5	37241940	37292133	+	ENSMUSG00000029121.16	protein_coding	Crmp1	12933	collapsin response mediator protein 1	CRMP-1|DRP-1|Dpysl1|ULIP-3|Ulip3	7046	-2.90955	-0.343503	-4.33861	0.000548657	0.0134257
chr10	80130451	80140835	-	ENSMUSG00000035640.18	protein_coding	Cbarp	100503659	calcium channel, voltage-dependent, beta subunit associated regulatory protein	9630008F14|Dos|R29144/1	4996	-1.43529	1.76297	-4.19582	0.000553011	0.0135023
chr7	19176421	19206482	+	ENSMUSG00000040811.15	protein_coding	Eml2	72205	echinoderm microtubule associated protein like 2	1600029N02Rik|EMAP-2	3529	-1.01598	2.73151	-4.1746	0.000558058	0.0135954
chr2	20847919	20968881	-	ENSMUSG00000036591.16	protein_coding	Arhgap21	71435	Rho GTPase activating protein 21	5530401C11Rik|AA416458|ARHGAP10	9271	-0.959601	3.01565	-4.17179	0.000559741	0.0136064
chr10	19000910	19015657	-	ENSMUSG00000019850.11	protein_coding	Tnfaip3	21929	tumor necrosis factor, alpha-induced protein 3	A20|Tnfip3	7226	0.532106	7.99372	4.15615	0.000573134	0.0139013
chr4	124700701	124708611	+	ENSMUSG00000032643.12	protein_coding	Fhl3	14201	four and a half LIM domains 3	SLIM2	1683	-0.721559	4.10257	-4.14006	0.000590906	0.014301
chr3	80681450	80802835	-	ENSMUSG00000033981.14	protein_coding	Gria2	14800	glutamate receptor, ionotropic, AMPA2 (alpha 2)	GluA2|GluR-B|Glur-2|Glur2|gluR-K2	15548	-1.18882	1.77776	-4.14248	0.000598341	0.0144253
chr17	73883895	73950196	-	ENSMUSG00000024066.9	protein_coding	Xdh	22436	xanthine dehydrogenase	XO|Xor|Xox-1|Xox1	9175	-1.16886	1.96183	-4.1407	0.00059953	0.0144253
chr11	94343295	94392997	-	ENSMUSG00000020865.16	protein_coding	Abcc3	76408	ATP-binding cassette, sub-family C (CFTR/MRP), member 3	1700019L09Rik|ABC31|MLP2|MOAT-D|MRP3	5698	1.69601	0.611413	4.16514	0.000601555	0.0144253
chr8	88521354	88594884	+	ENSMUSG00000031661.12	protein_coding	Nkd1	93960	naked cuticle 1	2810434J10Rik|9030215G15Rik|Nkd	4558	-3.16126	-2.00256	-4.24997	0.000601778	0.0144253
chr3	144188530	144205220	-	ENSMUSG00000028266.17	protein_coding	Lmo4	16911	LIM domain only 4	A730077C12Rik|Crp3|Etohi4	3530	-0.651126	5.76475	-4.12934	0.000602578	0.0144253
chr13	51685529	51793747	-	ENSMUSG00000021451.16	protein_coding	Sema4d	20354	sema domain, immunoglobulin domain (Ig), transmembrane domain (TM) and short cytoplasmic domain, (semaphorin) 4D	CD100|Semacl2|Semaj|Semcl2|coll-4	7679	-0.539553	8.97573	-4.12194	0.000610817	0.0145909
chr16	49699233	49765126	+	ENSMUSG00000032965.11	protein_coding	Ift57	73916	intraflagellar transport 57	4833420A15Rik|Esrrbl1|Hippi|MHS4R2	2862	0.639575	5.28764	4.12042	0.000612651	0.0146031
chrX	136066564	136068236	-	ENSMUSG00000042750.7	protein_coding	Bex2	12069	brain expressed X-linked 2	AL024066|Bex1	903	-2.08914	-0.188917	-4.15823	0.000637967	0.0151441
chr2	72476159	72486893	+	ENSMUSG00000055612.15	protein_coding	Cdca7	66953	cell division cycle associated 7	2310021G01Rik|AU044109|JPO1	3202	0.501264	9.2805	4.0985	0.000638093	0.0151441
chr8	84911903	84937359	-	ENSMUSG00000053693.16	protein_coding	Mast1	56527	microtubule associated serine/threonine kinase 1	9430008B02Rik|SAST|SAST170	6459	-2.22667	-0.5553	-4.15592	0.0006512	0.015422
chr6	48840919	48847071	+	ENSMUSG00000023367.14	protein_coding	Tmem176a	66058	transmembrane protein 176A	0610011I04Rik|AU040201|AU041743|Keg2	3810	-0.896621	3.38409	-4.08532	0.000656423	0.0155124
chr7	143778363	143784500	-	ENSMUSG00000048965.9	protein_coding	Mrgpre	244238	MAS-related GPR, member E	C130069N09Rik|Ebrt3|Mgrf|MrgE	3761	-0.857391	4.01182	-4.07478	0.00066922	0.015781
chr13	34977748	35027096	-	ENSMUSG00000021417.15	protein_coding	Eci2	23986	enoyl-Coenzyme A delta isomerase 2	Acbd2|Drs1|Hca88|Peci	5540	0.652998	7.29858	4.11177	0.00067635	0.0158638
chr1	14168954	14310235	-	ENSMUSG00000025932.14	protein_coding	Eya1	14048	EYA transcriptional coactivator and phosphatase 1	bor	7808	2.85108	-1.919	4.17175	0.000676847	0.0158638
chr16	95702075	95721051	+	ENSMUSG00000022895.16	protein_coding	Ets2	23872	E26 avian leukemia oncogene 2, 3' domain	AU022856|Ets-2	5780	-0.521772	10.3254	-4.06667	0.000677175	0.0158638
chr17	79333727	79355091	-	ENSMUSG00000036533.9	protein_coding	Cdc42ep3	260409	CDC42 effector protein (Rho GTPase binding) 3	3200001F04Rik|AA986861|Borg2|Cep3|UB1	2309	0.636685	5.23551	4.06525	0.000679091	0.0158638
chr17	18914300	18958087	+	ENSMUSG00000091491.2	protein_coding	Vmn2r97	627367	vomeronasal 2, receptor 97	EG627367|Vn2r97	14819	-2.78108	2.59127	-5.20384	0.000679917	0.0158638
chr1	173468485	173491041	-	ENSMUSG00000037849.8	protein_coding	Ifi206	102639543	interferon activated gene 206	EG240921|Gm4955|Pyblhin-C	3054	-1.4398	0.863133	-4.0828	0.00068374	0.0159193
chr5	92226679	92256278	-	ENSMUSG00000029410.11	protein_coding	Ppef2	19023	protein phosphatase, EF hand calcium-binding domain 2	-	2983	1.09668	1.90694	4.06394	0.000689162	0.0160118
chr2	168081004	168101203	+	ENSMUSG00000044641.7	protein_coding	Pard6b	58220	par-6 family cell polarity regulator beta	AV025615|Par6b	3399	-1.41071	1.24388	-4.07208	0.000695722	0.0161302
chr12	98676741	98737405	-	ENSMUSG00000021009.15	protein_coding	Ptpn21	24000	protein tyrosine phosphatase, non-receptor type 21	PTPD1|PTPRL10	7897	-1.69655	-0.163919	-4.08273	0.000702978	0.0162643
chr1	156310727	156328035	+	ENSMUSG00000026602.9	protein_coding	Nphs2	170484	nephrosis 2, podocin	PDCN|SRN1	3116	-0.873146	4.91505	-4.14355	0.000706778	0.016318
chr4	146891696	146909590	-	ENSMUSG00000045699.4	protein_coding	Gm21411	102632316	predicted gene, 21411	-	1460	2.32752	-1.30828	4.11732	0.000709054	0.0163364
chr16	19760208	19772753	+	ENSMUSG00000022686.14	protein_coding	B3gnt5	108105	UDP-GlcNAc:betaGal beta-1,3-N-acetylglucosaminyltransferase 5	beta3GnT5	5197	0.84631	3.96752	4.03469	0.000721176	0.016581
chr6	113483297	113493343	+	ENSMUSG00000030284.11	protein_coding	Creld1	171508	cysteine-rich with EGF-like domains 1	AI843811|i11E7	4251	0.70531	4.31293	4.03094	0.000724366	0.0166198
chr10	7589800	7625483	+	ENSMUSG00000019796.12	protein_coding	Lrp11	237253	low density lipoprotein receptor-related protein 11	1700034J19Rik|6330533B21|9830160H19Rik	3418	-2.26942	-1.31472	-4.09959	0.000728478	0.0166794
chr8	84699876	84800344	-	ENSMUSG00000001911.16	protein_coding	Nfix	18032	nuclear factor I/X	CTF|NF-I/X|NF1-X|NFI-X	7351	-1.0459	2.34483	-4.02792	0.000735319	0.0167562
chr5	43818885	43843986	+	ENSMUSG00000029082.17	protein_coding	Bst1	12182	bone marrow stromal cell antigen 1	114/A10|A530073F09|BP-3|Bp3|Bsta1|CD157|Ly65	3317	-3.16277	-2.11695	-4.14545	0.000736022	0.0167562
chr13	96924689	96950906	+	ENSMUSG00000091387.2	protein_coding	Gcnt4	218476	glucosaminyl (N-acetyl) transferase 4, core 2 (beta-1,6-N-acetylglucosaminyltransferase)	C2gnt3|Gm279|Gm73	5087	1.38393	1.49197	4.03973	0.000737641	0.0167562
chr10	4266380	4359470	+	ENSMUSG00000038587.9	protein_coding	Akap12	83397	A kinase (PRKA) anchor protein (gravin) 12	AI317366|SSeCKS|Srcs5|Tsga12	6461	0.733579	6.94999	4.22482	0.000737905	0.0167562
chr4	149586468	149648899	+	ENSMUSG00000039953.13	protein_coding	Clstn1	65945	calsyntenin 1	1810034E21Rik|Cst-1|Cstn1	4662	-1.33652	1.75911	-4.03377	0.000742713	0.0168308
chr1	156255296	156303664	-	ENSMUSG00000060985.15	protein_coding	Tdrd5	214575	tudor domain containing 5	Gm103	6937	0.66635	8.28382	4.12442	0.000755799	0.0170922
chr14	18573575	18894267	-	ENSMUSG00000058317.12	protein_coding	Ube2e2	218793	ubiquitin-conjugating enzyme E2E 2	BC016265	4628	-2.31397	0.28956	-4.10589	0.000766463	0.0172979
chr5	129654593	129670099	-	ENSMUSG00000051034.7	protein_coding	Zfp11	22648	zinc finger protein 11	6720465D24|Krox-6|Zfp-11	3929	-1.40055	1.06711	-3.99787	0.000799721	0.0180117
chr4	114906282	114908873	-	ENSMUSG00000055210.4	protein_coding	Foxd2	17301	forkhead box D2	AI426778|Mf2	2592	-1.22698	1.40452	-3.98693	0.000803875	0.0180684
chr7	25461707	25477603	-	ENSMUSG00000074272.10	protein_coding	Ceacam1	26365	carcinoembryonic antigen-related cell adhesion molecule 1	Bgp|Bgp1|C-CAM|CD66a|Cc1|Cea-1|Cea-7|Cea1|Cea7|Hv-2|Hv2|MHVR|MHVR1|Mhv-1|bb-1|mCEA1|mmCGM1|mmCGM1a|mmCGM2	5806	-1.14152	2.06329	-3.97589	0.000815657	0.0182959
chr2	140395309	142392966	+	ENSMUSG00000068205.14	protein_coding	Macrod2	72899	MACRO domain containing 2	1110033L15Rik|2610107G07Rik|2900006F19Rik	10308	-2.69893	0.345252	-4.25242	0.000823014	0.0184235
chr9	118606690	118901003	+	ENSMUSG00000039115.13	protein_coding	Itga9	104099	integrin alpha 9	(alpha)9|2610002H11Rik|6720458D17Rik|AI461869|D130073C02|D9Ertd428e	7691	-1.49594	0.673868	-3.97835	0.000838071	0.0187226
chr17	80523550	80577813	-	ENSMUSG00000033966.8	protein_coding	Cdkl4	381113	cyclin-dependent kinase-like 4	AU067824|Gm942	3341	-2.24684	-1.02651	-4.02247	0.000841895	0.01877
chr13	23751126	23751598	+	ENSMUSG00000061615.2	protein_coding	Hist1h2ab	319172	histone cluster 1, H2ab	H2A.1|H2a-53	473	1.72273	-0.0724895	3.98662	0.000846456	0.0188336
chr1	164437109	164458355	-	ENSMUSG00000026576.12	protein_coding	Atp1b1	11931	ATPase, Na+/K+ transporting, beta 1 polypeptide	Atp4b|Atpb|Atpb-1|NKbeta1	3081	0.522671	7.25256	3.94333	0.000853303	0.0189478
chr11	99385254	99389364	-	ENSMUSG00000019761.10	protein_coding	Krt10	16661	keratin 10	D130054E02Rik|K10|K1C1|Krt-1.10|Krt1-10	2114	-1.50561	0.401014	-3.95369	0.000879217	0.019484
chr19	61223957	61228429	-	ENSMUSG00000059326.7	protein_coding	Csf2ra	12982	colony stimulating factor 2 receptor, alpha, low-affinity (granulocyte-macrophage)	CD116|Csfgmra|GM-CSF-Ra|GM-CSFR	2871	-1.27678	1.24072	-3.94011	0.000882008	0.0195067
chr15	84553398	84557823	-	ENSMUSG00000055745.4	protein_coding	Rtl6	223732	retrotransposon Gag like 6	BC058638|Ldoc1l|Mar6|Mart6	4426	-0.816859	5.45174	-4.06569	0.00088947	0.0196324
chr3	116859464	116908177	+	ENSMUSG00000033386.10	protein_coding	Frrs1	20321	ferric-chelate reductase 1	AI131732|Sdfr2	7260	-0.763242	4.54989	-3.91618	0.00089963	0.019817
chr12	98268635	98276644	+	ENSMUSG00000021886.7	protein_coding	Gpr65	14744	G-protein coupled receptor 65	Dig1|Gpcr25|TDAG8	2069	-0.922656	2.99799	-3.91464	0.00090522	0.0199004
chr12	81721010	81781175	-	ENSMUSG00000042724.8	protein_coding	Map3k9	338372	mitogen-activated protein kinase kinase kinase 9	E130314H24Rik|Mlk1|Prke1	5902	-2.3403	-0.641078	-3.98504	0.000914599	0.0200324
chr10	92775619	93081618	-	ENSMUSG00000020014.17	protein_coding	Cfap54	380654	cilia and flagella associated protein 54	4930485B16Rik|Gm872	14645	-2.8496	-1.63099	-4.01416	0.000914852	0.0200324
chr14	25711642	25769039	-	ENSMUSG00000055538.7	protein_coding	Zcchc24	71918	zinc finger, CCHC domain containing 24	2310047A01Rik	4557	0.577841	6.45414	3.90437	0.000918248	0.0200669
chr16	4594713	4624924	+	ENSMUSG00000014303.13	protein_coding	Glis2	83396	GLIS family zinc finger 2	Gli5|Klf16|Nkl	4373	-1.32865	1.54754	-3.91517	0.000929136	0.0202647
chr16	23224740	23360350	+	ENSMUSG00000022885.16	protein_coding	St6gal1	20440	beta galactoside alpha 2,6 sialyltransferase 1	AW742324|Siat1|St6Gal-I|St6gal|St6galI	4916	-0.57071	6.41351	-3.89517	0.000934287	0.0203369
chr5	36806921	36830653	-	ENSMUSG00000029119.9	protein_coding	Man2b2	17160	mannosidase 2, alpha B2	mKIAA0935	3528	-0.619166	4.98532	-3.88975	0.000943972	0.0205072
chr3	51224447	51251644	+	ENSMUSG00000023087.15	protein_coding	Noct	12457	nocturnin	AU043840|Ccr4|Ccrn4l	10658	-0.756536	4.49254	-3.88914	0.000946039	0.0205118
chr7	16944682	16948828	+	ENSMUSG00000070802.5	protein_coding	Pnmal2	434128	PNMA-like 2	EG434128	4147	-1.03365	3.32319	-3.90879	0.000952501	0.0205925
chr9	124101950	124113557	+	ENSMUSG00000049103.14	protein_coding	Ccr2	12772	chemokine (C-C motif) receptor 2	Cc-ckr-2|Ccr2a|Ccr2b|Ckr2|Ckr2a|Ckr2b|Cmkbr2|mJe-r	6760	-3.43682	-1.25946	-4.0969	0.000953495	0.0205925
chr16	37916496	38007530	+	ENSMUSG00000046961.8	protein_coding	Gpr156	239845	G protein-coupled receptor 156	Gababl	4584	-2.84733	-2.28415	-3.99099	0.000956335	0.0206135
chr3	89146074	89160196	-	ENSMUSG00000028051.10	protein_coding	Hcn3	15168	hyperpolarization-activated, cyclic nucleotide-gated K+ 3	BCNG-4|Bcng4|Hac3|Hcn4	4154	-0.971125	2.21092	-3.88293	0.000962949	0.0207156
chr8	35375739	35388139	+	ENSMUSG00000046794.9	protein_coding	Ppp1r3b	244416	protein phosphatase 1, regulatory subunit 3B	6430576E21|AW821953|GL|PTG	6216	-0.502956	7.0574	-3.87639	0.00096792	0.020782
chr14	54567472	54577558	-	ENSMUSG00000022178.11	protein_coding	Ajuba	16475	ajuba LIM protein	Jub	3646	-1.29944	1.48366	-3.88425	0.000982714	0.0210587
chr3	37714190	37724490	-	ENSMUSG00000058174.7	protein_coding	Gm5148	381438	predicted gene 5148	EG381438	3901	1.90869	0.359781	3.91646	0.00100477	0.0214896
chr9	106152857	106158138	-	ENSMUSG00000020258.16	protein_coding	Glyctk	235582	glycerate kinase	6230410P16Rik|C430006L12	4229	-1.05127	3.12552	-3.86539	0.00101615	0.0216909
chr2	135659011	136014593	+	ENSMUSG00000039943.16	protein_coding	Plcb4	18798	phospholipase C, beta 4	A930039J07Rik|AI854601|C230058B11Rik	8970	-1.19099	2.10679	-3.8594	0.0010207	0.021746
chr10	80948624	81014945	-	ENSMUSG00000048240.14	protein_coding	Gng7	14708	guanine nucleotide binding protein (G protein), gamma 7	AI840417	3786	-2.29538	-1.30262	-3.91827	0.00103452	0.021998
chr2	152411955	152415027	-	ENSMUSG00000074682.4	protein_coding	Zcchc3	67917	zinc finger, CCHC domain containing 3	2810406K24Rik	3073	-2.27775	-1.25029	-3.91428	0.00104031	0.0220786
chr17	13760539	13906150	+	ENSMUSG00000068036.15	protein_coding	Afdn	17356	afadin, adherens junction formation factor	5033403D15Rik|AF6|Af-6|Afadin|Gm314|I-afadin|Mllt4|S-afadin	10223	-1.31453	1.89951	-3.84974	0.00105155	0.0222652
chr9	51943306	51963556	-	ENSMUSG00000032051.9	protein_coding	Fdx1	14148	ferredoxin 1	-	3104	0.676461	3.9991	3.83191	0.00105314	0.0222652
chr19	40894705	40917947	+	ENSMUSG00000049164.7	protein_coding	Zfp518a	72672	zinc finger protein 518A	2810401C22Rik|6330417C12Rik|AI426493|Zfp518|Znf518|Znf518a|mKIAA0335	6840	-0.613273	5.61335	-3.81347	0.00109016	0.0230039
chr5	107402736	107430035	+	ENSMUSG00000033805.12	protein_coding	Ephx4	384214	epoxide hydrolase 4	Abhd7|Ephxrp|Gm1382	1646	1.58555	2.16082	4.02493	0.0010942	0.0230451
chr14	105891947	105896819	-	ENSMUSG00000022114.5	protein_coding	Spry2	24064	sprouty RTK signaling antagonist 2	sprouty2	2087	-1.99622	-0.449425	-3.8682	0.00109841	0.0230897
chr10	75923222	75936496	-	ENSMUSG00000000901.17	protein_coding	Mmp11	17385	matrix metallopeptidase 11	MMP-11|SL-3|ST3|Stmy3	2778	-3.19141	0.147022	-4.25053	0.00110649	0.0232152
chrX	153685154	153696391	-	ENSMUSG00000041633.14	protein_coding	Kctd12b	207474	potassium channel tetramerisation domain containing 12b	9530071H11Rik|B430319H24Rik	4906	-2.71085	-1.81806	-3.90674	0.00110912	0.0232262
chr19	11516512	11531256	+	ENSMUSG00000024677.13	protein_coding	Ms4a6b	69774	membrane-spanning 4-domains, subfamily A, member 6B	1810027D10Rik	4485	-0.807112	4.60032	-3.81882	0.0011204	0.0234181
chr3	95139521	95142360	-	ENSMUSG00000013707.3	protein_coding	Tnfaip8l2	69769	tumor necrosis factor, alpha-induced protein 8-like 2	1810019A08Rik|AW610835|TIPE2	1122	-0.856404	3.83472	-3.78511	0.00115465	0.0240344
chr10	127055011	127060184	-	ENSMUSG00000040502.5	protein_coding	2009-03-01	216438	membrane-associated ring finger (C3HC4) 9	AI608492|BC019560	3037	-1.39708	2.44623	-3.89826	0.00115729	0.0240344
chr10	79526430	79533796	-	ENSMUSG00000052151.12	protein_coding	Plpp2	50784	phospholipid phosphatase 2	Lpp2|PAP2-G|PAP2-gamma|PAP2c|Ppap2c	1654	-2.46002	-1.88399	-3.87008	0.00115771	0.0240344
chr11	5106265	5152257	-	ENSMUSG00000034164.17	protein_coding	Emid1	140703	EMI domain containing 1	AW122071|CO-5|Emu1	2890	0.533987	6.64279	3.78123	0.0011586	0.0240344
chr1	15853862	15892722	-	ENSMUSG00000032719.4	protein_coding	Sbspon	226866	somatomedin B and thrombospondin, type 1 domain containing	Gm106|Rpesp	2748	-3.27507	-1.93736	-3.93067	0.00116677	0.0241585
chr4	149518236	149566437	+	ENSMUSG00000028988.13	protein_coding	Ctnnbip1	67087	catenin beta interacting protein 1	1110008O09Rik|2310001I19Rik|AW457332|Catnbip1|Icat	2792	0.684162	4.17815	3.77629	0.00117005	0.024181
chr1	154390731	154884501	-	ENSMUSG00000004110.17	protein_coding	Cacna1e	12290	calcium channel, voltage-dependent, R type, alpha 1E subunit	A430040I15|BII|Cach6|Cacnl1a6|Cav2.3|Cchra1|alpha1E	25228	-4.49024	3.86491	-6.33514	0.00117853	0.0243109
chr13	120300392	120308779	+	ENSMUSG00000094796.2	protein_coding	BC147527	625360	cDNA sequence BC147527	-	1595	-0.846567	4.25078	-3.79036	0.00118291	0.0243556
chr13	54949411	55006018	+	ENSMUSG00000025876.15	protein_coding	Unc5a	107448	unc-5 netrin receptor A	Unc5h1|mKIAA1976	4168	-1.6919	0.0239355	-3.80394	0.00119687	0.0245971
chr11	70540064	70558110	+	ENSMUSG00000020828.13	protein_coding	Pld2	18806	phospholipase D2	PLD1C	6252	-1.51895	0.255041	-3.78023	0.00122695	0.0251684
chrX	153723590	153741920	+	ENSMUSG00000086316.8	protein_coding	Nbdy	70123	negative regulator of P-body association	2210013O21Rik|AI181827|Thp5	1971	-0.655585	4.49001	-3.74974	0.00123019	0.0251882
chr1	89070415	89155068	+	ENSMUSG00000036206.12	protein_coding	Sh3bp4	98402	SH3-domain binding protein 4	AI594717|AW227605|BOG25	5112	-1.4602	1.19876	-3.77321	0.0012353	0.0252458
chr7	143458339	143461050	-	ENSMUSG00000037664.13	protein_coding	Cdkn1c	12577	cyclin-dependent kinase inhibitor 1C (P57)	AL024410|CDKI|Kip2|p57(kip2)|p57Kip2	2039	-1.19612	1.23354	-3.74917	0.0012598	0.0256991
chr4	33208991	33233340	+	ENSMUSG00000054679.8	protein_coding	Srsf12	272009	serine/arginine-rich splicing factor 12	B830039L16|Sfrs13b|Srrp|Srsf13b	3148	-1.45177	0.373855	-3.7508	0.00128841	0.026234
chr5	21424958	21482124	+	ENSMUSG00000047221.5	protein_coding	Fam185a	330050	family with sequence similarity 185, member A	4631428I10|AI847670	3894	-1.18697	1.33921	-3.72244	0.00132484	0.0269263
chr13	75706757	75772364	+	ENSMUSG00000001542.7	protein_coding	Ell2	192657	elongation factor RNA polymerase II 2	-	9828	-1.94625	-0.448574	-3.76116	0.00134245	0.027234
chr17	35517100	35531015	+	ENSMUSG00000040312.14	protein_coding	Cchcr1	240084	coiled-coil alpha-helical rod protein 1	Hcr	5508	0.711728	4.57608	3.69806	0.00135759	0.0274905
chr19	41862851	41896173	-	ENSMUSG00000035049.4	protein_coding	Rrp12	107094	ribosomal RNA processing 12 homolog (S. cerevisiae)	AA408556|AA536972|mKIAA0690	4340	-0.936685	2.88932	-3.69693	0.00136851	0.0276609
chr7	118972047	118995211	-	ENSMUSG00000008734.9	protein_coding	Gprc5b	64297	G protein-coupled receptor, family C, group 5, member B	AW125761|Raig2	4630	-1.0833	2.92111	-3.714	0.00138182	0.027879
chr5	110110092	110129794	+	ENSMUSG00000023284.15	protein_coding	Zfp605	675812	zinc finger protein 605	A830023I12Rik	3497	-1.15219	2.65972	-3.71364	0.00139011	0.027995
chr2	62595798	62646255	-	ENSMUSG00000026896.14	protein_coding	Ifih1	71586	interferon induced with helicase C domain 1	9130009C22Rik|Helicard|Hlcd|MDA5|RLR-2	8165	0.82015	3.27723	3.68476	0.001395	0.0280423
chr2	127456498	127522094	-	ENSMUSG00000079056.12	protein_coding	Kcnip3	56461	Kv channel interacting protein 3, calsenilin	4933407H12Rik|AI413860|Csen|DREAM|KChIP3|R74849	3546	1.05536	1.73327	3.6867	0.00140453	0.0281826
chr10	75943057	75949657	+	ENSMUSG00000000903.3	protein_coding	Vpreb3	22364	pre-B lymphocyte gene 3	8HS-20|AI528709|Vpreb-3	859	-3.25847	-1.2768	-3.87675	0.00141245	0.0282901
chr9	118926453	119043998	+	ENSMUSG00000047409.13	protein_coding	Ctdspl	69274	CTD (carboxy-terminal domain, RNA polymerase II, polypeptide A) small phosphatase-like	2810418J22Rik|AI426263|HYA22|SCP3	5190	-0.90645	3.51477	-3.685	0.0014151	0.0282917
chr5	120680202	120711927	-	ENSMUSG00000029603.15	protein_coding	Dtx1	14357	deltex 1, E3 ubiquitin ligase	Fxit1|mKIAA4160	5270	1.28446	5.60484	4.65622	0.00143036	0.0285451
chr8	84338639	84640246	+	ENSMUSG00000034656.18	protein_coding	Cacna1a	12286	calcium channel, voltage-dependent, P/Q type, alpha 1A subunit	APCA|BI|Caca1a|Cacnl1a4|Cav2.1|Ccha1a|EA2|FHM|HPCA|MHP|MHP1|SCA6|alpha1A|la|nmf352|rkr|smrl|tg	12310	-1.49871	0.919792	-3.69516	0.0014419	0.0287236
chr3	89377644	89394776	-	ENSMUSG00000028042.15	protein_coding	Zbtb7b	22724	zinc finger and BTB domain containing 7B	Thpok|Zfp67|c-Krox	5591	-1.91115	-0.238513	-3.71773	0.00145392	0.0289108
chr9	42963842	43107239	-	ENSMUSG00000059495.14	protein_coding	Arhgef12	69632	Rho guanine nucleotide exchange factor (GEF) 12	2310014B11Rik|AU019857|Larg|mKIAA0382	13620	-1.31426	1.2015	-3.67578	0.00146627	0.0291039
chr14	47153895	47189413	-	ENSMUSG00000037580.10	protein_coding	Gch1	14528	GTP cyclohydrolase 1	GTP-CH|GTP-CH-I|GTPCH|Gch	6251	0.643791	4.37656	3.65626	0.00146907	0.0291072
chr10	81574561	81590845	+	ENSMUSG00000034771.15	protein_coding	Tle2	21886	transducin-like enhancer of split 2	Grg2|mKIAA4188	6221	-0.755766	4.59782	-3.65598	0.00149279	0.0295241
chr1	189728268	189876695	+	ENSMUSG00000026604.17	protein_coding	Ptpn14	19250	protein tyrosine phosphatase, non-receptor type 14	C130080N23Rik|PTP36	13413	-0.545366	6.48023	-3.64444	0.00150207	0.0296545
chr5	140607320	140615545	+	ENSMUSG00000029570.5	protein_coding	Lfng	16848	LFNG O-fucosylpeptide 3-beta-N-acetylglucosaminyltransferase	AW061165	2505	-1.59545	-0.175302	-3.67739	0.00150996	0.029714
chr11	101170523	101190724	+	ENSMUSG00000017167.6	protein_coding	Cntnap1	53321	contactin associated protein-like 1	AI841080|Caspr|NCP1|Nrxn4|p190|shm	5875	-2.67614	-1.1167	-3.75438	0.00151047	0.029714
chr3	88043108	88055993	+	ENSMUSG00000028069.16	protein_coding	Gpatch4	66614	G patch domain containing 4	2610029K21Rik|Gpatc4	2447	-0.865489	2.80591	-3.63572	0.00153361	0.0301124
chr7	68236610	68264233	-	ENSMUSG00000030553.3	protein_coding	Pgpep1l	78444	pyroglutamyl-peptidase I-like	C330024D12Rik	1006	1.46195	0.862775	3.6601	0.00153618	0.0301124
chr1	89454806	89897617	+	ENSMUSG00000055013.15	protein_coding	Agap1	347722	ArfGAP with GTPase domain, ankyrin repeat and PH domain 1	Centg2|Ggap1|R75364|mKIAA1099	17559	-2.92859	-0.759226	-3.83501	0.00155095	0.0303464
chr15	50654752	50890463	-	ENSMUSG00000038679.16	protein_coding	Trps1	83925	transcriptional repressor GATA binding 1	AI115454|AI447310|D15Ertd586e	13380	-0.783348	4.17107	-3.628	0.00155362	0.0303464
chr18	37806364	37841873	+	ENSMUSG00000102918.1	protein_coding	Pcdhgc3	93706	protocadherin gamma subfamily C, 3	PC43|Pcdh2	5499	0.998589	2.04141	3.62153	0.00158528	0.0309101
chr17	47505051	47599691	+	ENSMUSG00000034165.16	protein_coding	Ccnd3	12445	cyclin D3	9230106B05Rik|AA682053|AL024085|AW146355|C78795	8775	0.52647	10.9724	3.61427	0.00159081	0.0309634
chr17	36954356	36958559	-	ENSMUSG00000036315.13	protein_coding	Znrd1	66136	zinc ribbon domain containing 1	1110014N07Rik|Rpa12	819	-0.69165	5.15652	-3.61634	0.00160787	0.0311836
chr7	82173840	82307419	+	ENSMUSG00000030638.13	protein_coding	Sh3gl3	20408	SH3-domain GRB2-like 3	EEN-B2|SH3P13|Sh3d2c|Sh3d2c2	4319	-1.56086	0.135479	-3.64238	0.0016089	0.0311836
chr3	155084918	155093403	-	ENSMUSG00000053870.7	protein_coding	Fpgt	75540	fucose-1-phosphate guanylyltransferase	1700016E03Rik	6282	-0.708516	3.87382	-3.60822	0.00161061	0.0311836
chr10	81590904	81601073	-	ENSMUSG00000034758.12	protein_coding	Tle6	114606	transducin-like enhancer of split 6	1810057E06Rik|Grg6	3088	-0.968428	3.0638	-3.60599	0.00163415	0.031584
chr4	156199455	156200796	-	ENSMUSG00000035692.7	protein_coding	Isg15	100038882	ISG15 ubiquitin-like modifier	G1p2|IGI15|IP17|Irfp|UCRP	703	1.04098	2.07743	3.6033	0.00164589	0.0317333
chr4	150914562	150946102	+	ENSMUSG00000028965.13	protein_coding	Tnfrsf9	21942	tumor necrosis factor receptor superfamily, member 9	4-1BB|A930040I11Rik|AA408498|AI325004|CDw137|Cd137|ILA|Ly63	2722	-1.9425	-0.838031	-3.65554	0.00164762	0.0317333
chrX	36195904	36199158	+	ENSMUSG00000036699.12	protein_coding	Zcchc12	72693	zinc finger, CCHC domain containing 12	2810028A01Rik|AV136720|Sizn1	2280	-0.976227	2.39679	-3.5982	0.00165555	0.0318303
chr14	70217865	70289471	-	ENSMUSG00000022092.11	protein_coding	Ppp3cc	19057	protein phosphatase 3, catalytic subunit, gamma isoform	Calnc|PP2BA gamma	2985	-1.14414	2.2831	-3.60354	0.00165872	0.0318359
chr5	130073326	130135729	+	ENSMUSG00000034118.15	protein_coding	Tpst1	22021	protein-tyrosine sulfotransferase 1	R75054|Tango13a	2789	-0.965643	2.89955	-3.59387	0.00166837	0.0319655
chr11	101458745	101466230	-	ENSMUSG00000034993.7	protein_coding	Vat1	26949	vesicle amine transport 1	VAT-1	2766	-0.680043	4.78836	-3.58846	0.00167197	0.031979
chr18	61045150	61085061	+	ENSMUSG00000024620.11	protein_coding	Pdgfrb	18596	platelet derived growth factor receptor, beta polypeptide	AI528809|CD140b|PDGFR-1|Pdgfr	5478	0.994068	1.98566	3.59032	0.0016824	0.0321228
chr3	100451628	100489324	-	ENSMUSG00000044468.14	protein_coding	Tent5c	74645	terminal nucleotidyltransferase 5C	4930431B09Rik|AI449797|Fam46c	6097	-1.07058	1.76394	-3.58542	0.00170677	0.0325275
chr7	6343759	6355956	+	ENSMUSG00000109398.2	protein_coding	Gm3854	100416477	zinc finger protein 72 pseudogene	100042459	3908	-2.58424	-2.07321	-3.67729	0.00170949	0.0325275
chr7	17031507	17062427	-	ENSMUSG00000004328.15	protein_coding	Hif3a	53417	hypoxia inducible factor 3, alpha subunit	Ipas|MOP7|NEPAS|bHLHe17	6710	-1.51415	0.814258	-3.59898	0.00173994	0.0330499
chr1	55405921	55754285	+	ENSMUSG00000038349.10	protein_coding	Plcl1	227120	phospholipase C-like 1	C230017K02Rik|PLC-L|PLC-L1|PLCE|PLCL|PLDL1|PRIP|PRIP-1	6687	0.632468	5.93076	3.5618	0.0017934	0.0340068
chr17	35655634	35667592	-	ENSMUSG00000038838.15	protein_coding	Vars2	68915	valyl-tRNA synthetase 2, mitochondrial	1190004I24Rik|Vars2l|mKIAA1885	5460	0.509509	7.36567	3.54847	0.00180339	0.0341376
chr9	108096022	108190384	-	ENSMUSG00000032589.14	protein_coding	Bsn	12217	bassoon	-	15938	-0.997508	2.37957	-3.54735	0.00182714	0.0345279
chr10	18318985	18533892	+	ENSMUSG00000039835.16	protein_coding	Nhsl1	215819	NHS-like 1	5730409E15Rik|A630035H13Rik|A730096F01|BC013565|D10Bwg0940e|mKIAA1357	11348	0.59558	6.91035	3.54394	0.00187413	0.0353553
chr3	93520488	93526287	+	ENSMUSG00000027907.4	protein_coding	S100a11	20195	S100 calcium binding protein A11	EMAPI|Emap1|S100a14|S100c|cal	511	-1.16801	1.10876	-3.53238	0.00190505	0.0358773
chr7	28267881	28269272	+	ENSMUSG00000046058.7	protein_coding	Eid2	386655	EP300 interacting inhibitor of differentiation 2	Cri2|EID-2	1392	-1.52837	0.413673	-3.54564	0.0019332	0.0363455
chr7	27486910	27490316	+	ENSMUSG00000008384.8	protein_coding	Sertad1	55942	SERTA domain containing 1	1110032C13Rik|AV000455|AW456625|Sei-1|Sei1|TRIP-Br1	1344	0.63962	5.23858	3.50971	0.00194337	0.0364745
chr11	60788104	60811718	-	ENSMUSG00000020534.14	protein_coding	Shmt1	20425	serine hydroxymethyltransferase 1 (soluble)	AI324848|AI385541|C81125|Shmt|mshmt|mshmt1|mshmt2	3883	-0.727357	3.79988	-3.50112	0.00197643	0.037032
chr17	27655509	27711482	+	ENSMUSG00000040276.15	protein_coding	Pacsin1	23969	protein kinase C and casein kinase substrate in neurons 1	A830061D09Rik|H74|mKIAA1379|syndapin	6525	-0.833066	3.06608	-3.49568	0.00200199	0.0374474
chr13	95601803	95618487	-	ENSMUSG00000048376.6	protein_coding	F2r	14062	coagulation factor II (thrombin) receptor	AI482343|Cf2r|Par1|ThrR	3336	-0.813222	3.91937	-3.49787	0.00201367	0.0375476
chr17	35016579	35026741	+	ENSMUSG00000007030.8	protein_coding	Vwa7	27762	von Willebrand factor A domain containing 7	C6orf27|D17H6S56E-3|G7c|NG37	4313	-1.9095	-0.905874	-3.55049	0.00201415	0.0375476
chr11	94936224	94953042	+	ENSMUSG00000001506.10	protein_coding	Col1a1	12842	collagen, type I, alpha 1	Col1a-1|Cola-1|Cola1|Mov-13|Mov13	6563	-3.45405	-1.70375	-3.75391	0.00202142	0.0376195
chr13	73467197	73516422	+	ENSMUSG00000021608.15	protein_coding	Lpcat1	210992	lysophosphatidylcholine acyltransferase 1	2900035H07Rik|Aytl2|BB137372|BC005662|C87117|LPCAT|LPCAT-1|lysoPAFAT|mLPCAT1|rd11	4632	-0.64018	4.55173	-3.48005	0.00205581	0.0381952
chr6	48684549	48692060	+	ENSMUSG00000054435.16	protein_coding	Gimap4	107526	GTPase, IMAP family member 4	AU019574|E430007K16Rik|Ian-1|Ian1|Imap4	1837	-0.965287	2.59029	-3.4831	0.00206288	0.038217
chr5	43744615	43821638	-	ENSMUSG00000039753.16	protein_coding	Fbxl5	242960	F-box and leucine-rich repeat protein 5	Fbl4|Fir4	9740	-0.521745	6.1887	-3.47764	0.00206458	0.038217
chr8	105312265	105326278	-	ENSMUSG00000041679.9	protein_coding	Lrrc29	234684	leucine rich repeat containing 29	A630024J02Rik|FBL9|FBXL9	3958	1.02608	2.67162	3.48954	0.00206737	0.038217
chr7	45825223	45830944	-	ENSMUSG00000053801.18	protein_coding	Grwd1	101612	glutamate-rich WD repeat containing 1	A301|AI504353|Grwd|Wdr28	2057	-0.838865	3.38951	-3.47796	0.00207144	0.0382282
chr8	4493026	4531680	+	ENSMUSG00000008206.16	protein_coding	Cers4	67260	ceramide synthase 4	2900019C14Rik|Lass4|Trh1	12264	-1.77948	0.268494	-3.52427	0.00208442	0.0383946
chr7	25757273	25788705	-	ENSMUSG00000002602.16	protein_coding	Axl	26362	AXL receptor tyrosine kinase	AI323647|Ark|Tyro7|Ufo	5033	-0.867461	2.41927	-3.47449	0.00208742	0.0383946
chr11	115420128	115431274	+	ENSMUSG00000016940.18	protein_coding	Kctd2	70382	potassium channel tetramerisation domain containing 2	2310012I15Rik	3009	0.549794	7.20016	3.46221	0.00213083	0.0391278
chr10	7832470	7870396	+	ENSMUSG00000039981.6	protein_coding	Zc3h12d	237256	zinc finger CCCH type containing 12D	D730019B10Rik|TFL	4092	-1.01135	1.96328	-3.46612	0.00213738	0.0391829
chr10	81233155	81252123	+	ENSMUSG00000034949.18	protein_coding	Zfr2	103406	zinc finger RNA binding protein 2	2010013I23Rik|9130206N08Rik|AW045600|mKIAA1086	7483	-1.47237	0.502885	-3.48753	0.00214919	0.0392802
chr6	124864692	124888221	-	ENSMUSG00000023274.14	protein_coding	Cd4	12504	CD4 antigen	L3T4|Ly-4	4032	0.464205	11.27	3.45647	0.00214981	0.0392802
chr2	49787688	49948849	+	ENSMUSG00000026765.12	protein_coding	Lypd6b	71897	LY6/PLAUR domain containing 6B	2310010M24Rik|AW049525	2604	-0.692392	5.03789	-3.46065	0.00216149	0.0394284
chr2	10153571	10256529	+	ENSMUSG00000025780.7	protein_coding	Itih5	209378	inter-alpha (globulin) inhibitor H5	4631408O11Rik|5430408M01Rik|E130106B02	7900	-0.943449	2.61276	-3.45702	0.00216617	0.0394486
chr6	121210696	121226854	+	ENSMUSG00000030137.8	protein_coding	Tuba8	53857	tubulin, alpha 8	-	2263	1.16222	1.23187	3.45994	0.0021895	0.0398079
chr11	50811086	50827724	-	ENSMUSG00000044807.13	protein_coding	Zfp354c	30944	zinc finger protein 354C	5330421P20Rik|AJ18|AW743325|Kid3|Tcf17l2|Znf354c|mKIAA4218	5596	-0.567425	5.04024	-3.43986	0.0022194	0.0402851
chr17	34238903	34254414	+	ENSMUSG00000041538.16	protein_coding	H2-Ob	15002	histocompatibility 2, O region beta locus	A-beta-2|A-beta2|H-2Ab|H-2I|H-2Ob|H2-Ab|H2-Ab2|H2-IAb2|Ob|vic1	5380	-1.5777	1.02529	-3.4812	0.00224475	0.040664
chr5	24384181	24392143	-	ENSMUSG00000038295.14	protein_coding	Atg9b	213948	autophagy related 9B	Apg912|Apg9l2|Apgdc2|Gm574|Nos3as|eONE|sONE	3946	-2.0307	0.0798152	-3.51916	0.00224765	0.040664
chr1	193346346	193370298	-	ENSMUSG00000016179.11	protein_coding	Camk1g	215303	calcium/calmodulin-dependent protein kinase I gamma	CLICK-III|CaMKIgamma	2759	0.958175	3.70742	3.51706	0.00225695	0.0407655
chr2	30400471	30415813	-	ENSMUSG00000026853.15	protein_coding	Crat	12908	carnitine acetyltransferase	AW107812|CARAT	5388	-0.61573	4.3558	-3.42623	0.0022784	0.0410503
chr6	113514874	113531652	-	ENSMUSG00000030286.6	protein_coding	Emc3	66087	ER membrane protein complex subunit 3	0610039A15Rik|AI225901|AW260416|Pob|Tmem111	3361	0.523895	7.2076	3.42571	0.00228016	0.0410503
chr5	107331159	107387058	+	ENSMUSG00000029279.15	protein_coding	Brdt	114642	bromodomain, testis-specific	7420412D09Rik|Brd6|Fsrg3	5115	0.694033	5.64744	3.47654	0.00233346	0.0419415
chr2	145675215	145887616	+	ENSMUSG00000001768.16	protein_coding	Rin2	74030	Ras and Rab interactor 2	2010003K16Rik|4632403N06Rik|AW821980|RASSF4	11271	-1.95878	-0.801386	-3.47797	0.00233761	0.0419478
chr12	108825873	108835883	-	ENSMUSG00000021265.3	protein_coding	Slc25a29	214663	solute carrier family 25 (mitochondrial carrier, palmitoylcarnitine transporter), member 29	C030003J19Rik|CACL|mCACL	2606	0.66896	4.15851	3.40654	0.00236678	0.0423659
chr2	84432855	84476775	-	ENSMUSG00000027082.15	protein_coding	Tfpi	21788	tissue factor pathway inhibitor	A630013F22Rik|AW552122|EPI|LACI	5463	-1.75821	0.123134	-3.45753	0.00236859	0.0423659
chr17	43641891	43667214	-	ENSMUSG00000023912.10	protein_coding	Slc25a27	74011	solute carrier family 25, member 27	3632410G24Rik|9430092A03Rik|D530043E16Rik|Ucp4	3935	-0.832556	3.18991	-3.39965	0.00240644	0.0429733
chr11	89982665	90002894	-	ENSMUSG00000020553.8	protein_coding	Pctp	18559	phosphatidylcholine transfer protein	PC-TP|StarD2	2723	-1.39491	0.5622	-3.42143	0.00242065	0.0431571
chr7	25009849	25072346	-	ENSMUSG00000003378.9	protein_coding	Grik5	14809	glutamate receptor, ionotropic, kainate 5 (gamma 2)	GluK5|GluRgamma2|KA2	5168	-0.969957	2.1432	-3.39728	0.00243352	0.0433166
chr15	99125916	99213215	+	ENSMUSG00000051934.5	protein_coding	Spats2	72572	spermatogenesis associated, serine-rich 2	2700012F11Rik|59kDa|Scr59|p59	4120	0.615255	4.52759	3.38777	0.00245245	0.0435834
chr8	33782643	33929863	-	ENSMUSG00000031586.17	protein_coding	Rbpms	19663	RNA binding protein gene with multiple splicing	2010300K22Rik|2700019M19Rik|AU017537|RBP-MS|hermes	6556	2.10862	-1.21477	3.45855	0.00247809	0.0439474
chr9	21526176	21545333	+	ENSMUSG00000057191.13	protein_coding	AB124611	382062	cDNA sequence AB124611	Gm1706	1447	-0.759104	3.68648	-3.38269	0.0024809	0.0439474
chr13	56173704	56178885	-	ENSMUSG00000049625.6	protein_coding	Tifab	212937	TRAF-interacting protein with forkhead-associated domain, family member B	-	3497	-2.85895	-2.11859	-3.49811	0.00254277	0.0449712
chr2	34171457	34373142	-	ENSMUSG00000038718.15	protein_coding	Pbx3	18516	pre B cell leukemia homeobox 3	-	6109	1.3381	0.579642	3.3867	0.00257197	0.0454148
chr3	9250602	9285333	+	ENSMUSG00000069114.8	protein_coding	Zbtb10	229055	zinc finger and BTB domain containing 10	4832414A18|AU021107|RINZF	7414	-2.22547	-1.70511	-3.44258	0.00259692	0.0457822
chr11	70984091	71004437	-	ENSMUSG00000040620.15	protein_coding	Dhx33	216877	DEAH (Asp-Glu-Ala-His) box polypeptide 33	3110057P17Rik|9430096J02Rik|Ddx33	10031	-0.646966	4.13942	-3.35442	0.00261477	0.0459695
chr1	75479532	75485705	+	ENSMUSG00000051703.14	protein_coding	Tmem198	319998	transmembrane protein 198	A230078I05Rik|Tmem198-1|Tmem198a	2504	-1.89761	-1.38053	-3.41656	0.00261588	0.0459695
chr1	189880492	189922363	-	ENSMUSG00000026603.13	protein_coding	Smyd2	226830	SET and MYND domain containing 2	1110020E07Rik|4930402C15|KMT3C|Zmynd14	2717	-1.30199	0.707547	-3.36884	0.00265141	0.0465198
chr11	50832031	50841552	-	ENSMUSG00000044296.10	protein_coding	Zfp879	214779	zinc finger protein 879	Znf879	2414	-1.65188	-0.666656	-3.39114	0.00265744	0.0465517
chr6	52189671	52191753	-	ENSMUSG00000000942.10	protein_coding	Hoxa4	15401	homeobox A4	AV206827|Hox-1.4	1594	-2.0044	-1.21907	-3.38379	0.00283186	0.0494552
chr3	132881745	132950291	-	ENSMUSG00000040998.18	protein_coding	Npnt	114249	nephronectin	1110009H02Rik|AA682063|AI314031|Nctn|POEM	5026	-2.61369	-2.10424	-3.42304	0.00283216	0.0494552
chr9	96682770	96752831	-	ENSMUSG00000040433.16	protein_coding	Zbtb38	245007	zinc finger and BTB domain containing 38	A930014K01Rik|CIBZ	11733	-0.685396	4.1157	-3.31159	0.00283967	0.049508
chr17	33996017	34000347	-	ENSMUSG00000061232.16	protein_coding	H2-K1	14972	histocompatibility 2, K1, K region	H-2K|H-2K(d)|H2-D1|H2-K|K-f	2938	-0.607461	4.81576	-3.30979	0.00284759	0.0495678
chr4	117128655	117133963	-	ENSMUSG00000028680.14	protein_coding	Plk3	12795	polo like kinase 3	Cnk|Fnk|PLK-3|PRK	2531	-1.02213	1.77631	-3.31546	0.00285956	0.0496978
