# Supplementary material for: Suv39h-catalyzed H3K9me3 is critical for euchromatic genome organization and the maintenance of gene transcription
Source: HighWire-hosted journal article supplement (doi:10.1101/gr.279119.124), 2024-05-06
Supplement: Supplemental_Table_5.xlsx [file Supplemental_Table_5.xlsx]

## Sheet: README
Supplementary Table 5: Differential TAD boundaries between Suv39h1 and Suv39h2 double knockout (DKO) and control cells (CON)
All differential TAD boundaries between DKO and CON with false discovery rate <0.05. Included genomic coordinates of boundary, P-value and direction of strength change

## Sheet: Differential TAD boundaries
seqnames	start	end	DKO contrast score	Con contrast score	logFC	logCPM	F	PValue	FDR	Strengthened in DKO
chr7	129599930	129800020	0.159604	1.83614	-1.67654	3.52406	666.562	1.10742e-36	1.30045e-32	FALSE
chr14	15799862	16000061	0.400191	-0.671257	1.07145	4.23051	456.993	9.47717e-32	5.51805e-28	FALSE
chr15	93400211	93600429	0.254767	1.4011	-1.14633	4.12814	450.867	1.4097e-31	5.51805e-28	FALSE
chr18	4000214	4200374	0.401658	-0.693892	1.09555	3.97855	423.769	8.65539e-31	2.54101e-27	FALSE
chr10	85199910	85399503	-0.240234	0.74033	-0.980564	4.16493	393.131	7.63361e-30	1.55577e-26	FALSE
chr5	99200368	99399974	0.49646	1.91816	-1.4217	3.45929	411.191	7.9491e-30	1.55577e-26	FALSE
chr14	16000058	16200185	-1.16173	-2.38465	1.22291	4.00967	389.934	9.66058e-30	1.62063e-26	FALSE
chr3	50814428	51000810	-0.644165	-1.89816	1.254	3.76327	384.976	1.39642e-29	2.04977e-26	FALSE
chr10	81599671	81799960	-3.10257	-1.3189	-1.78367	2.77386	334.699	7.49779e-28	9.78295e-25	TRUE
chr15	86600118	86800033	-0.154653	0.834456	-0.989109	3.76216	302.444	1.2681e-26	1.48913e-23	FALSE
chr12	18000106	18200031	-1.05071	0.469827	-1.52054	2.24422	300.383	1.53186e-26	1.63533e-23	TRUE
chr5	142200061	142400025	0.6028	-0.298943	0.901744	4.03594	287.129	5.30225e-26	5.18869e-23	TRUE
chr3	51200058	51400107	1.85671	0.767789	1.08892	3.69623	285.227	6.36037e-26	5.74537e-23	TRUE
chr5	20600017	20800579	0.606318	-0.335463	0.941781	3.78809	277	1.41371e-25	1.1858e-22	TRUE
chr15	41799951	42000114	-0.247158	0.8733	-1.12046	3.23739	273.945	1.91114e-25	1.49617e-22	FALSE
chr12	89599981	89799687	0.0587466	1.14208	-1.08333	3.10086	263.674	5.37401e-25	3.94419e-22	FALSE
chr18	3400230	3600251	0.645867	1.73647	-1.0906	3.37002	244.266	4.15238e-24	2.86832e-21	FALSE
chr17	16799777	17000056	1.16562	0.0443191	1.1213	2.9183	243.631	4.44904e-24	2.90251e-21	TRUE
chr3	21599957	21800069	1.01119	0.27297	0.738217	4.35718	240.847	6.03171e-24	3.61683e-21	TRUE
chr18	88999614	89199618	0.0961222	1.1455	-1.04938	3.17122	240.655	6.15998e-24	3.61683e-21	FALSE
chr4	62800074	62999996	-0.268717	0.518813	-0.78753	4.06159	238.916	7.46195e-24	4.17265e-21	FALSE
chr13	15999929	16199571	0.20896	1.28517	-1.07621	3.07377	232.888	1.46243e-23	7.80603e-21	FALSE
chr4	104999906	105200051	0.23624	1.2476	-1.01136	3.2867	232.384	1.54798e-23	7.88314e-21	FALSE
chr4	63199978	63400162	0.693118	0.0184685	0.67465	4.7119	232.03	1.61113e-23	7.88314e-21	TRUE
chr5	20400241	20600020	0.834012	-0.118326	0.952339	3.5462	228.647	2.36716e-23	1.1119e-20	TRUE
chr1	75399903	75600100	-1.65619	-2.65988	1.0037	3.87562	228.021	2.54305e-23	1.14858e-20	FALSE
chr10	84400769	84600017	1.09061	0.218166	0.872444	4.04891	244.98	2.70244e-23	1.17536e-20	TRUE
chr2	159000064	159199919	0.218922	1.19641	-0.97749	3.13034	221.99	5.11309e-23	2.09821e-20	FALSE
chr3	51000807	51200061	-0.513352	-1.54103	1.02768	3.23604	221.687	5.29771e-23	2.09821e-20	FALSE
chr15	42599913	42799846	-0.644091	-1.68729	1.04319	3.28557	221.587	5.36032e-23	2.09821e-20	FALSE
chr15	49600209	49799975	-0.16915	0.923381	-1.09253	3.02673	220.41	6.15438e-23	2.33132e-20	FALSE
chr5	103600180	103799921	1.96388	1.03598	0.9279	3.76491	219.906	6.53109e-23	2.3967e-20	TRUE
chr8	35999937	36200191	-0.416069	-1.18729	0.771223	4.20788	212.459	1.5894e-22	5.65586e-20	FALSE
chr13	28199998	28399852	1.8081	1.04098	0.767113	4.30426	208.97	2.43099e-22	8.39621e-20	TRUE
chr5	19799935	20000102	-0.127165	0.894535	-1.0217	3.01779	207.701	2.84117e-22	9.43856e-20	FALSE
chr5	125600222	125799992	0.212717	1.24394	-1.03122	2.92363	207.552	2.89354e-22	9.43856e-20	FALSE
chr5	125200041	125400575	-1.14287	-1.89577	0.752908	4.40154	206.057	3.48046e-22	1.10462e-19	FALSE
chr1	188999719	189200817	0.582762	1.50359	-0.920831	3.49907	203.137	5.00746e-22	1.54744e-19	FALSE
chr15	63600054	63799782	-0.687938	-1.57278	0.884845	3.67954	201.067	6.49581e-22	1.9559e-19	FALSE
chr1	81200580	81399717	-0.0885874	-1.1338	1.04522	2.9658	200.449	7.02316e-22	2.06182e-19	FALSE
chr9	69999236	70200491	0.988781	0.313453	0.675328	4.28453	196.951	1.09626e-21	3.13986e-19	TRUE
chr5	20000099	20200202	-0.00533555	0.957068	-0.962403	3.10886	194.973	1.41398e-21	3.95342e-19	FALSE
chr2	50199846	50399599	-0.91682	-0.086459	-0.830361	3.80805	193.416	1.73e-21	4.72451e-19	TRUE
chr14	14999667	15200157	0.165806	0.97044	-0.804634	3.80429	190.432	2.55501e-21	6.67332e-19	FALSE
chr5	128999786	129199865	0.863407	1.72025	-0.856841	3.7172	190.425	2.55726e-21	6.67332e-19	FALSE
chr1	121400540	121599986	0.352653	-0.540173	0.892826	3.43874	190.603	3.33985e-21	8.52606e-19	FALSE
chr6	112399998	112600067	0.851355	1.77793	-0.926571	3.47028	185.336	5.02592e-21	1.2407e-18	FALSE
chr13	56599871	56799885	-0.677445	-1.53234	0.854894	3.57378	185.118	5.1748e-21	1.2407e-18	FALSE
chr13	17400092	17599533	-0.343793	-1.35562	1.01183	3.00856	186.57	5.17707e-21	1.2407e-18	FALSE
chr13	17599530	17799496	1.08543	0.0693454	1.01608	2.8082	184.176	5.87332e-21	1.37941e-18	TRUE
chr18	73200029	73400214	1.14575	0.302117	0.843636	3.50156	181.389	8.5677e-21	1.97275e-18	TRUE
chr9	109599973	109800004	0.0500643	-0.86204	0.912104	2.97876	179.201	1.15587e-20	2.61026e-18	FALSE
chr8	107600115	107800565	-0.0608929	0.893184	-0.954077	2.86243	178.667	1.24402e-20	2.75633e-18	FALSE
chr19	39999851	40200084	0.640083	-0.299472	0.939556	2.8654	177.326	1.49723e-20	3.25591e-18	TRUE
chr15	50600266	50800073	1.73483	0.781766	0.953065	3.29133	176.932	1.58136e-20	3.37634e-18	TRUE
chr3	50200298	50399881	0.570402	1.43757	-0.867164	3.70727	174.31	2.27952e-20	4.78008e-18	FALSE
chr8	112200237	112399442	0.0863266	1.04979	-0.963462	2.83691	173.871	2.42468e-20	4.99527e-18	FALSE
chr3	59200023	59399517	-0.569024	0.196511	-0.765534	3.66992	171.991	3.16106e-20	6.40006e-18	TRUE
chr3	144000068	144200114	-0.0263797	-0.756246	0.729866	3.81378	170.851	3.7163e-20	7.39669e-18	FALSE
chr7	78199479	78399983	0.70038	-0.0633853	0.763765	3.65226	170.051	4.16511e-20	8.15181e-18	TRUE
chr17	53400023	53599052	0.709071	-0.162565	0.871635	3.21359	168.427	5.25629e-20	1.01188e-17	TRUE
chr17	9199966	9399962	0.096218	0.987009	-0.890791	3.01249	168.054	5.5458e-20	1.05039e-17	FALSE
chr1	157399716	157600014	0.277989	-0.678669	0.956658	2.74356	167.875	5.69114e-20	1.05764e-17	FALSE
chr10	38999982	39200482	2.50103	1.73565	0.765375	4.26733	167.786	5.7642e-20	1.05764e-17	TRUE
chr15	94199909	94400360	-0.444085	-1.23302	0.788933	3.7097	166.804	6.64306e-20	1.20015e-17	FALSE
chr4	139801144	140000052	0.0935159	-0.656733	0.750248	3.76758	166.02	7.44283e-20	1.32426e-17	FALSE
chr18	85000168	85200033	-0.14832	0.731714	-0.880034	3.00487	164.591	9.16639e-20	1.60658e-17	FALSE
chr12	89399965	89599984	-0.038598	0.850759	-0.889357	2.99279	164.481	9.31582e-20	1.60876e-17	FALSE
chr16	8000070	8199713	0.0362491	-0.784623	0.820872	3.13297	162.332	1.27732e-19	2.17386e-17	FALSE
chr3	38599957	38799962	-1.09039	-1.86448	0.774089	3.87	161.992	1.3433e-19	2.25349e-17	FALSE
chr5	36400172	36599834	0.198327	-0.411334	0.609661	4.49001	165.3	1.48127e-19	2.44993e-17	FALSE
chr8	67399753	67599903	0.757709	1.66356	-0.905848	3.16645	160.597	1.65187e-19	2.66195e-17	FALSE
chr18	36800063	36999946	-0.204035	0.789846	-0.993881	2.57388	160.505	1.67464e-19	2.66195e-17	FALSE
chr11	102799861	103000037	0.722365	0.109942	0.612424	4.28074	160.494	1.67746e-19	2.66195e-17	TRUE
chr15	30399624	30600429	0.129817	1.03904	-0.909225	2.91592	159.525	1.93839e-19	3.035e-17	FALSE
chr2	48000020	48199919	0.358387	1.26692	-0.908534	2.97978	158.784	2.16556e-19	3.34607e-17	FALSE
chr11	34799664	34999996	-0.0462911	0.587353	-0.633644	4.08455	158.366	2.30586e-19	3.51659e-17	FALSE
chr6	70399977	70599887	0.436254	-0.576344	1.0126	2.48621	157.26	2.72403e-19	4.10106e-17	FALSE
chr11	53199279	53400128	0.465682	-0.186457	0.652139	3.98913	156.93	2.86301e-19	4.25574e-17	TRUE
chr15	10400053	10600328	0.755294	-0.0546351	0.80993	3.37199	156.754	2.94059e-19	4.31642e-17	TRUE
chr14	77999941	78199914	0.119487	-0.59976	0.719247	3.8153	156.479	3.06549e-19	4.4442e-17	FALSE
chr4	62599998	62800077	-0.372655	0.217198	-0.589852	4.34163	155.305	3.66378e-19	5.2468e-17	TRUE
chr6	89399636	89601070	-0.856145	-1.60867	0.752528	3.75837	153.918	4.52907e-19	6.40781e-17	FALSE
chr1	187399684	187600045	-0.827262	-0.0546458	-0.772617	3.52261	153.428	4.88281e-19	6.82605e-17	TRUE
chr10	37200081	37399968	0.306112	1.02768	-0.721571	3.80561	152.723	5.44258e-19	7.51909e-17	FALSE
chr5	35000303	35200059	-1.11771	-0.504212	-0.613495	4.32007	152.413	5.70856e-19	7.79484e-17	TRUE
chr11	35600273	35800273	-0.122663	-0.864007	0.741344	3.6089	151.581	6.49283e-19	8.76383e-17	FALSE
chr1	81000107	81200583	-0.160208	-1.02283	0.862622	3.02618	150.973	7.13529e-19	9.52156e-17	FALSE
chr13	15800553	15999932	-0.0244107	0.847265	-0.871676	2.90901	149.385	9.14025e-19	1.206e-16	FALSE
chr13	106399989	106600007	0.302204	-0.619827	0.922031	2.70399	148.487	1.05221e-18	1.3729e-16	FALSE
chr16	10199884	10400025	0.847312	1.61032	-0.763006	3.60592	147.934	1.14789e-18	1.48128e-16	FALSE
chr12	38599946	38800109	0.0566588	0.97779	-0.921131	2.80418	147.498	1.22956e-18	1.56943e-16	FALSE
chr8	90600411	90799829	0.0783866	-0.664308	0.742695	3.54299	147.321	1.26451e-18	1.59668e-16	FALSE
chr12	98199997	98399912	0.711858	1.63199	-0.920132	2.90788	147.206	1.28771e-18	1.60868e-16	FALSE
chr3	50399878	50599868	0.297977	1.06298	-0.765008	3.71748	146.577	1.42255e-18	1.75842e-16	FALSE
chr1	80800278	81000110	-1.26335	-0.458009	-0.805345	3.38882	146.162	1.51949e-18	1.85868e-16	TRUE
chr4	141999943	142199712	0.181457	-0.534239	0.715696	3.59302	145.94	1.57407e-18	1.9056e-16	FALSE
chr10	25200656	25399621	0.824213	0.178104	0.64611	3.93956	145.724	1.62918e-18	1.95219e-16	TRUE
chr13	10199983	10399987	-0.715313	-1.53365	0.818341	3.31217	145.435	1.70582e-18	2.02338e-16	FALSE
chr5	99799574	99999888	0.777811	0.0704408	0.707371	3.76463	144.635	1.93861e-18	2.2765e-16	TRUE
chr1	80600105	80800281	-1.21525	-0.477517	-0.737736	3.61595	144.327	2.03663e-18	2.36794e-16	TRUE
chr9	110800036	110999855	-1.17183	-1.86291	0.691085	4.21609	148.066	2.39361e-18	2.7557e-16	FALSE
chr11	45599625	45800248	0.814346	0.0843276	0.730018	3.5169	142.477	2.74299e-18	3.12728e-16	TRUE
chr13	48200010	48400124	-0.607099	-1.4575	0.850404	2.99104	141.799	3.06167e-18	3.45704e-16	FALSE
chr14	8400061	8599842	0.0219494	0.832229	-0.810279	3.15987	141.277	3.33249e-18	3.727e-16	FALSE
chr12	108999946	109200138	-0.784628	-0.171406	-0.613221	4.08588	140.471	3.80037e-18	4.21016e-16	TRUE
chr15	61400512	61600005	0.109746	0.871534	-0.761788	3.42149	139.617	4.3702e-18	4.79619e-16	FALSE
chr8	34199852	34400123	1.09864	1.64837	-0.549737	4.69293	139.531	4.43223e-18	4.81923e-16	FALSE
chr10	3800054	3999852	1.07898	0.341629	0.737352	3.6111	139.15	4.71824e-18	5.08315e-16	TRUE
chr7	123600653	123799981	0.322167	1.25133	-0.92916	2.65034	138.852	4.95529e-18	5.29e-16	FALSE
chr17	53200023	53400026	-0.346919	-1.15288	0.805966	3.14676	138.697	5.08357e-18	5.37805e-16	FALSE
chr14	18799896	19000094	-1.15842	-2.05268	0.894257	3.2152	138.114	5.59717e-18	5.86854e-16	FALSE
chr19	38999773	39199988	-0.396958	0.480966	-0.877925	2.70691	137.972	5.73006e-18	5.9547e-16	FALSE
chr1	73799996	73999821	1.12766	1.95433	-0.82667	3.57572	140.332	6.78531e-18	6.98946e-16	FALSE
chr10	105599941	105799508	-0.204711	-1.13718	0.932468	2.62572	135.803	8.21682e-18	8.39044e-16	FALSE
chr4	150800663	150999967	-1.23416	-1.87682	0.642661	4.11708	135.632	8.45436e-18	8.55858e-16	FALSE
chr18	25399873	25600078	-0.594607	-1.35281	0.758201	3.36366	135.267	8.98804e-18	8.96942e-16	FALSE
chr5	133800056	134000196	-0.366748	-1.20824	0.841494	2.88796	135.25	9.01296e-18	8.96942e-16	FALSE
chr12	13400011	13599847	-0.534314	-1.33305	0.798733	3.05219	134.762	9.7816e-18	9.64752e-16	FALSE
chr15	50199823	50399843	0.307177	-0.52029	0.827468	3.22309	134.716	9.85866e-18	9.64752e-16	FALSE
chr14	36599990	36799951	0.380991	-0.426788	0.807779	2.99223	133.619	1.18584e-17	1.15085e-15	FALSE
chr9	110599791	110800039	-0.799698	-0.247579	-0.552118	4.58496	136.512	1.25513e-17	1.20812e-15	TRUE
chr15	53599401	53799971	-0.574581	-1.39831	0.823732	3.02362	133.21	1.2708e-17	1.21325e-15	FALSE
chr17	62000063	62200241	-0.135512	0.796535	-0.932047	2.70974	135.972	1.29437e-17	1.22579e-15	FALSE
chr3	8599776	8800585	0.896368	1.71672	-0.820355	3.21401	130.939	1.87079e-17	1.7575e-15	FALSE
chr7	37398859	37600214	0.0279646	0.732859	-0.704894	3.47425	130.555	1.99794e-17	1.86204e-15	FALSE
chr6	83999953	84199985	0.230778	0.855159	-0.624381	3.93868	130.491	2.02013e-17	1.86791e-15	FALSE
chr2	28600217	28799411	1.36655	0.816425	0.55012	4.41393	129.756	2.29191e-17	2.09964e-15	TRUE
chr3	154799999	155000052	-0.307249	0.433823	-0.741072	3.1008	129.72	2.30651e-17	2.09964e-15	FALSE
chr7	107600075	107800016	-0.613753	-1.5699	0.956151	2.59578	129.215	2.51638e-17	2.27306e-15	FALSE
chr12	37399994	37600059	-0.0926578	-1.0096	0.916943	2.61628	128.451	2.87187e-17	2.5668e-15	FALSE
chr11	55600339	55799990	0.630276	1.42617	-0.795898	3.03409	128.424	2.88528e-17	2.5668e-15	FALSE
chr10	83799739	83999841	0.242861	0.92432	-0.681459	3.66992	127.816	3.20679e-17	2.83138e-15	FALSE
chr7	49800168	49999922	-0.8988	-1.68014	0.781336	3.27095	126.944	3.73381e-17	3.2721e-15	FALSE
chr1	6199993	6399614	0.0144698	0.820818	-0.806348	2.97854	126.508	4.02999e-17	3.50549e-15	FALSE
chr9	43199985	43400029	1.21527	0.680474	0.534794	4.4008	126.17	4.27583e-17	3.69199e-15	TRUE
chr13	48599972	48800130	1.39482	1.96603	-0.571211	4.44759	123.613	6.71703e-17	5.75753e-15	FALSE
chr9	30399892	30600048	0.441191	1.14268	-0.701487	3.48337	121.804	9.28179e-17	7.82702e-15	FALSE
chr8	84199748	84400337	-1.11288	-0.613126	-0.499752	4.73815	121.803	9.28399e-17	7.82702e-15	TRUE
chr18	33600349	33799765	-0.230995	-0.936127	0.705132	3.41348	121.774	9.33137e-17	7.82702e-15	FALSE
chr12	8799651	9000024	-0.750899	-1.43552	0.684617	3.59753	121.593	9.64026e-17	8.02876e-15	FALSE
chr5	118799986	119000707	-0.391985	0.214052	-0.606037	3.85007	121.463	9.86817e-17	8.1607e-15	TRUE
chr13	73400065	73600164	1.21325	1.80172	-0.588474	4.18606	121.37	1.00351e-16	8.24073e-15	FALSE
chrX	106000008	106200084	-1.52114	-0.611719	-0.90942	2.64658	121.283	1.0194e-16	8.31307e-15	TRUE
chr15	31200054	31400001	0.356293	-0.260421	0.616714	3.7702	121.127	1.04838e-16	8.49047e-15	TRUE
chr14	72199616	72399775	-0.0938751	-0.813143	0.719268	3.20852	121.045	1.06401e-16	8.55802e-15	FALSE
chr15	55800879	56000461	-0.460082	-1.21783	0.757749	3.08035	120.449	1.18495e-16	9.46594e-15	FALSE
chr13	107199360	107399773	0.465878	1.15657	-0.690695	3.47297	120.263	1.22542e-16	9.72301e-15	FALSE
chr3	154599853	154800002	0.105268	0.819971	-0.714703	3.10017	119.726	1.35095e-16	1.06471e-14	FALSE
chr10	91400035	91599875	-0.162118	0.539073	-0.701191	3.2518	119.271	1.46734e-16	1.14873e-14	FALSE
chr8	125399873	125600147	-1.26648	-0.777194	-0.489283	4.67771	118.49	1.69223e-16	1.31413e-14	TRUE
chr1	57399782	57600472	1.92224	2.64987	-0.727629	3.96593	118.461	1.70099e-16	1.31413e-14	FALSE
chr16	65400048	65600685	-0.249187	-1.12799	0.8788	2.59957	118.112	1.81317e-16	1.39164e-14	FALSE
chr2	160000223	160199791	0.933992	0.323102	0.61089	3.91126	117.946	1.86932e-16	1.42542e-14	TRUE
chr18	72999574	73200032	0.999939	0.303843	0.696096	3.33556	117.679	1.96312e-16	1.48559e-14	TRUE
chr7	6400582	6600792	-0.420623	0.334743	-0.755366	3.22989	121.561	1.97353e-16	1.48559e-14	TRUE
chr11	8399875	8599999	1.83843	2.55638	-0.717944	3.9819	116.869	2.27882e-16	1.70447e-14	FALSE
chr14	78199911	78399479	0.909709	0.313448	0.596261	3.96174	116.07	2.64159e-16	1.96331e-14	TRUE
chr12	26199959	26399948	-1.22294	-1.80098	0.578038	4.20137	115.757	2.79962e-16	2.06767e-14	FALSE
chr6	66400068	66600006	-0.494175	-1.17297	0.678793	3.60924	115.435	2.97188e-16	2.17847e-14	FALSE
chr10	83599584	83799742	-1.29507	-0.669711	-0.625361	3.80827	115.408	2.98674e-16	2.17847e-14	TRUE
chr5	103200005	103399725	0.423879	1.13978	-0.715905	3.27461	115.373	3.00627e-16	2.17918e-14	FALSE
chr3	100600322	100800693	-0.0621496	0.529025	-0.591175	3.85409	114.311	3.66483e-16	2.63611e-14	FALSE
chr10	68199855	68400319	-1.03065	-0.375382	-0.655271	3.54092	114.287	3.68153e-16	2.63611e-14	TRUE
chr10	45800044	46000227	-0.564167	-1.29716	0.732992	3.05389	113.693	4.1152e-16	2.92878e-14	FALSE
chr4	152399909	152600488	-1.32838	-1.97037	0.64199	3.94067	113.589	4.19597e-16	2.96053e-14	FALSE
chr8	128399679	128599702	-1.42128	-2.00676	0.585483	4.21959	113.571	4.21024e-16	2.96053e-14	FALSE
chr8	35599990	35800501	-1.0445	-0.531963	-0.512541	4.37075	112.958	4.72525e-16	3.30289e-14	TRUE
chr2	94599681	94800271	-0.162344	0.700117	-0.862462	2.448	112.644	5.01338e-16	3.48356e-14	FALSE
chr6	31800297	32000315	0.486844	1.19331	-0.706464	3.41031	112.319	5.60921e-16	3.87464e-14	FALSE
chr15	88400251	88599819	-0.352107	-1.04446	0.692355	3.32732	111.963	5.70346e-16	3.91671e-14	FALSE
chr7	48800025	48999871	0.813398	1.38974	-0.576339	4.01794	111.652	6.04971e-16	4.13034e-14	FALSE
chr14	30000000	30200410	1.26842	1.81952	-0.551104	4.33447	111.333	6.42827e-16	4.36342e-14	FALSE
chr13	17200372	17400095	-0.429558	-1.18892	0.759361	3.03706	111.285	6.48676e-16	4.37782e-14	FALSE
chr6	137600101	137799343	-0.633281	-1.32612	0.692838	3.33065	111.228	6.55773e-16	4.40042e-14	FALSE
chr2	170399954	170600079	-0.670568	-1.33345	0.662885	3.54619	110.971	6.88633e-16	4.59467e-14	FALSE
chr11	111000025	111200216	-0.435317	-1.13954	0.70422	3.25865	110.929	6.94228e-16	4.60583e-14	FALSE
chr6	107799709	108000111	0.0866672	-0.837773	0.92444	2.26591	110.59	7.40583e-16	4.88577e-14	FALSE
chr9	20199886	20399841	0.867513	0.0155551	0.851958	2.47836	110.058	8.19994e-16	5.37944e-14	TRUE
chr12	9199769	9399784	-0.0143708	0.697642	-0.712013	3.01552	109.693	8.7947e-16	5.73756e-14	FALSE
chr7	77999643	78199482	0.676213	0.0159699	0.660243	3.37241	109.429	9.25233e-16	6.00277e-14	TRUE
chr16	35800406	36000702	-0.0589153	-0.664549	0.605634	3.70981	108.506	1.10552e-15	7.13305e-14	FALSE
chr14	105799473	105999969	-1.28788	-2.08568	0.797796	3.10722	108.387	1.13128e-15	7.25934e-14	FALSE
chr17	26999993	27199281	-0.597809	-0.136827	-0.460982	4.67305	108.266	1.15807e-15	7.3909e-14	TRUE
chr17	17800654	18000024	-0.992229	-0.305519	-0.686709	3.14947	107.767	1.27553e-15	8.09653e-14	TRUE
chr4	6000030	6200127	-0.0498698	-0.877143	0.827273	2.68359	107.494	1.34527e-15	8.49326e-14	FALSE
chr11	74000206	74200072	0.0060542	-0.774144	0.780198	2.74723	107.198	1.4249e-15	8.94793e-14	FALSE
chr13	107599865	107799951	0.348864	-0.151823	0.500687	4.21623	106.929	1.50169e-15	9.35793e-14	TRUE
chr14	105199890	105400023	-0.159109	0.509388	-0.668497	3.25548	106.914	1.50613e-15	9.35793e-14	FALSE
chr14	105400020	105600356	0.418376	1.10884	-0.690464	3.38013	106.693	1.57238e-15	9.71815e-14	FALSE
chr12	88999956	89200278	-0.198572	-0.889091	0.690519	3.05185	104.874	2.24797e-15	1.38209e-13	FALSE
chr4	121399729	121599901	-0.663677	0.182221	-0.845898	2.38657	104.755	2.30136e-15	1.40755e-13	TRUE
chr2	172000085	172199843	-0.211263	-1.02333	0.812066	2.9066	111.126	2.79953e-15	1.70336e-13	FALSE
chr9	104399962	104599383	0.344516	0.986262	-0.641746	3.43996	103.196	3.13598e-15	1.89824e-13	FALSE
chr17	83000049	83199466	0.849001	1.55706	-0.708063	3.26554	102.695	3.46595e-15	2.08722e-13	FALSE
chr6	103200195	103400125	1.00425	1.80996	-0.80571	2.95331	102.667	3.64994e-15	2.1868e-13	FALSE
chr15	61799635	61999847	0.917122	0.393031	0.52409	4.09668	101.355	4.53627e-15	2.70403e-13	TRUE
chr5	36199472	36400175	-0.225937	-0.674735	0.448797	4.66061	101.103	4.77367e-15	2.83117e-13	FALSE
chr10	66600175	66800113	0.0842004	-0.752123	0.836324	2.4192	100.785	5.08995e-15	3.00358e-13	FALSE
chr10	85800000	85999689	0.78162	0.172146	0.609474	3.69461	100.614	5.26996e-15	3.09426e-13	TRUE
chr9	8000061	8199947	-0.577169	-1.26761	0.690437	3.12272	100.519	5.37194e-15	3.13844e-13	FALSE
chr13	46599929	46800265	-1.16453	-1.68529	0.520757	4.2556	100.154	5.78436e-15	3.36266e-13	FALSE
chr9	80200312	80400217	-0.132979	0.466495	-0.599475	3.53737	99.8744	6.12331e-15	3.54217e-13	FALSE
chr15	63399857	63600057	-1.06468	-1.71488	0.650199	3.75155	99.546	6.5468e-15	3.76858e-13	FALSE
chr6	112200142	112400001	0.0676356	0.757889	-0.690254	2.93119	99.2898	6.89823e-15	3.95151e-13	FALSE
chr14	54199619	54399920	1.42594	1.94276	-0.516822	4.39814	99.0591	7.23117e-15	4.12212e-13	FALSE
chr15	86800030	86999974	0.231385	0.816867	-0.585482	3.74693	98.8578	7.53528e-15	4.27472e-13	FALSE
chr16	42200064	42400447	0.253005	0.951631	-0.698625	3.05051	99.262	7.62803e-15	4.30654e-13	FALSE
chr7	120399893	120599841	0.251007	-0.430912	0.681919	2.92712	98.6844	7.80765e-15	4.38686e-13	FALSE
chr7	139000051	139199949	0.558251	1.13814	-0.579892	3.75465	98.4587	8.1775e-15	4.55591e-13	FALSE
chr11	117600070	117800047	0.463879	0.0358144	0.428065	4.77509	98.4536	8.18612e-15	4.55591e-13	TRUE
chr14	77599332	77799960	-0.214365	0.30174	-0.516105	4.0633	98.4178	8.24646e-15	4.56784e-13	FALSE
chr3	38400001	38599960	-1.73866	-1.23596	-0.502702	4.46813	97.6929	9.57294e-15	5.2777e-13	TRUE
chr1	12799858	12999882	0.237117	0.939015	-0.701898	2.90684	97.6541	9.64988e-15	5.29526e-13	FALSE
chr1	88599993	88799227	-2.17748	-1.61779	-0.55969	4.21113	97.3269	1.03241e-14	5.61355e-13	TRUE
chr13	73000373	73199938	-0.298776	-0.947161	0.648384	3.09149	97.3263	1.03255e-14	5.61355e-13	FALSE
chr2	23999942	24199975	0.25556	-0.516945	0.772505	2.56894	97.2838	1.04165e-14	5.6369e-13	FALSE
chr4	120599560	120800036	-2.80904e-05	-0.529756	0.529728	3.94886	97.0147	1.1013e-14	5.93235e-13	FALSE
chr3	10198820	10400034	-1.86377	-2.53265	0.668883	3.87712	95.8624	1.39926e-14	7.50295e-13	FALSE
chr18	6799870	7000470	0.397483	1.08567	-0.688188	2.9995	95.8066	1.41564e-14	7.5563e-13	FALSE
chr8	118999498	119199859	-0.66452	-1.34624	0.681716	3.14048	95.7753	1.42492e-14	7.5714e-13	FALSE
chr3	81600045	81800214	-0.21305	-0.893313	0.680263	3.08616	95.6441	1.46449e-14	7.7466e-13	FALSE
chr8	84599911	84799482	0.379984	-0.0745176	0.454502	4.38309	95.5725	1.48656e-14	7.8281e-13	TRUE
chr3	148199854	148399862	0.411826	1.18817	-0.776343	2.95238	101.666	1.56517e-14	8.20525e-13	FALSE
chr2	48800399	49000040	1.46418	0.79879	0.665386	3.68666	101.522	1.60792e-14	8.3919e-13	TRUE
chr8	115599904	115800033	-1.98247	-1.45805	-0.524421	4.32266	94.8856	1.71649e-14	8.91892e-13	TRUE
chr8	110399951	110599809	-0.26259	-0.897302	0.634712	3.30843	94.3201	1.93315e-14	1.00004e-12	FALSE
chr12	20999318	21200085	1.47311	2.20837	-0.735262	3.23165	94.2587	1.95831e-14	1.00862e-12	FALSE
chr19	52600010	52800752	-0.296808	-1.01512	0.718308	2.81072	93.933	2.09754e-14	1.07561e-12	FALSE
chr17	86399355	86600165	1.51096	1.04084	0.470116	4.73833	95.4259	2.21857e-14	1.13273e-12	TRUE
chr4	21399946	21600027	0.700421	-0.102386	0.802807	2.45759	93.3622	2.36659e-14	1.20307e-12	TRUE
chr5	117200322	117400026	-0.211658	0.301317	-0.512974	3.91854	93.2	2.44937e-14	1.23978e-12	FALSE
chr1	40999861	41199996	0.0425736	0.824757	-0.782183	2.64526	93.8016	2.48404e-14	1.25193e-12	FALSE
chr5	20800576	20999928	0.999144	0.418019	0.581124	3.66562	92.9046	2.60788e-14	1.30668e-12	TRUE
chr8	33999199	34199855	1.0995	1.61823	-0.518735	4.22577	92.8919	2.61492e-14	1.30668e-12	FALSE
chr13	107000129	107199363	-0.587258	-0.0257849	-0.561473	3.70163	92.854	2.63608e-14	1.31167e-12	TRUE
chr5	37400111	37599727	0.239419	0.897943	-0.658523	2.97896	92.7478	2.69629e-14	1.33597e-12	FALSE
chr4	120800033	121000098	-0.0622598	-0.597846	0.535586	3.79359	92.6757	2.73793e-14	1.34534e-12	FALSE
chr2	162400508	162600001	-0.435512	-1.0828	0.647287	3.08408	92.6754	2.73811e-14	1.34534e-12	FALSE
chr12	32199785	32400214	-0.876554	-0.390404	-0.48615	4.22234	92.6152	2.77342e-14	1.35701e-12	TRUE
chr10	82399925	82600052	1.1967	0.541964	0.654735	3.08105	92.2657	2.98789e-14	1.45589e-12	TRUE
chr8	91000209	91199942	-0.409604	0.131457	-0.541061	3.85646	92.0475	3.13031e-14	1.51898e-12	TRUE
chr6	66200819	66400071	-0.659166	-1.28985	0.63068	3.45357	91.9333	3.20767e-14	1.55011e-12	FALSE
chr8	86400029	86600244	0.0397867	-0.485382	0.525169	3.84102	91.5919	3.45082e-14	1.66078e-12	FALSE
chr7	130200154	130399467	-0.143026	-0.751455	0.608429	3.44701	91.0893	3.84378e-14	1.84235e-12	FALSE
chr4	4800014	5000251	-0.407279	0.245186	-0.652466	2.97027	90.6369	4.23692e-14	2.02253e-12	TRUE
chr15	86000201	86200008	-0.738348	-1.15582	0.417471	4.74344	90.4971	4.36661e-14	2.076e-12	FALSE
chr5	117800374	118000270	0.315726	-0.167925	0.48365	4.06348	90.2562	4.59976e-14	2.1727e-12	TRUE
chr1	79400006	79599756	0.341493	-0.276114	0.617607	3.1195	90.2489	4.60702e-14	2.1727e-12	TRUE
chr15	3199882	3400035	1.31329	2.16429	-0.850997	2.66484	89.8115	5.06442e-14	2.37886e-12	FALSE
chr15	31799970	32000015	-0.160494	0.449155	-0.60965	3.2964	89.6465	5.24887e-14	2.45568e-12	FALSE
chr4	128200106	128400742	-0.723261	-1.33989	0.616625	3.38882	89.2741	5.69112e-14	2.65202e-12	FALSE
chr15	85799688	86000204	0.784903	0.384252	0.400651	4.80455	89.1268	5.87655e-14	2.7276e-12	TRUE
chr13	74800212	75000498	-0.606782	0.0132836	-0.620065	3.2195	88.8962	6.17927e-14	2.85682e-12	TRUE
chr9	70400484	70599979	-0.34495	0.137203	-0.482153	4.08039	88.6066	6.58234e-14	3.03123e-12	TRUE
chr12	89200275	89399968	-0.0648413	-0.731316	0.666475	2.91296	88.529	6.69487e-14	3.07101e-12	FALSE
chr12	36600639	36799950	-0.101624	0.539481	-0.641105	3.21029	88.4695	6.78251e-14	3.0991e-12	FALSE
chr4	113999895	114199945	0.102438	-0.682746	0.785184	2.44955	88.382	6.91355e-14	3.14674e-12	FALSE
chr13	25199735	25399930	0.488999	1.26858	-0.779579	2.52809	88.1881	7.21323e-14	3.27046e-12	FALSE
chr4	54000371	54199520	0.0983186	0.7582	-0.659881	2.92402	88.0257	7.47464e-14	3.37595e-12	FALSE
chr15	97600259	97799846	1.45797	0.999105	0.458863	4.40916	88.0076	7.50427e-14	3.37635e-12	TRUE
chr5	130400107	130600178	0.55919	1.22534	-0.666152	2.9573	87.9082	7.66975e-14	3.43763e-12	FALSE
chr16	19000065	19200003	-0.0304591	0.734884	-0.765343	2.43364	87.8658	7.74152e-14	3.4566e-12	FALSE
chr8	117399329	117599622	-1.85858	-2.38741	0.528822	4.41328	87.7912	7.86921e-14	3.50031e-12	FALSE
chr4	84999952	85200040	-0.451805	-1.1509	0.699095	2.86592	87.7173	7.99799e-14	3.54417e-12	FALSE
chr9	36400507	36600391	0.0691296	-0.751473	0.820603	2.28641	87.6863	8.05272e-14	3.555e-12	FALSE
chr6	65799630	66000101	0.305462	0.90128	-0.595819	3.61646	87.668	8.08512e-14	3.55594e-12	FALSE
chr4	152600485	152799852	0.366504	0.956449	-0.589945	3.4695	87.4759	8.43411e-14	3.69559e-12	FALSE
chr15	49400511	49600212	0.238779	0.984797	-0.746017	2.75104	87.3831	8.60816e-14	3.75783e-12	FALSE
chr2	36400096	36600004	0.461764	1.28355	-0.821784	2.3082	87.2582	8.84826e-14	3.84834e-12	FALSE
chr17	57400070	57599969	-0.301968	0.450492	-0.75246	2.52706	87.1602	9.04149e-14	3.91787e-12	FALSE
chr4	139599998	139801147	-0.998212	-0.523854	-0.474358	4.32468	87.4931	9.57275e-14	4.13283e-12	TRUE
chr15	28399690	28600674	-0.280448	0.394175	-0.674623	2.84609	86.6246	1.01769e-13	4.36259e-12	FALSE
chr12	37200021	37399997	0.0164204	-0.707752	0.724172	2.72578	86.6171	1.01937e-13	4.36259e-12	FALSE
chr15	30999954	31200057	0.775499	0.190253	0.585246	3.40985	86.6049	1.02214e-13	4.36259e-12	TRUE
chr15	94400357	94599621	-0.360979	-0.984227	0.623248	3.18668	86.5907	1.02536e-13	4.36259e-12	FALSE
chr3	21800066	22000369	0.129828	-0.300173	0.43	4.38528	86.4538	1.05691e-13	4.48063e-12	FALSE
chr9	12999904	13200106	0.334225	-0.370383	0.704608	2.70228	86.2928	1.0953e-13	4.62667e-12	FALSE
chr9	50399906	50599844	0.808511	0.31012	0.498391	3.94572	85.6035	1.27668e-13	5.3735e-12	TRUE
chr6	55200288	55399984	-0.579055	-1.12954	0.550486	3.65757	85.3637	1.34678e-13	5.6483e-12	FALSE
chr17	15800571	15999971	-0.548195	0.053371	-0.601566	3.24409	85.2611	1.378e-13	5.75866e-12	TRUE
chr14	15200154	15399650	0.470064	0.964089	-0.494025	4.19558	85.1877	1.40076e-13	5.83302e-12	FALSE
chr11	52999601	53199282	0.110109	-0.360401	0.470509	4.08645	85.0819	1.43427e-13	5.95144e-12	FALSE
chr5	113599943	113800698	0.630654	0.186558	0.444096	4.234	85.0495	1.44471e-13	5.97367e-12	TRUE
chr14	36799948	36999930	0.780358	0.10662	0.673737	2.8033	84.9667	1.47171e-13	6.06396e-12	TRUE
chr18	53800004	54000705	-0.658165	-0.058236	-0.599929	3.32837	84.8194	1.52104e-13	6.23619e-12	TRUE
chr2	94200199	94400456	-0.921949	-1.52999	0.608041	3.40396	84.8104	1.52413e-13	6.23619e-12	FALSE
chr2	36999932	37199911	-0.448568	-1.18081	0.732244	2.64683	84.6794	1.56951e-13	6.39955e-12	FALSE
chr7	108600196	108800210	0.100631	-0.702999	0.80363	2.20415	84.6529	1.57888e-13	6.41549e-12	FALSE
chr7	49999919	50200013	-0.241722	0.478755	-0.720477	2.55056	84.5	1.63397e-13	6.61644e-12	FALSE
chr1	6999649	7199820	0.0125802	-0.654801	0.667381	2.83015	84.435	1.65798e-13	6.69059e-12	FALSE
chr5	128599788	128799995	-0.309104	-0.916175	0.607071	3.33876	84.2793	1.71699e-13	6.90502e-12	FALSE
chr11	52400980	52599414	-0.0161618	0.482203	-0.498364	3.87354	84.1064	1.7851e-13	7.15442e-12	FALSE
chr8	22999698	23198588	-0.465095	-1.03435	0.569257	3.5119	84.0377	1.8129e-13	7.24111e-12	FALSE
chr2	36199677	36400099	-1.09706	-0.470363	-0.626699	3.05932	83.9201	1.86157e-13	7.40907e-12	TRUE
chr1	15000590	15200716	0.210677	0.89336	-0.682683	2.77592	83.9058	1.86757e-13	7.40907e-12	FALSE
chr4	103400306	103600114	-0.178048	0.428622	-0.606671	3.15993	83.7139	1.95014e-13	7.71062e-12	FALSE
chr3	26799864	26999916	0.512793	-0.19137	0.704163	2.67744	83.6395	1.98316e-13	7.81484e-12	TRUE
chr13	47399733	47600273	0.346893	0.971762	-0.624868	2.99905	83.5371	2.02956e-13	7.97095e-12	FALSE
chr14	58800067	58999674	0.0562309	-0.554265	0.610496	3.05138	83.4413	2.07398e-13	8.11826e-12	FALSE
chr4	102800082	103000107	1.38183	0.906873	0.474955	4.18131	83.3428	2.1207e-13	8.27084e-12	TRUE
chr7	42999917	43199844	0.628606	-0.190134	0.818741	2.10357	83.3296	2.12705e-13	8.27084e-12	TRUE
chr15	11800577	12000255	0.210655	-0.271562	0.482218	3.98956	83.1375	2.22157e-13	8.60986e-12	FALSE
chr11	50399999	50600347	-0.312712	0.168333	-0.481045	3.95326	82.8598	2.36592e-13	9.13916e-12	TRUE
chr9	110999852	111199748	-0.767687	-1.31783	0.550139	3.68086	82.6538	2.47922e-13	9.54539e-12	FALSE
chr5	75399788	75599411	1.18673	0.71645	0.470279	4.13503	82.5446	2.54158e-13	9.75353e-12	TRUE
chr15	61199976	61400515	0.282119	0.880228	-0.598109	3.37082	82.5145	2.559e-13	9.78837e-12	FALSE
chr12	37000623	37200024	-0.36656	-1.11137	0.74481	2.72136	82.4664	2.58716e-13	9.86398e-12	FALSE
chr8	35800498	35999940	-0.136264	0.292591	-0.428854	4.41784	82.3476	2.65808e-13	1.01016e-11	FALSE
chr14	16400017	16600014	-0.838844	-0.249437	-0.589407	3.12553	82.2975	2.6886e-13	1.01674e-11	TRUE
chr11	113800191	114000145	-0.258935	0.173483	-0.432418	4.33126	82.2908	2.69271e-13	1.01674e-11	TRUE
chr6	57399526	57600149	0.139989	-0.442234	0.582223	3.36139	82.2408	2.72357e-13	1.02509e-11	FALSE
chr12	89799684	89999629	-0.0857274	0.510431	-0.596159	3.12308	82.1553	2.77715e-13	1.04192e-11	FALSE
chr12	71200219	71399867	-0.121748	0.458502	-0.58025	3.2465	82.1393	2.78731e-13	1.0424e-11	FALSE
chr12	17599759	17799183	-1.26112	-1.82481	0.563686	3.80757	81.9189	2.93112e-13	1.0927e-11	FALSE
chr6	56799997	57000011	0.421085	0.995975	-0.57489	3.45271	81.8468	2.97976e-13	1.10732e-11	FALSE
chr2	10999687	11200045	1.45404	0.93576	0.518279	4.18019	86.3694	3.18106e-13	1.1784e-11	TRUE
chr17	32399397	32600164	-0.798959	-0.381421	-0.417539	4.43392	81.5293	3.20424e-13	1.18325e-11	TRUE
chr2	71999855	72200204	1.17886	0.754239	0.424617	4.56621	81.423	3.28325e-13	1.20863e-11	TRUE
chr2	8599980	8800042	1.06483	1.75709	-0.692263	2.97862	81.3776	3.3176e-13	1.21745e-11	FALSE
chr15	42000111	42200289	0.330598	0.943108	-0.612511	3.29315	81.118	3.52117e-13	1.28813e-11	FALSE
chr6	109000103	109199994	-1.16292	-0.508452	-0.654465	2.96299	80.9659	3.64641e-13	1.32981e-11	TRUE
chr2	8800039	9000093	1.01712	1.60576	-0.588637	3.53147	80.8325	3.76004e-13	1.367e-11	FALSE
chr8	26800304	26999950	-0.801973	-1.29269	0.490721	4.00246	80.75	3.83214e-13	1.38891e-11	FALSE
chr4	153999623	154200178	-0.188325	0.352078	-0.540403	3.56119	80.6392	3.93122e-13	1.42044e-11	FALSE
chr1	90799918	90999886	0.842693	0.384622	0.458071	4.09281	80.5996	3.96725e-13	1.42906e-11	TRUE
chr14	17599931	17799721	0.41327	0.979498	-0.566228	3.55153	80.4058	4.14857e-13	1.48981e-11	FALSE
chr5	124999979	125200044	-0.264281	-0.674021	0.40974	4.4657	80.2551	4.29547e-13	1.53364e-11	FALSE
chr4	24199991	24399484	0.925287	0.241295	0.683992	2.70945	80.2538	4.29674e-13	1.53364e-11	TRUE
chrX	107000340	107200052	-0.102083	-0.851203	0.74912	2.63613	79.9022	4.66074e-13	1.65852e-11	FALSE
chr6	64999926	65199885	0.390937	1.12443	-0.73349	2.57242	79.7963	4.77653e-13	1.69459e-11	FALSE
chr11	110399958	110600078	-0.511852	0.0419967	-0.553848	3.47678	79.7491	4.82906e-13	1.70806e-11	TRUE
chr7	73600030	73800279	-0.762317	-0.2542	-0.508117	3.76212	79.6204	4.97545e-13	1.75456e-11	TRUE
chr7	58400187	58600404	1.50249	0.943721	0.558773	3.64173	79.5325	5.07791e-13	1.78532e-11	TRUE
chr7	137199514	137400169	0.278953	-0.264589	0.543542	3.46982	79.3931	5.24504e-13	1.83384e-11	TRUE
chr2	135799634	136000049	-0.144751	-0.75476	0.610009	3.05458	79.3914	5.24712e-13	1.83384e-11	FALSE
chr8	83399872	83600054	1.17524	0.677475	0.497767	3.96093	79.3587	5.28724e-13	1.84237e-11	TRUE
chr3	39000083	39199893	0.137772	0.777864	-0.640092	2.88982	79.3403	5.30988e-13	1.84479e-11	FALSE
chr1	88799224	89000208	0.146095	0.660586	-0.514491	3.70561	79.1237	5.5843e-13	1.93441e-11	FALSE
chr3	27399969	27599768	-0.59065	-0.108072	-0.482578	3.9344	78.9157	5.86157e-13	2.02448e-11	TRUE
chr1	73600408	73799999	-0.275336	-0.931884	0.656549	2.77648	78.8959	5.88874e-13	2.0279e-11	FALSE
chr15	62799913	63000222	-0.488133	-0.0463017	-0.441831	4.2151	78.8751	5.91741e-13	2.03182e-11	TRUE
chr18	88800068	88999617	0.577524	1.23292	-0.655391	2.97429	78.6374	6.25495e-13	2.14145e-11	FALSE
chr2	48199916	48400480	0.185875	0.812761	-0.626886	2.96593	78.6187	6.28238e-13	2.14459e-11	FALSE
chr4	63400159	63599964	0.0731676	-0.331809	0.404977	4.40982	78.4896	6.47483e-13	2.20388e-11	FALSE
chr8	87599923	87799663	-0.271738	0.267821	-0.539559	3.47574	78.2499	6.84848e-13	2.32433e-11	TRUE
chr10	85000817	85199913	-0.523592	-0.066501	-0.457091	4.03945	78.1982	6.93195e-13	2.34587e-11	TRUE
chr1	185599456	185800009	0.327581	0.947068	-0.619487	2.99708	78.1108	7.07546e-13	2.38738e-11	FALSE
chr13	58600146	58799704	-0.0783904	0.465492	-0.543882	3.45054	78.0989	7.09527e-13	2.38738e-11	FALSE
chr12	83399595	83600018	-0.0576772	-0.52631	0.468633	4.01137	77.9506	7.34657e-13	2.46488e-11	FALSE
chr1	78800128	79000617	-0.317445	0.273831	-0.591276	3.01719	77.8608	7.50317e-13	2.51025e-11	TRUE
chr2	145599922	145800220	0.113239	0.683201	-0.569962	3.48196	78.3337	7.52915e-13	2.51179e-11	FALSE
chr7	30999975	31200144	-1.93652	-2.59009	0.653565	3.62999	77.8309	7.55594e-13	2.51358e-11	FALSE
chr12	8199554	8399929	0.859875	1.3935	-0.533627	3.71233	77.5751	8.02458e-13	2.66194e-11	FALSE
chr9	109000054	109200080	-0.900537	-0.380782	-0.519755	3.66281	77.482	8.2024e-13	2.71326e-11	TRUE
chr5	104599773	104801022	0.921349	0.258837	0.662512	2.73974	77.4642	8.23682e-13	2.717e-11	TRUE
chr6	141999317	142200368	0.134982	-0.547634	0.682616	2.59655	77.4393	8.28534e-13	2.72534e-11	FALSE
chr11	90799721	91000016	-0.299694	0.393026	-0.69272	2.61565	77.3481	8.4653e-13	2.77676e-11	FALSE
chr4	151200043	151399837	0.420397	1.00866	-0.588258	3.26605	77.2087	8.74825e-13	2.86158e-11	FALSE
chr17	52400008	52600110	-2.25968	-1.76256	-0.497128	4.33813	77.1835	8.80037e-13	2.87063e-11	TRUE
chr9	7199845	7400118	0.219536	0.814964	-0.595428	3.09417	77.1698	8.829e-13	2.87199e-11	FALSE
chr8	61800029	62000340	-0.308074	-0.987943	0.679869	2.78644	77.1428	8.88542e-13	2.88236e-11	FALSE
chr11	115000019	115199777	1.57678	1.01361	0.563168	3.63619	77.0763	9.02596e-13	2.91794e-11	TRUE
chr3	99199975	99399996	-0.9302	-0.360648	-0.569552	3.25602	77.0675	9.0448e-13	2.91794e-11	TRUE
chr5	140999591	141199540	-1.06114	-0.592564	-0.468581	4.04654	77.0378	9.1084e-13	2.93041e-11	TRUE
chr8	114199845	114400302	-0.425412	-1.01871	0.593297	3.19207	76.9674	9.26126e-13	2.97145e-11	FALSE
chr10	25600033	25800456	0.181012	0.712767	-0.531754	3.51442	76.871	9.47485e-13	3.0236e-11	FALSE
chr18	58399946	58599329	0.619869	0.0355536	0.584315	3.31158	76.8708	9.47531e-13	3.0236e-11	TRUE
chr13	35600425	35800095	-0.260627	-0.704098	0.443471	4.12062	76.8249	9.57868e-13	3.04831e-11	FALSE
chr4	154200175	154400077	-0.290677	0.19044	-0.481117	3.81059	76.5179	1.03012e-12	3.26939e-11	TRUE
chr13	18000381	18199498	0.458566	1.08916	-0.630596	2.93759	76.4023	1.05877e-12	3.35125e-11	FALSE
chr8	95199937	95400396	-0.274824	-0.682946	0.408121	4.36458	76.3581	1.06994e-12	3.37751e-11	FALSE
chr5	41399744	41599976	0.182219	-0.430174	0.612393	2.91033	76.2464	1.09871e-12	3.45903e-11	FALSE
chr11	17399769	17599854	-0.187727	0.372563	-0.560291	3.12141	76.16	1.12151e-12	3.52135e-11	FALSE
chr2	35800052	35999971	-1.85034	-2.32626	0.475916	4.43524	76.0946	1.13909e-12	3.56703e-11	FALSE
chr8	14000058	14200011	-1.42773	-0.975218	-0.452515	4.19253	75.9139	1.18914e-12	3.71385e-11	TRUE
chr3	148399859	148600082	0.427153	1.02116	-0.594005	3.26523	75.8669	1.20253e-12	3.74572e-11	FALSE
chr17	81600030	81800089	-0.0861339	-0.728872	0.642738	2.75025	75.6327	1.27161e-12	3.9504e-11	FALSE
chr10	60200059	60399927	0.387834	0.0239368	0.363897	4.83419	75.5718	1.29022e-12	3.99764e-11	TRUE
chr7	36000318	36199808	0.360422	0.959504	-0.599082	3.04296	75.5326	1.30237e-12	4.02465e-11	FALSE
chr1	189399731	189599350	0.119726	-0.415254	0.53498	3.56389	75.5166	1.30736e-12	4.02948e-11	FALSE
chr9	41799994	41999931	0.647235	0.216818	0.430417	4.13819	75.4576	1.3259e-12	4.07594e-11	TRUE
chr1	35399945	35599465	1.0701	1.5899	-0.519804	3.90959	75.1653	1.42193e-12	4.3597e-11	FALSE
chr9	113400104	113599783	-0.057319	-0.648524	0.591205	3.01606	74.9951	1.48112e-12	4.52936e-11	FALSE
chr8	118000534	118200247	0.6693	1.25569	-0.586389	3.31752	74.6178	1.62153e-12	4.94588e-11	FALSE
chr1	179799298	180000810	0.330659	-0.169637	0.500295	3.69173	74.5857	1.6341e-12	4.95974e-11	TRUE
chr17	23400235	23600053	1.5433	0.936847	0.606451	3.24459	74.5846	1.63452e-12	4.95974e-11	TRUE
chr1	192599971	192799389	1.13071	0.684909	0.445798	4.13553	74.4395	1.6926e-12	5.12273e-11	TRUE
chr8	91800019	91999720	-0.158165	0.320384	-0.478548	3.79573	74.1505	1.81466e-12	5.47802e-11	FALSE
chr3	132399954	132600291	0.356756	-0.323111	0.679867	2.51701	74.045	1.86144e-12	5.60485e-11	TRUE
chr7	48399964	48599880	0.0195989	-0.72389	0.743489	2.35121	73.9725	1.8943e-12	5.6892e-11	FALSE
chr8	108399870	108600146	1.16115	0.698634	0.462514	4.02427	73.7242	2.0115e-12	6.02579e-11	TRUE
chr6	131200086	131399936	-0.252609	-0.953419	0.700811	2.50186	73.6931	2.02671e-12	6.05589e-11	FALSE
chr16	96200591	96400093	-1.32805	-0.839469	-0.488586	3.87147	73.6288	2.0585e-12	6.13527e-11	TRUE
chr2	122799935	123000188	-0.887582	-0.333293	-0.554289	3.31857	73.4302	2.15998e-12	6.42142e-11	TRUE
chr7	124800121	124999976	0.177926	-0.374286	0.552212	3.19945	73.3413	2.20706e-12	6.54482e-11	FALSE
chr1	16400541	16599932	0.504126	-0.0369885	0.541115	3.41962	73.2659	2.24781e-12	6.64887e-11	TRUE
chr6	112600064	112799915	1.52016	1.05321	0.466948	4.04393	73.048	2.37001e-12	6.99272e-11	TRUE
chr11	35800270	36000160	-0.588175	-1.14494	0.556767	3.40993	72.5571	2.67103e-12	7.86114e-11	FALSE
chr18	14800091	14999922	2.16836	1.69303	0.47533	4.30304	72.3849	2.7857e-12	8.17812e-11	TRUE
chr13	30999470	31200076	-0.309454	0.153907	-0.463362	3.8884	72.1953	2.91789e-12	8.54482e-11	TRUE
chr2	161200136	161399946	0.250684	0.810938	-0.560254	3.17107	72.1345	2.96161e-12	8.65129e-11	FALSE
chr3	99799905	100000237	-0.34511	-0.974958	0.629848	2.8197	72.0515	3.02247e-12	8.80717e-11	FALSE
chr7	96599631	96799468	-0.527485	0.0207128	-0.548198	3.09384	72.0344	3.03512e-12	8.82213e-11	TRUE
chr9	117599941	117799904	-0.553196	-1.10487	0.551677	3.32533	72.0114	3.05229e-12	8.85012e-11	FALSE
chr3	144200111	144399991	-0.532342	-0.981891	0.449549	4.00549	71.8739	3.15693e-12	9.131e-11	FALSE
chrX	85400012	85599941	0.297639	-0.473689	0.771328	2.08253	71.7024	3.29256e-12	9.4999e-11	FALSE
chr7	78399980	78599835	0.976243	0.549376	0.426867	4.12559	71.6313	3.35063e-12	9.64374e-11	TRUE
chr7	64600195	64799966	-0.168879	-0.704809	0.53593	3.46836	71.5503	3.41797e-12	9.8135e-11	FALSE
chr11	76999306	77200464	0.811944	0.397401	0.414543	4.28192	71.4618	3.49318e-12	1.0005e-10	TRUE
chr3	59000094	59200026	0.982238	1.45792	-0.475679	3.96689	71.3107	3.6255e-12	1.03587e-10	FALSE
chr1	81399714	81599869	0.440698	1.20961	-0.76891	2.31227	71.1037	3.81533e-12	1.08576e-10	FALSE
chr2	34599782	34800134	0.0393774	0.413103	-0.373726	4.54342	71.1002	3.8186e-12	1.08576e-10	FALSE
chr8	96199989	96399887	0.0990346	0.810465	-0.71143	2.44843	71.0839	3.83397e-12	1.0875e-10	FALSE
chr8	67799163	68000179	0.462458	-0.0574306	0.519889	3.43744	71.0621	3.85464e-12	1.09072e-10	TRUE
chr3	153599856	153800343	0.285621	-0.175592	0.461213	3.849	70.7637	4.14943e-12	1.17131e-10	TRUE
chr1	192799386	192999757	0.840737	0.416107	0.42463	4.22909	70.6849	4.23109e-12	1.1915e-10	TRUE
chr9	94799928	94999917	0.587114	1.04634	-0.459227	3.93133	70.5853	4.33677e-12	1.21834e-10	FALSE
chr13	64399955	64600654	-1.22495	-0.683911	-0.541037	3.45193	70.5207	4.40667e-12	1.23503e-10	TRUE
chr18	4600102	4799888	-0.109081	0.323935	-0.433016	4.04484	70.4272	4.50994e-12	1.26096e-10	FALSE
chr5	63599795	63800719	-0.354125	-1.10421	0.750086	2.29738	70.4085	4.53097e-12	1.26383e-10	FALSE
chr2	39400057	39599683	-0.365443	0.308343	-0.673786	2.47622	70.367	4.57779e-12	1.27386e-10	TRUE
chr7	63999947	64199879	-0.715718	-0.313252	-0.402466	4.38149	70.2614	4.69932e-12	1.30459e-10	TRUE
chr3	22399883	22600339	-0.298554	0.328114	-0.626668	2.75359	70.2494	4.71331e-12	1.30539e-10	FALSE
chr4	142399877	142599867	0.0489129	0.605151	-0.556238	3.19208	70.2271	4.7395e-12	1.30955e-10	FALSE
chr12	26600062	26799668	0.150832	0.701503	-0.55067	3.09141	70.1544	4.82585e-12	1.33028e-10	FALSE
chr10	126200074	126400281	0.0421918	-0.514197	0.556389	3.01697	70.1257	4.86033e-12	1.33665e-10	FALSE
chr13	48000204	48200013	-0.364238	-0.94928	0.585041	3.00761	69.9432	5.08593e-12	1.39542e-10	FALSE
chr1	188600013	188799984	-0.152067	-0.757037	0.604969	2.82716	69.7587	5.32505e-12	1.45762e-10	FALSE
chr14	36000033	36200330	-0.0982062	0.496798	-0.595004	2.89653	69.6164	5.51731e-12	1.50674e-10	FALSE
chr5	105000183	105199831	-0.190151	0.286517	-0.476668	3.75427	69.4911	5.6924e-12	1.55095e-10	FALSE
chr19	39799996	39999854	0.283064	-0.391746	0.67481	2.51685	69.3777	5.85592e-12	1.59181e-10	FALSE
chr1	121199512	121400543	1.05743	0.528092	0.529336	3.41406	69.3587	5.88389e-12	1.59572e-10	TRUE
chr13	57999672	58200025	1.63301	2.25275	-0.619736	3.44242	69.1984	6.12443e-12	1.65712e-10	FALSE
chr4	21999792	22199972	0.161834	0.768804	-0.60697	2.87758	69.1702	6.16787e-12	1.66504e-10	FALSE
chr16	7799862	8000073	-0.485481	-1.0485	0.563015	3.1765	69.1143	6.25465e-12	1.68459e-10	FALSE
chr5	66199600	66399903	-1.77526	-1.27521	-0.500051	3.90542	69.0997	6.27762e-12	1.68691e-10	TRUE
chr8	92199954	92400161	-0.0596686	-0.549929	0.49026	3.69586	69.0583	6.34299e-12	1.70059e-10	FALSE
chr4	35400529	35600542	-0.450273	0.212026	-0.6623	2.55064	69.029	6.38973e-12	1.70922e-10	TRUE
chr14	117800022	118000606	0.240042	-0.38361	0.623652	2.68688	68.9598	6.50145e-12	1.73515e-10	FALSE
chr10	93800120	94000020	-0.0338575	0.361443	-0.3953	4.2548	68.9501	6.51736e-12	1.73545e-10	FALSE
chr12	38399926	38599949	0.109158	0.802474	-0.693316	2.52828	68.8138	6.74392e-12	1.79172e-10	FALSE
chr2	173800128	173999937	-0.215805	0.173626	-0.389432	4.30356	68.8027	6.76265e-12	1.79264e-10	TRUE
chr14	77399844	77599335	-0.392425	0.0557485	-0.448174	3.98246	68.7552	6.8439e-12	1.81009e-10	TRUE
chr11	31400235	31599950	0.0255708	-0.537549	0.56312	2.99137	68.6641	7.00222e-12	1.8478e-10	FALSE
chr11	43399954	43599819	1.1262	1.6888	-0.562598	3.45917	68.6285	7.06507e-12	1.85817e-10	FALSE
chr12	38199968	38399929	0.0276222	0.71017	-0.682548	2.48452	68.6239	7.07317e-12	1.85817e-10	FALSE
chr8	127600006	127799908	0.581166	0.96412	-0.382954	4.50652	68.5201	7.26015e-12	1.90303e-10	FALSE
chr7	89799786	90000107	1.49256	0.94332	0.549236	3.45153	68.4969	7.30277e-12	1.90994e-10	TRUE
chr11	74200069	74400238	0.282695	-0.260392	0.543087	3.0628	68.4609	7.36916e-12	1.92302e-10	TRUE
chr13	34200162	34400066	-0.196222	0.32027	-0.516492	3.50588	68.4088	7.46644e-12	1.94409e-10	FALSE
chr11	90400350	90600315	-0.775187	-1.32031	0.545126	3.368	68.155	7.95937e-12	2.06785e-10	FALSE
chr5	53799802	54000063	0.525818	0.0502857	0.475532	3.68815	68.1196	8.03074e-12	2.08179e-10	TRUE
chr2	33799960	34000182	0.407319	0.0318345	0.375484	4.4889	68.0214	8.23216e-12	2.1293e-10	TRUE
chr6	121599217	121800146	0.0148797	0.66907	-0.65419	2.52645	67.9956	8.28593e-12	2.1385e-10	FALSE
chr8	88600024	88799699	-1.74385	-2.33746	0.593609	3.61857	67.9863	8.30546e-12	2.13884e-10	FALSE
chr7	64399130	64600198	-0.801002	-0.285787	-0.515215	3.45619	67.9375	8.4083e-12	2.16058e-10	TRUE
chr13	90600068	90799499	-0.59862	-1.28464	0.686022	2.58239	67.8025	8.70006e-12	2.23067e-10	FALSE
chr9	82600109	82800172	0.0934194	-0.484724	0.578143	2.88521	67.7469	8.82337e-12	2.25736e-10	FALSE
chr1	166999924	167200239	0.589498	0.0886728	0.500825	3.53508	67.6865	8.95915e-12	2.28711e-10	TRUE
chr8	95999971	96199992	0.31366	1.03205	-0.718393	2.34077	67.6308	9.08638e-12	2.3121e-10	FALSE
chr19	26800406	27000023	0.362567	0.801628	-0.439061	4.04948	67.6264	9.09641e-12	2.3121e-10	FALSE
chr13	92200411	92399983	0.826445	0.321495	0.50495	3.52821	67.5925	9.17484e-12	2.327e-10	TRUE
chr10	92399906	92599940	-0.158361	-0.688785	0.530425	3.14369	67.4382	9.54078e-12	2.4146e-10	FALSE
chr13	91799870	91996644	-0.327111	0.170623	-0.497734	3.55791	67.4192	9.58668e-12	2.421e-10	TRUE
chr8	84400334	84599914	-0.0787436	-0.488129	0.409386	4.11457	67.2486	1.00108e-11	2.52267e-10	FALSE
chr15	52999944	53199822	0.846541	0.388114	0.458427	3.84757	67.1753	1.01989e-11	2.56327e-10	TRUE
chr9	116800032	116999576	0.374948	0.91369	-0.538742	3.33543	67.1689	1.02155e-11	2.56327e-10	FALSE
chr15	101200534	101400100	-0.533862	-0.119975	-0.413887	4.08048	67.0835	1.04396e-11	2.6139e-10	TRUE
chr2	159199916	159399942	0.314215	0.865694	-0.55148	3.0459	66.8864	1.09764e-11	2.74246e-10	FALSE
chr10	84200059	84400772	-0.182648	-0.696086	0.513438	3.49749	66.6566	1.16385e-11	2.90172e-10	FALSE
chr2	76199668	76398797	0.0260596	-0.481503	0.507562	3.4133	66.5569	1.19384e-11	2.97017e-10	FALSE
chr18	9599999	9800132	-0.298365	-0.87444	0.576075	2.99277	66.3831	1.248e-11	3.09836e-10	FALSE
chr16	8999670	9200204	0.12774	0.61435	-0.486611	3.54858	66.1286	1.33198e-11	3.29987e-10	FALSE
chr5	116799787	117000051	-0.077818	-0.585936	0.508118	3.41793	66.1146	1.33676e-11	3.30221e-10	FALSE
chr9	40200515	40400005	1.18625	1.73343	-0.547183	3.44917	66.1094	1.33855e-11	3.30221e-10	FALSE
chr14	14800470	14999670	0.134783	0.629535	-0.494752	3.75777	66.4366	1.35141e-11	3.32697e-10	FALSE
chr8	48000359	48200011	-0.317156	-0.875337	0.558181	2.99324	65.9803	1.38354e-11	3.39894e-10	FALSE
chr16	96400090	96599593	0.254899	0.74007	-0.485172	3.58092	65.812	1.44459e-11	3.5415e-10	FALSE
chr4	9599638	9799920	-0.466664	-1.02442	0.557752	3.03771	65.7967	1.45027e-11	3.54803e-10	FALSE
chr15	93800434	93999791	-0.261744	-0.732341	0.470597	3.84927	65.7514	1.46727e-11	3.58215e-10	FALSE
chr8	88399907	88600027	-0.0226272	-0.458735	0.436108	3.9215	65.7309	1.475e-11	3.59355e-10	FALSE
chr11	36199335	36400263	0.0901833	0.611484	-0.521301	3.11122	65.6129	1.5204e-11	3.69648e-10	FALSE
chr14	58199951	58400051	0.277885	0.852923	-0.575038	2.91769	65.5896	1.52954e-11	3.71103e-10	FALSE
chr10	4999951	5200081	-0.215264	-0.627466	0.412201	4.1406	65.4773	1.57439e-11	3.81198e-10	FALSE
chr2	49799867	49999914	-0.756358	-0.299719	-0.456639	3.87237	65.2286	1.67854e-11	4.05578e-10	TRUE
chr5	99399971	99599825	-0.243191	0.262922	-0.506113	3.42407	65.1747	1.70205e-11	4.10415e-10	FALSE
chr8	23399633	23600481	0.326538	0.894295	-0.567757	2.92859	65.1399	1.71738e-11	4.13261e-10	FALSE
chr18	31199996	31399994	-0.251827	-0.873999	0.622172	2.67011	65.1254	1.72385e-11	4.13971e-10	FALSE
chr2	48600006	48800402	-0.0125111	-0.540868	0.528356	3.25218	65.1062	1.73238e-11	4.15171e-10	FALSE
chr6	142400216	142599147	0.534072	0.99917	-0.465098	3.87809	64.9098	1.82253e-11	4.35885e-10	FALSE
chr12	21399766	21599589	-1.83462	-2.5553	0.720684	2.9475	64.8549	1.84861e-11	4.41225e-10	FALSE
chr1	95000013	95200034	1.66892	1.07502	0.593897	3.14762	64.8437	1.85399e-11	4.41536e-10	TRUE
chr10	85599233	85800003	-0.259054	-0.775278	0.516224	3.70627	66.8543	1.85744e-11	4.41536e-10	FALSE
chr7	140800215	141000002	1.31288	0.933041	0.379834	4.53841	64.8135	1.86848e-11	4.43265e-10	TRUE
chr7	76600060	76800283	-0.268091	0.267389	-0.53548	3.02746	64.7594	1.89483e-11	4.48608e-10	TRUE
chr14	79799989	80000779	0.0586459	0.682514	-0.623868	2.61091	64.674	1.93721e-11	4.57719e-10	FALSE
chr14	101200422	101399949	0.134542	-0.482435	0.616977	2.6267	64.4381	2.05936e-11	4.85604e-10	FALSE
chr3	134999981	135199889	0.153369	-0.502435	0.655804	2.52008	64.3866	2.08709e-11	4.91156e-10	FALSE
chr18	85200030	85400357	-0.325839	0.19885	-0.524689	3.0487	64.3757	2.093e-11	4.91562e-10	TRUE
chr7	46000105	46199966	0.256743	0.684603	-0.427859	4.07479	64.6216	2.14867e-11	5.0363e-10	FALSE
chr15	73000406	73200136	-0.894521	-0.484921	-0.4096	4.11188	64.1584	2.21454e-11	5.18034e-10	TRUE
chr1	154999793	155200469	2.65373	2.1424	0.511332	4.15315	64.1007	2.24799e-11	5.24814e-10	TRUE
chr19	54800298	54999642	-0.319361	-0.858848	0.539488	3.04983	63.9839	2.31738e-11	5.3994e-10	FALSE
chr5	104200052	104400095	-0.307535	0.239384	-0.54692	2.97302	63.9009	2.36807e-11	5.50658e-10	TRUE
chr4	94199797	94399877	0.250887	-0.335715	0.586603	2.79255	63.836	2.40842e-11	5.58935e-10	FALSE
chr10	126600213	126799855	-0.672961	-1.33234	0.659381	2.65587	63.7994	2.43151e-11	5.6318e-10	FALSE
chr15	72399980	72600121	1.29524	0.837084	0.458153	3.84388	63.6249	2.5448e-11	5.8826e-10	TRUE
chr3	96399869	96600317	0.312671	-0.118583	0.431254	3.98061	63.4483	2.665e-11	6.14835e-10	TRUE
chr11	116199840	116400033	-0.308284	0.0157149	-0.323999	4.91966	63.2911	2.77686e-11	6.39386e-10	TRUE
chr10	81999934	82199273	1.42491	0.681779	0.743134	2.59248	66.2213	2.8579e-11	6.56758e-10	TRUE
chr14	18399945	18599981	-0.208581	0.245109	-0.45369	3.7692	63.1024	2.91759e-11	6.69166e-10	FALSE
chr4	136800480	136999956	-0.576197	-0.217116	-0.359081	4.51954	62.9678	3.02245e-11	6.91865e-10	TRUE
chrX	85199548	85400015	0.177219	-0.5385	0.71572	2.19618	62.9441	3.04128e-11	6.94821e-10	FALSE
chr1	139199893	139399860	-1.23844	-1.83581	0.597369	3.01576	62.9265	3.05541e-11	6.96693e-10	FALSE
chr1	193800046	193999921	0.0044374	0.517539	-0.513102	3.08987	62.849	3.11824e-11	7.0964e-10	FALSE
chr19	25800191	25999986	0.103719	0.651927	-0.548208	2.94946	62.5635	3.36141e-11	7.63501e-10	FALSE
chr6	98400572	98599796	1.05502	0.593297	0.461721	3.8197	62.5501	3.37327e-11	7.64717e-10	TRUE
chr15	57199394	57399934	-0.205092	-0.862713	0.657621	2.40591	62.3411	3.56427e-11	8.0646e-10	FALSE
chr13	64600651	64799949	-0.252702	0.365133	-0.617836	2.56033	62.2857	3.61677e-11	8.16765e-10	FALSE
chr11	96000000	96199355	-0.717914	-0.316868	-0.401046	4.10075	62.0546	3.84435e-11	8.66491e-10	TRUE
chr8	36200188	36400022	-1.56043	-2.08918	0.528746	3.7178	62.0416	3.85758e-11	8.67808e-10	FALSE
chr13	24800094	24999999	-2.19024	-2.72363	0.533389	3.97961	61.9643	3.93727e-11	8.83336e-10	FALSE
chr18	83799792	84000054	1.00734	0.570891	0.436448	3.88907	61.9601	3.94165e-11	8.83336e-10	TRUE
chr4	69999882	70199664	0.423167	-0.120148	0.543314	2.92772	61.8988	4.00617e-11	8.96084e-10	TRUE
chr15	92999107	93199960	0.295535	-0.242886	0.53842	2.95183	61.8021	4.1101e-11	9.17584e-10	TRUE
chr15	89799597	89999826	0.0978369	0.71748	-0.619643	2.56415	61.762	4.15394e-11	9.25611e-10	FALSE
chr16	42000147	42200067	0.196604	0.796223	-0.599619	2.71484	61.7246	4.19529e-11	9.33054e-10	FALSE
chr4	147400251	147599538	-0.416366	-1.02055	0.604184	2.69483	61.6417	4.28854e-11	9.51991e-10	FALSE
chr3	106000254	106200059	0.369597	0.781554	-0.411956	3.98361	61.5731	4.36735e-11	9.67657e-10	FALSE
chr19	54199984	54399759	-0.00138799	0.494161	-0.495549	3.42486	61.4014	4.57107e-11	1.01089e-09	FALSE
chr18	25800436	26000619	-0.0112814	0.544013	-0.555294	2.84999	61.3533	4.62988e-11	1.02197e-09	FALSE
chr9	58000523	58199569	-0.187011	-0.553508	0.366496	4.34502	61.317	4.67476e-11	1.02994e-09	FALSE
chr17	27400288	27599891	-0.0302395	-0.385193	0.354953	4.52049	61.2934	4.7042e-11	1.03406e-09	FALSE
chr4	34400062	34599970	0.855848	0.32157	0.534279	3.24655	61.2879	4.71107e-11	1.03406e-09	TRUE
chr2	172399774	172600367	0.258418	0.657745	-0.399327	4.16529	61.2496	4.75939e-11	1.04271e-09	FALSE
chr10	55799946	56000344	0.574694	-0.0568002	0.631494	2.58163	61.2296	4.78479e-11	1.04633e-09	TRUE
chr7	75800006	75999713	-0.757833	-0.346517	-0.411316	3.99257	61.0968	4.95697e-11	1.08196e-09	TRUE
chr10	22799944	22999919	0.19379	0.736582	-0.542792	2.93965	61.0649	4.99929e-11	1.08918e-09	FALSE
chr16	48199939	48399692	1.59224	1.08308	0.509162	3.53731	60.9293	5.18331e-11	1.12718e-09	TRUE
chr2	27399852	27600093	-1.09058	-0.732603	-0.357973	4.70786	60.8756	5.2582e-11	1.13968e-09	TRUE
chr1	174599991	174799768	0.147899	0.778519	-0.630619	2.58878	60.8741	5.26023e-11	1.13968e-09	FALSE
chr4	72199583	72399965	-0.385266	-0.99846	0.613194	2.65405	60.846	5.2999e-11	1.14616e-09	FALSE
chr15	93199957	93400214	1.32932	1.871	-0.541682	3.53659	60.7958	5.37137e-11	1.15949e-09	FALSE
chr2	17600075	17799546	0.0717064	0.577134	-0.505428	3.37577	60.7425	5.44833e-11	1.1718e-09	FALSE
chr14	33200055	33400095	-0.073726	-0.53147	0.457745	3.64802	60.7425	5.4484e-11	1.1718e-09	FALSE
chr13	107799948	108000159	-0.473482	-0.879771	0.406289	4.08532	60.7035	5.5055e-11	1.18192e-09	FALSE
chr2	3800052	4000365	-0.715223	-0.294492	-0.420731	3.91468	60.6286	5.61685e-11	1.20362e-09	TRUE
chr2	163199880	163400049	-1.30491	-0.926131	-0.378774	4.37602	60.5329	5.76242e-11	1.23257e-09	TRUE
chr7	13399954	13600084	-1.31614	-0.748345	-0.56779	3.00297	60.3951	5.97904e-11	1.27658e-09	TRUE
chr16	29599804	29799982	2.20513	2.69866	-0.493528	4.22454	60.3003	6.13282e-11	1.30704e-09	FALSE
chr19	43399922	43600134	0.853366	0.423518	0.429848	3.86941	60.281	6.16466e-11	1.31144e-09	TRUE
chr4	152799849	153000067	0.493138	0.977809	-0.484671	3.51128	60.2079	6.2867e-11	1.33499e-09	FALSE
chr12	45000525	45199884	-0.105488	-0.682485	0.576996	2.72479	60.0363	6.58314e-11	1.39541e-09	FALSE
chr4	6200124	6400320	1.39401	0.813055	0.580956	2.94061	60.0091	6.63153e-11	1.40114e-09	TRUE
chr19	17199956	17400169	-0.184056	-0.667877	0.48382	3.41482	60.0077	6.63402e-11	1.40114e-09	FALSE
chr5	141199537	141399778	-0.318019	0.149628	-0.467647	3.63803	59.9727	6.69662e-11	1.40959e-09	TRUE
chr7	78799992	78999990	-0.642196	-0.273125	-0.369071	4.26699	59.9719	6.69807e-11	1.40959e-09	TRUE
chr13	34000262	34200165	0.411091	0.921342	-0.510251	3.12285	59.9639	6.71258e-11	1.41012e-09	FALSE
chr13	23200062	23400403	0.583797	0.0834507	0.500347	3.20405	59.8715	6.88137e-11	1.443e-09	TRUE
chr3	130599885	130799524	1.89974	1.4678	0.431937	4.17886	59.8573	6.90785e-11	1.44597e-09	TRUE
chr10	38600033	38799745	-0.534056	-1.22752	0.693464	2.57103	61.9813	6.93884e-11	1.44987e-09	FALSE
chr14	77799957	77999944	-0.332761	-0.752433	0.419672	3.94009	59.7664	7.07887e-11	1.4765e-09	FALSE
chr5	36599831	36800203	-1.23831	-1.66017	0.421866	4.0917	59.7049	7.19714e-11	1.49851e-09	FALSE
chr5	37200955	37400114	-0.118016	0.361147	-0.479163	3.39126	59.5094	7.58672e-11	1.57683e-09	FALSE
chr8	111800016	112000190	-1.44027	-1.92328	0.483014	3.81758	59.4957	7.61478e-11	1.57987e-09	FALSE
chr16	46600624	46799547	-0.380527	0.112019	-0.492546	3.14342	59.3939	7.82693e-11	1.62102e-09	TRUE
chrX	162999951	163199929	0.0656395	0.682497	-0.616858	2.51992	59.2975	8.03361e-11	1.66089e-09	FALSE
chr1	157600011	157799304	0.581645	1.18616	-0.604515	2.76122	59.2838	8.06322e-11	1.66408e-09	FALSE
chr1	167599768	167800134	-0.473936	-0.953419	0.479483	3.51438	59.2664	8.10128e-11	1.669e-09	FALSE
chr1	170200690	170400058	-0.136649	0.333203	-0.469852	3.47614	58.9678	8.78332e-11	1.80635e-09	FALSE
chr6	59399715	59599772	-0.91983	-1.58202	0.662189	2.65314	58.8892	8.97258e-11	1.83986e-09	FALSE
chr2	28399853	28600220	0.70299	0.279285	0.423705	3.88937	58.8871	8.97761e-11	1.83986e-09	TRUE
chr3	152799546	152999798	0.280356	0.720195	-0.439839	3.81287	58.8471	9.07561e-11	1.85671e-09	FALSE
chr3	40200396	40399272	-0.271851	-0.849195	0.577344	2.7281	58.7658	9.27795e-11	1.8948e-09	FALSE
chr1	36000315	36200108	0.035133	-0.303428	0.338561	4.56426	58.6768	9.50518e-11	1.93784e-09	FALSE
chr1	106600149	106800129	-2.1633	-1.70694	-0.456364	4.0669	58.6481	9.57943e-11	1.94928e-09	TRUE
chr8	14600130	14799934	0.0520097	-0.412938	0.464947	3.51409	58.6423	9.5945e-11	1.94928e-09	FALSE
chr1	16200711	16400544	0.132858	-0.372638	0.505496	3.27859	58.6337	9.61709e-11	1.95049e-09	FALSE
chr6	95600020	95799518	-1.08347	-1.62173	0.538261	3.12193	58.5575	9.81824e-11	1.98785e-09	FALSE
chr6	52199619	52399961	0.862284	0.511324	0.35096	4.53339	58.5113	9.9426e-11	2.00616e-09	TRUE
chr15	56000458	56200175	-0.162533	-0.707738	0.545205	2.85853	58.5112	9.94281e-11	2.00616e-09	FALSE
chr5	4199979	4399931	-0.480018	0.0578848	-0.537902	2.89687	58.4875	1.00072e-10	2.01568e-09	TRUE
chr18	81600082	81799867	-2.76732	-2.35159	-0.415729	4.85087	58.4225	1.01856e-10	2.0481e-09	TRUE
chr4	56600028	56799992	0.14774	-0.304963	0.452703	3.65563	58.3833	1.0295e-10	2.06658e-09	FALSE
chr19	54000294	54199987	-1.02858	-0.611661	-0.416915	3.97891	58.3616	1.03561e-10	2.07529e-09	TRUE
chr5	43999598	44199903	0.310064	-0.10136	0.411424	3.90487	58.1943	1.08391e-10	2.16795e-09	TRUE
chr9	25399588	25600217	-1.3949	-1.95197	0.557065	3.40642	58.1888	1.08554e-10	2.16795e-09	FALSE
chr16	89399922	89599676	0.231971	-0.350785	0.582756	2.63486	58.1414	1.09967e-10	2.19244e-09	FALSE
chr1	13599850	13800248	-1.88306	-1.37911	-0.503957	3.70137	58.1053	1.11058e-10	2.20401e-09	TRUE
chr7	12599745	12799947	0.85982	0.346316	0.513504	3.03114	58.1038	1.11101e-10	2.20401e-09	TRUE
chr12	35800511	35999679	0.670423	0.223511	0.446912	3.70004	58.1035	1.11111e-10	2.20401e-09	TRUE
chr16	45599940	45800060	0.668572	0.241382	0.42719	3.77879	57.9727	1.15153e-10	2.28033e-09	TRUE
chr18	36600285	36800066	-1.67562	-2.2541	0.578476	3.36663	57.7802	1.21376e-10	2.39952e-09	FALSE
chr7	37999950	38200118	-0.0757399	-0.542546	0.466806	3.52873	57.7638	1.21922e-10	2.40627e-09	FALSE
chr14	16600011	16800084	0.416643	0.991485	-0.574842	2.77208	57.683	1.24648e-10	2.45594e-09	FALSE
chr9	46599851	46800107	0.515773	0.999265	-0.483492	3.3822	57.4902	1.31416e-10	2.58495e-09	FALSE
chr18	62800181	62999866	-1.28852	-1.7443	0.455783	3.8501	57.3407	1.3692e-10	2.68872e-09	FALSE
chr1	43199918	43399734	1.91133	1.52104	0.390291	4.57099	57.2217	1.41472e-10	2.77347e-09	TRUE
chr5	129199862	129400220	0.150653	0.57071	-0.420057	3.79802	57.1602	1.43886e-10	2.81608e-09	FALSE
chr3	81800211	81999735	-0.678562	-1.19646	0.517895	3.19264	57.0931	1.46566e-10	2.86378e-09	FALSE
chr8	36400019	36600976	-0.290351	-0.782023	0.491672	3.27551	57.0538	1.48159e-10	2.89009e-09	FALSE
chr11	66599788	66800009	-0.0157159	-0.511887	0.496172	3.12283	57.0306	1.49112e-10	2.90384e-09	FALSE
chr4	150599913	150800666	0.118202	-0.242667	0.360869	4.29098	56.9676	1.51719e-10	2.94974e-09	FALSE
chr7	7000086	7200029	-1.08501	-1.69475	0.609739	2.80019	56.8527	1.56604e-10	3.03967e-09	FALSE
chr17	32000709	32200074	0.122431	-0.230266	0.352697	4.62205	58.0633	1.58552e-10	3.07241e-09	FALSE
chr11	70999898	71199630	-0.208793	0.268826	-0.477619	3.14832	56.7738	1.60049e-10	3.09629e-09	FALSE
chr1	159399950	159600433	0.382298	0.85827	-0.475972	3.54383	56.6951	1.63565e-10	3.15912e-09	FALSE
chr14	36200327	36400462	-0.128704	0.440873	-0.569577	2.68287	56.5977	1.68025e-10	3.23993e-09	FALSE
chr13	52200547	52400062	-0.135623	0.195918	-0.331541	4.7139	56.5319	1.71111e-10	3.29403e-09	FALSE
chr7	138600327	138799953	-0.0874318	-0.579546	0.492114	3.31523	56.3015	1.82379e-10	3.5052e-09	FALSE
chr1	173400182	173600308	0.792969	1.30673	-0.51376	3.25335	56.2445	1.85283e-10	3.55519e-09	FALSE
chr9	109800001	110000049	1.50089	1.0705	0.430393	3.97839	56.1799	1.88632e-10	3.61356e-09	TRUE
chr6	83400135	83599583	-1.14493	-0.749562	-0.395373	4.38779	58.5755	1.91604e-10	3.6645e-09	TRUE
chr7	67199806	67400385	1.71505	1.33817	0.37688	4.50932	56.0882	1.9349e-10	3.69392e-09	TRUE
chr2	8400664	8599983	-0.260261	-0.876245	0.615984	2.43542	56.083	1.93771e-10	3.69392e-09	FALSE
chr5	35399835	35599941	0.393964	-0.0231402	0.417104	3.83946	56.0198	1.97199e-10	3.74969e-09	TRUE
chr12	80799856	81000458	-0.567199	-0.170796	-0.396402	3.95767	56.0174	1.97335e-10	3.74969e-09	TRUE
chr15	42799843	43000025	-0.311309	-0.840013	0.528704	2.9347	55.9717	1.99854e-10	3.79142e-09	FALSE
chr7	34199995	34399983	0.209678	0.694962	-0.485284	3.2106	55.8832	2.04831e-10	3.87957e-09	FALSE
chr2	147200082	147399944	-0.298066	-0.77445	0.476384	3.32447	55.8336	2.07679e-10	3.92716e-09	FALSE
chr7	36800105	37000227	-0.0772389	-0.550278	0.473039	3.30675	55.8251	2.08168e-10	3.93009e-09	FALSE
chr6	97399756	97599569	-1.21369	-0.775638	-0.438047	3.84399	55.8015	2.09538e-10	3.94961e-09	TRUE
chr9	7000619	7199848	0.860117	1.43627	-0.57615	2.86444	55.7802	2.10782e-10	3.96669e-09	FALSE
chr18	30399863	30600338	-0.0526552	0.465785	-0.51844	2.99091	55.7612	2.119e-10	3.97658e-09	FALSE
chr3	14999949	15199706	-0.779749	-1.38323	0.603477	2.76592	55.7598	2.11985e-10	3.97658e-09	FALSE
chr6	15800235	16000278	-0.48874	-1.04586	0.557122	2.92	55.7363	2.13377e-10	3.99631e-09	FALSE
chr11	63399978	63600125	0.158947	0.634149	-0.475203	3.28003	55.7186	2.14427e-10	4.00958e-09	FALSE
chr11	74600070	74800165	1.0123	1.44813	-0.435839	3.83133	55.6221	2.2027e-10	4.11229e-09	FALSE
chr4	130999920	131199961	0.313061	0.722292	-0.40923	3.87141	55.5997	2.2165e-10	4.12952e-09	FALSE
chr13	53199968	53400145	-0.378529	-0.80902	0.430491	3.73971	55.5957	2.21896e-10	4.12952e-09	FALSE
chr12	39800457	40000165	0.350793	-0.128334	0.479127	3.44982	55.8034	2.25594e-10	4.1917e-09	TRUE
chr4	9399261	9599641	-0.257034	-0.733682	0.476648	3.40083	55.5289	2.26067e-10	4.19384e-09	FALSE
chr10	120200259	120399767	-0.147621	0.330032	-0.477653	3.26315	55.5214	2.2654e-10	4.196e-09	FALSE
chr13	51400031	51599532	-0.140688	-0.57363	0.432942	3.73601	55.4944	2.28253e-10	4.22106e-09	FALSE
chr1	90599940	90799921	-0.0122456	0.426188	-0.438434	3.65143	55.4191	2.33101e-10	4.30394e-09	FALSE
chr19	58400186	58600239	-2.27699	-1.85482	-0.422169	4.34627	55.404	2.34087e-10	4.31536e-09	TRUE
chr5	77599852	77799839	-0.277521	0.328813	-0.606334	2.45512	55.3558	2.37259e-10	4.36699e-09	FALSE
chr15	28199896	28399693	-0.908747	-0.431817	-0.476929	3.32788	55.2672	2.43208e-10	4.46947e-09	TRUE
chr9	11800183	12000169	-0.0489774	-0.592141	0.543164	2.85692	55.1884	2.48624e-10	4.56185e-09	FALSE
chr6	143199566	143400274	-0.94943	-0.548746	-0.400683	3.94793	55.1558	2.50899e-10	4.59642e-09	TRUE
chr3	41800024	41999165	-0.423145	0.201256	-0.6244	2.3081	55.1121	2.53983e-10	4.64568e-09	TRUE
chr6	118999762	119200181	0.364829	-0.0622895	0.427118	3.66393	55.0884	2.5568e-10	4.66944e-09	TRUE
chr15	50399840	50600269	1.03413	0.522852	0.511279	3.14044	54.9647	2.64692e-10	4.82651e-09	TRUE
chr7	37799876	37999953	0.370614	-0.154319	0.524932	3.48313	60.7118	2.65213e-10	4.82852e-09	TRUE
chr8	83199961	83399875	0.93951	0.480018	0.459492	3.5892	54.9101	2.68769e-10	4.88569e-09	TRUE
chrX	107400660	107600137	-1.45263	-2.19477	0.742139	2.38675	54.8822	2.70883e-10	4.91651e-09	FALSE
chr14	118000603	118200161	1.40136	1.94146	-0.540098	3.28568	54.8618	2.72438e-10	4.93709e-09	FALSE
chr10	115199738	115400019	1.23377	1.8614	-0.62763	2.72902	54.8363	2.74391e-10	4.96483e-09	FALSE
chr13	101799947	101999919	-0.197211	0.166128	-0.363339	4.19154	54.8053	2.76792e-10	5.00056e-09	TRUE
chr2	46399919	46600321	-0.0793743	-0.653788	0.574414	2.60909	54.7635	2.8005e-10	5.05165e-09	FALSE
chr10	122399247	122599948	1.32483	0.93702	0.387807	4.15445	54.7061	2.84601e-10	5.12587e-09	TRUE
chr3	9800573	9999969	-1.96968	-1.56754	-0.402136	4.26775	54.6913	2.85789e-10	5.13938e-09	TRUE
chr13	22999936	23200065	-0.0296081	-0.519233	0.489625	3.02781	54.6622	2.88136e-10	5.17368e-09	FALSE
chr2	20399921	20600100	0.133819	-0.347699	0.481517	3.0971	54.6334	2.90479e-10	5.20778e-09	FALSE
chr11	8000008	8199871	-0.00936992	-0.509612	0.500242	3.00072	54.6138	2.92082e-10	5.22854e-09	FALSE
chr8	27200060	27399931	-1.26382	-1.79052	0.526703	3.29152	54.4337	3.07253e-10	5.49173e-09	FALSE
chr3	132600288	132799985	0.467139	1.00116	-0.534016	2.86545	54.3783	3.12087e-10	5.56966e-09	FALSE
chr10	4399936	4600594	0.272018	0.634851	-0.362833	4.15315	54.2499	3.23583e-10	5.76234e-09	FALSE
chr12	35999676	36199768	-1.10522	-0.639594	-0.465622	3.49637	54.2468	3.23865e-10	5.76234e-09	TRUE
chr4	6999829	7200233	0.289861	0.664751	-0.37489	4.07095	54.2153	3.26753e-10	5.80494e-09	FALSE
chr13	48400121	48599975	1.55053	2.05471	-0.504176	3.64994	54.1877	3.29309e-10	5.83535e-09	FALSE
chr9	102199363	102399940	-0.079871	-0.545496	0.465625	3.39952	54.1861	3.29459e-10	5.83535e-09	FALSE
chr9	109200077	109400045	-0.342849	0.305784	-0.648632	2.2164	53.9749	3.49699e-10	6.18452e-09	TRUE
chr12	25400116	25599426	-0.523588	-0.182833	-0.340755	4.49334	53.9261	3.54555e-10	6.26097e-09	TRUE
chr9	104599380	104799334	0.546168	1.02513	-0.478962	3.37281	53.8278	3.6455e-10	6.42779e-09	FALSE
chr14	87600097	87799887	-0.478372	0.114803	-0.593175	2.43721	53.8025	3.67171e-10	6.4643e-09	TRUE
chr7	37199679	37398862	0.174302	0.621566	-0.447265	3.50597	53.7452	3.73171e-10	6.55934e-09	FALSE
chr7	44599820	44800396	0.739423	0.363716	0.375707	4.10731	53.7403	3.73687e-10	6.55934e-09	TRUE
chr1	6399611	6600007	-0.203512	0.309507	-0.513019	2.95784	53.722	3.75628e-10	6.58358e-09	FALSE
chr17	33400379	33600532	0.481874	0.109799	0.372075	4.05205	53.5713	3.92021e-10	6.86067e-09	TRUE
chr3	69799974	69999973	-0.670254	-1.24308	0.572828	2.7263	53.5283	3.96828e-10	6.93333e-09	FALSE
chr3	123600033	123800173	-0.0808867	0.562165	-0.643051	2.23281	53.5237	3.97354e-10	6.93333e-09	FALSE
chr5	104000040	104200055	-1.01779	-0.549571	-0.468219	3.44273	53.4899	4.01183e-10	6.98975e-09	TRUE
chr2	47799938	48000023	0.312782	0.871121	-0.55834	2.77213	53.4434	4.0651e-10	7.07207e-09	FALSE
chr7	130399464	130599805	1.24053	0.763298	0.47723	3.42055	53.408	4.10615e-10	7.13292e-09	TRUE
chr6	89200351	89399639	-0.0878294	-0.499423	0.411594	3.78371	53.2754	4.26378e-10	7.3958e-09	FALSE
chr16	10000026	10199887	-0.61401	-1.1097	0.495692	3.09123	53.2197	4.33189e-10	7.50286e-09	FALSE
chr6	135599596	135800027	-0.389237	0.0513338	-0.440571	3.49792	53.1959	4.3613e-10	7.54267e-09	TRUE
chr2	171799991	172000088	-0.479359	-0.993895	0.514535	2.94784	53.1532	4.41454e-10	7.6213e-09	FALSE
chr7	114000140	114199991	0.45439	0.106072	0.348318	4.27189	53.1491	4.41975e-10	7.6213e-09	TRUE
chr1	14600245	14800102	-0.0328833	-0.533129	0.500246	3.00043	53.105	4.4755e-10	7.70613e-09	FALSE
chr13	14199959	14400505	-0.686951	-0.20102	-0.485931	3.0677	53.0838	4.5026e-10	7.74144e-09	TRUE
chr11	110600075	110799876	-0.0558356	0.423078	-0.478913	3.22497	53.0494	4.54692e-10	7.80621e-09	FALSE
chr11	63199637	63399981	0.201653	0.666486	-0.464832	3.30364	53.0399	4.55924e-10	7.81594e-09	FALSE
chr19	52800749	53000045	-0.0158684	-0.545454	0.529586	2.80285	52.9672	4.65475e-10	7.96804e-09	FALSE
chr18	7400156	7599986	0.0745576	-0.384829	0.459386	3.37264	52.9564	4.66904e-10	7.98087e-09	FALSE
chr13	65000153	65200271	-0.577654	-1.11482	0.537166	2.87084	52.9269	4.70845e-10	8.03654e-09	FALSE
chr7	92800143	93000004	-1.78133	-2.36664	0.585304	3.17464	52.9134	4.72669e-10	8.05595e-09	FALSE
chr5	63400079	63599798	-0.380038	-1.01352	0.633486	2.29185	52.9044	4.73887e-10	8.06501e-09	FALSE
chr8	27399928	27600105	-0.42954	0.169896	-0.599436	2.39878	52.825	4.84733e-10	8.23766e-09	TRUE
chr15	10199528	10400056	0.138723	-0.343984	0.482707	3.25938	52.8155	4.86048e-10	8.24806e-09	FALSE
chr1	62799908	63000079	-0.128511	-0.59802	0.469509	3.27662	52.7923	4.89283e-10	8.29099e-09	FALSE
chr11	23799893	23999445	-2.03368	-1.57109	-0.46259	3.85727	52.6916	5.03557e-10	8.52057e-09	TRUE
chr7	3199966	3400119	1.08994	1.73192	-0.641974	2.57073	52.682	5.04947e-10	8.53179e-09	FALSE
chr8	116999977	117199311	0.837452	0.491287	0.346165	4.38155	52.6474	5.09967e-10	8.60422e-09	TRUE
chr9	105199679	105399972	-0.997458	-1.41865	0.421196	3.86993	52.6351	5.1175e-10	8.62192e-09	FALSE
chr2	17799543	18000016	0.609898	0.191857	0.418042	3.81477	52.6148	5.14734e-10	8.65978e-09	TRUE
chr2	18000013	18200049	0.887543	0.474684	0.412859	3.79053	52.5968	5.1739e-10	8.692e-09	TRUE
chr8	12800207	12999585	0.827837	0.475755	0.352082	4.29324	52.5609	5.22728e-10	8.76913e-09	TRUE
chr1	163600237	163800056	-0.1392	-0.648705	0.509505	2.87869	52.509	5.30556e-10	8.88776e-09	FALSE
chr9	48199261	48400473	0.110937	0.546955	-0.436018	3.54503	52.4816	5.34727e-10	8.94487e-09	FALSE
chr5	100200002	100400172	0.203998	-0.180624	0.384621	3.94402	52.4605	5.3796e-10	8.97891e-09	TRUE
chr13	59200031	59400093	0.244354	-0.202912	0.447266	3.46364	52.4584	5.38291e-10	8.97891e-09	TRUE
chr19	6600081	6814128	0.282197	-0.194563	0.47676	3.05646	52.2939	5.64257e-10	9.39868e-09	TRUE
chr3	27200103	27399972	0.594939	1.0092	-0.41426	3.79187	52.2691	5.68294e-10	9.45251e-09	FALSE
chr14	21799885	21999763	-0.67293	-0.233092	-0.439838	3.70971	52.4741	5.73852e-10	9.52459e-09	TRUE
chr5	97799149	97999925	0.39805	-0.0706435	0.468694	3.26247	52.2327	5.74249e-10	9.52459e-09	TRUE
chr2	26800017	26999942	0.645157	0.336414	0.308743	4.77587	52.1454	5.88825e-10	9.75257e-09	TRUE
chr17	27199278	27400291	-0.0768831	0.281324	-0.358207	4.19997	52.0851	5.99112e-10	9.90897e-09	FALSE
chr14	15600020	15799865	0.456131	0.0982009	0.357931	4.23139	52.0464	6.05808e-10	1.00056e-08	TRUE
chr14	58000208	58199954	-0.621666	-0.157415	-0.464252	3.31722	52.0088	6.1238e-10	1.01e-08	TRUE
chr4	74400310	74599933	-0.645	-0.0300996	-0.614901	2.28138	51.9283	6.2673e-10	1.03156e-08	TRUE
chr15	93999788	94199912	-1.37854	-1.84587	0.467334	3.80519	51.9256	6.2721e-10	1.03156e-08	FALSE
chr12	108600052	108800075	0.871738	0.478613	0.393125	3.95627	51.9051	6.30913e-10	1.0362e-08	TRUE
chr4	131599496	131799422	-0.855292	-1.28512	0.429828	3.72302	51.7915	6.51882e-10	1.06914e-08	FALSE
chr1	6799962	6999652	0.227454	-0.244236	0.47169	3.09097	51.7463	6.60435e-10	1.08166e-08	FALSE
chr2	178598957	178800106	0.291919	-0.130401	0.42232	3.61654	51.7081	6.67728e-10	1.09208e-08	TRUE
chr18	54000702	54200026	-0.135219	0.331065	-0.466284	3.303	51.6702	6.75067e-10	1.10255e-08	FALSE
chr9	10999911	11200047	0.180145	0.710051	-0.529906	2.78841	51.586	6.91655e-10	1.12807e-08	FALSE
chr4	8999969	9199848	-1.21978	-0.828316	-0.391463	4.03944	51.5318	7.02567e-10	1.14428e-08	TRUE
chr11	7000536	7199897	0.115352	-0.353106	0.468458	3.08309	51.3053	7.50082e-10	1.21997e-08	FALSE
chr8	9200098	9400526	-0.0770799	0.407069	-0.484149	3.12089	51.4742	7.63618e-10	1.24027e-08	FALSE
chr12	76799376	76999661	-0.00241692	0.324937	-0.327354	4.39885	50.9594	8.29107e-10	1.34478e-08	FALSE
chr7	50200010	50400764	0.199958	0.769516	-0.569558	2.54648	50.9	8.43521e-10	1.36522e-08	FALSE
chr13	46800262	47000266	-0.498828	-0.881298	0.382471	3.95011	50.8979	8.44033e-10	1.36522e-08	FALSE
chr19	38800384	38999776	-0.878755	-1.45631	0.577551	2.66453	50.8838	8.47485e-10	1.36892e-08	FALSE
chr13	105200037	105399684	-0.482161	-0.983859	0.501698	2.93553	50.749	8.81319e-10	1.42161e-08	FALSE
chr1	185199788	185399851	-0.412599	-0.907479	0.49488	2.94889	50.6974	8.94636e-10	1.44111e-08	FALSE
chr17	52000068	52200013	-0.304825	-0.614411	0.309586	4.73871	50.6549	9.05773e-10	1.45705e-08	FALSE
chr11	44999979	45199967	-0.859905	-0.458895	-0.40101	3.83525	50.5702	9.2838e-10	1.49138e-08	TRUE
chr12	32599654	32800995	0.710624	0.295013	0.415611	3.76971	50.5627	9.30394e-10	1.49257e-08	TRUE
chr18	6600220	6799873	0.360686	0.83024	-0.469554	3.20276	50.4986	9.47934e-10	1.51863e-08	FALSE
chr6	88800041	89000361	-0.56897	-0.236595	-0.332375	4.37538	50.4402	9.64184e-10	1.54256e-08	TRUE
chr5	115799602	116000079	-1.27642	-1.68771	0.411292	3.95003	50.3876	9.79093e-10	1.56428e-08	FALSE
chr13	9000057	9200159	0.307395	0.782827	-0.475432	3.67421	54.5807	9.92908e-10	1.5842e-08	FALSE
chr4	138399935	138600821	0.19431	0.568581	-0.374271	3.9868	50.3279	9.96265e-10	1.58571e-08	FALSE
chr4	114199942	114399702	1.21123	1.72053	-0.509296	3.10769	50.327	9.96552e-10	1.58571e-08	FALSE
chr15	89600032	89799600	0.0718782	0.593822	-0.521944	2.75472	50.3206	9.98409e-10	1.58636e-08	FALSE
chr13	49199861	49400779	-0.686525	-1.04313	0.356608	4.20833	50.3163	9.99666e-10	1.58636e-08	FALSE
chr1	174000250	174200055	-0.715852	-1.24039	0.524538	3.02384	50.5067	1.00921e-09	1.59934e-08	FALSE
chr7	89400148	89599975	-0.574849	-0.105665	-0.469184	3.10276	50.2696	1.01335e-09	1.60375e-08	TRUE
chr17	18000021	18199847	0.407639	0.984069	-0.57643	2.60614	50.2538	1.01805e-09	1.60902e-08	FALSE
chr10	54399509	54599970	-0.757261	-0.284508	-0.472753	3.08482	50.2451	1.02064e-09	1.61094e-08	TRUE
chr7	124999973	125200144	0.52898	0.0917897	0.437191	3.41487	50.1704	1.04313e-09	1.64423e-08	TRUE
chr6	127600294	127800105	-0.80693	-0.44283	-0.3641	4.08415	50.1631	1.04538e-09	1.64556e-08	TRUE
chr18	85400354	85600178	-0.4276	0.050151	-0.477751	3.03678	50.147	1.0503e-09	1.65109e-08	TRUE
chr3	131373186	131599676	-0.713899	-1.24241	0.528509	2.84906	50.1317	1.05499e-09	1.65451e-08	FALSE
chr17	56000102	56200107	1.77988	2.15089	-0.371015	4.52318	50.1308	1.05529e-09	1.65451e-08	FALSE
chr15	63799779	64000053	2.10399	1.5666	0.53739	3.24145	50.0527	1.07965e-09	1.69044e-08	TRUE
chr15	27000008	27200016	-0.252803	-0.7815	0.528697	2.74402	50.042	1.08304e-09	1.69349e-08	FALSE
chr1	172000014	172200329	-0.453845	-0.77333	0.319485	4.55112	50.0372	1.08456e-09	1.69362e-08	FALSE
chr13	56999794	57200350	-0.0497257	0.417915	-0.46764	3.21282	50.0073	1.09409e-09	1.70624e-08	FALSE
chr6	65599785	65799633	0.227951	0.671415	-0.443464	3.44667	49.8997	1.12906e-09	1.75844e-08	FALSE
chr3	38201118	38400004	0.366318	0.704134	-0.337816	4.46647	49.877	1.13659e-09	1.76782e-08	FALSE
chr13	56799882	56999797	-0.364944	0.0550697	-0.420013	3.58326	49.8723	1.13817e-09	1.76793e-08	TRUE
chr10	37000056	37200084	2.25036	2.72996	-0.479599	4.00403	49.859	1.1426e-09	1.77246e-08	FALSE
chr19	42800045	43000017	0.0620626	0.505957	-0.443895	3.3908	49.7797	1.16947e-09	1.81176e-08	FALSE
chr3	35198909	35399827	-0.523895	-0.992043	0.468149	3.2264	49.7566	1.17741e-09	1.82165e-08	FALSE
chr6	15199783	15399091	0.227673	0.791265	-0.563592	2.61415	49.7324	1.18579e-09	1.8322e-08	FALSE
chr18	3600248	3800030	0.568453	1.04977	-0.481314	3.25747	49.5757	1.24158e-09	1.91589e-08	FALSE
chr1	121799554	121999566	-0.482318	-0.0321602	-0.450158	3.29513	49.5371	1.25576e-09	1.93522e-08	TRUE
chr4	144599870	144800042	0.823	0.283427	0.539573	2.9621	51.9246	1.29319e-09	1.9903e-08	TRUE
chr8	90399579	90600414	-0.273742	-0.729633	0.455891	3.29678	49.3767	1.31637e-09	2.02331e-08	FALSE
chr15	3800341	4000423	0.961813	0.477765	0.484049	3.02106	49.3645	1.32113e-09	2.02798e-08	TRUE
chr7	45000106	45199763	0.490873	0.807311	-0.316437	4.55552	49.3574	1.32388e-09	2.02955e-08	FALSE
chr11	71199627	71399888	1.03832	1.54163	-0.503304	3.21413	49.2943	1.34868e-09	2.06488e-08	FALSE
chr9	15199698	15399985	-1.46406	-1.02092	-0.443134	3.67395	49.2731	1.35713e-09	2.07511e-08	TRUE
chr13	20999210	21200376	1.30809	0.873044	0.43505	3.72262	49.2003	1.38652e-09	2.11693e-08	TRUE
chr16	91600000	91800081	-0.740782	-0.400397	-0.340385	4.30616	49.1965	1.38809e-09	2.11693e-08	TRUE
chr6	120999657	121200013	-0.749133	-1.0829	0.333771	4.43552	49.0857	1.43418e-09	2.18439e-08	FALSE
chr13	101599977	101799950	-1.14206	-0.806884	-0.335172	4.4979	48.9519	1.49194e-09	2.26942e-08	TRUE
chr3	39199890	39399925	0.0638164	0.57944	-0.515624	2.82046	48.8692	1.52884e-09	2.32253e-08	FALSE
chr3	127999895	128200082	-0.266321	-0.739289	0.472968	3.0339	48.7928	1.56375e-09	2.37249e-08	FALSE
chr5	19599501	19799938	0.082198	0.607341	-0.525143	2.76264	48.7738	1.57257e-09	2.38178e-08	FALSE
chr4	57599495	57800879	1.29679	0.940314	0.356476	4.21378	48.7709	1.57392e-09	2.38178e-08	TRUE
chr13	37400063	37600011	2.33165	1.93096	0.400689	4.86346	53.2454	1.62872e-09	2.46152e-08	TRUE
chr16	62599759	62800176	0.540455	-0.0115523	0.552007	2.55668	48.6479	1.63224e-09	2.46368e-08	TRUE
chr6	128599965	128799941	1.08684	0.643542	0.443296	3.43315	48.625	1.64334e-09	2.47724e-08	TRUE
chr15	33800122	34000114	0.471273	-0.0471322	0.518405	2.72495	48.6183	1.64661e-09	2.47899e-08	TRUE
chr8	104000040	104199584	0.459339	0.892641	-0.433302	3.45414	48.6084	1.65145e-09	2.4831e-08	FALSE
chr2	78400098	78599537	0.436516	-0.0392682	0.475784	2.96315	48.5909	1.66005e-09	2.49284e-08	TRUE
chr3	129200039	129399796	1.60342	2.07366	-0.470245	3.65985	48.5517	1.67942e-09	2.51871e-08	FALSE
chr14	104799701	104999719	0.0443705	-0.489286	0.533657	2.69946	48.5314	1.68959e-09	2.53071e-08	FALSE
chr10	37399965	37600023	-0.555712	-0.182107	-0.373605	3.95571	48.5193	1.69563e-09	2.53653e-08	TRUE
chr12	90199733	90399892	-0.264659	-0.760925	0.496266	2.96042	48.4666	1.72235e-09	2.57323e-08	FALSE
chr5	117400023	117599945	-0.353558	0.00882435	-0.362383	4.00287	48.3879	1.76304e-09	2.63068e-08	TRUE
chr9	42600174	42800229	-0.513342	-0.178148	-0.335194	4.26531	48.3685	1.77319e-09	2.64246e-08	TRUE
chr7	138400025	138600330	-0.459828	-0.897523	0.437695	3.4018	48.349	1.78348e-09	2.65442e-08	FALSE
chr1	105000000	105200537	0.296658	0.833541	-0.536884	2.6816	48.325	1.79627e-09	2.67007e-08	FALSE
chr9	86399976	86600400	0.106946	-0.361718	0.468664	3.23322	48.5161	1.80497e-09	2.67962e-08	FALSE
chr2	164999573	165199192	-0.0754574	0.248755	-0.324213	4.36263	48.2946	1.81255e-09	2.68748e-08	FALSE
chr10	66800110	67000120	2.75678	3.3093	-0.552523	3.89572	48.2885	1.81583e-09	2.68894e-08	FALSE
chr6	82399741	82599909	0.210685	-0.238404	0.449088	3.0793	48.1819	1.87426e-09	2.77196e-08	FALSE
chr15	95400272	95600104	-0.186414	-0.638687	0.452273	3.18129	48.1669	1.88263e-09	2.78084e-08	FALSE
chr11	51400077	51600183	0.492268	0.118603	0.373665	3.88933	48.0886	1.92699e-09	2.84242e-08	TRUE
chr12	97800088	97999737	0.223173	-0.312377	0.53555	2.6571	48.0849	1.92916e-09	2.84242e-08	FALSE
chr3	154200269	154400122	0.0864498	-0.368571	0.455021	3.0673	48.0779	1.93315e-09	2.84474e-08	FALSE
chr10	97000017	97200097	-1.16718	-1.57643	0.409252	3.93371	48.0706	1.93735e-09	2.84734e-08	FALSE
chr8	14999809	15199573	-1.28796	-1.73659	0.44863	3.65288	48.0637	1.94137e-09	2.84968e-08	FALSE
chr4	33599788	33800980	-0.540818	-0.1074	-0.433418	3.45655	47.965	1.99927e-09	2.93102e-08	TRUE
chr11	95199708	95399999	0.418389	0.0793331	0.339055	4.39559	48.431	2.00439e-09	2.93485e-08	TRUE
chr12	101000151	101200538	-1.78081	-1.34012	-0.440699	3.7059	47.8189	2.08827e-09	3.05386e-08	TRUE
chr8	107800562	107999984	0.678876	1.17638	-0.497499	2.93113	47.7999	2.10011e-09	3.06736e-08	FALSE
chr13	100799923	100999677	0.518779	0.922691	-0.403911	3.75874	47.6795	2.17699e-09	3.1757e-08	FALSE
chr7	49400496	49600289	-0.539224	-0.913843	0.374619	3.95284	47.6462	2.19874e-09	3.20345e-08	FALSE
chr18	79800118	80000010	0.523008	0.0446647	0.478343	2.96613	47.6321	2.20801e-09	3.21298e-08	TRUE
chr2	172199840	172399777	2.01823	2.52696	-0.508733	3.80599	48.0651	2.26872e-09	3.29723e-08	FALSE
chr5	54400005	54600043	-0.465865	0.109643	-0.575507	2.55552	48.0521	2.27741e-09	3.30195e-08	TRUE
chr6	73400016	73599984	0.298491	0.901277	-0.602786	2.2475	47.5283	2.27759e-09	3.30195e-08	FALSE
chr6	142200365	142400219	1.69034	1.22203	0.468303	3.44373	47.5173	2.28512e-09	3.30878e-08	TRUE
chr8	18199662	18399860	0.323549	-0.139148	0.462697	3.00829	47.5117	2.28893e-09	3.31021e-08	TRUE
chr19	53000042	53200077	2.05366	2.525	-0.471335	3.84516	47.4261	2.34834e-09	3.39136e-08	FALSE
chr1	38999793	39199963	1.3693	1.04072	0.328581	4.50096	47.4226	2.35082e-09	3.39136e-08	TRUE
chr10	25999988	26199382	0.468994	0.0733513	0.395642	3.69942	47.3728	2.38609e-09	3.43802e-08	TRUE
chr18	88400060	88600038	-0.0420806	-0.63012	0.588039	2.27469	47.3635	2.39275e-09	3.44339e-08	FALSE
chr8	54400701	54599989	0.485437	-0.0521749	0.537612	2.62899	47.2879	2.44761e-09	3.51802e-08	TRUE
chr10	123000163	123200079	-2.85865	-3.41169	0.553043	3.93762	47.2663	2.46349e-09	3.53653e-08	FALSE
chr13	16199568	16400076	-0.0448986	0.416363	-0.461262	3.08239	47.1859	2.52364e-09	3.61846e-08	FALSE
chr16	47999919	48199942	0.339244	-0.176283	0.515526	2.73857	47.1749	2.53199e-09	3.62599e-08	TRUE
chr2	169600136	169800158	-0.374339	-0.0419841	-0.332355	4.22996	47.1262	2.56924e-09	3.67486e-08	TRUE
chr3	98599979	98800625	0.66455	1.26257	-0.598022	2.37604	47.1178	2.5757e-09	3.67962e-08	FALSE
chr1	40600234	40799860	-0.596421	-1.06713	0.470713	3.02757	47.0343	2.64112e-09	3.76849e-08	FALSE
chr2	27600090	27799813	-0.785946	-0.461125	-0.324822	4.40523	47	2.66848e-09	3.80291e-08	TRUE
chr10	121600118	121800065	-0.328555	0.0442532	-0.372808	3.85942	46.9728	2.69036e-09	3.82944e-08	TRUE
chr2	19399553	19599652	0.484584	0.914288	-0.429704	3.48017	46.966	2.69586e-09	3.83262e-08	FALSE
chr4	130800048	130999923	-0.533092	-0.177019	-0.356073	4.00471	46.9566	2.70353e-09	3.83888e-08	TRUE
chr10	92800024	92999084	-0.646434	-1.11729	0.470858	3.02318	46.8831	2.76397e-09	3.91996e-08	FALSE
chr15	63000219	63199897	-0.359754	0.0275231	-0.387277	3.89715	46.818	2.81864e-09	3.99268e-08	TRUE
chr15	89400279	89600035	-1.63189	-2.09158	0.459683	3.76745	46.8019	2.83234e-09	4.00724e-08	FALSE
chr17	70201465	70399808	-0.202467	-0.742907	0.54044	2.5773	46.7262	2.89767e-09	4.09474e-08	FALSE
chr8	47799645	48000362	-0.321843	-0.778359	0.456516	3.10443	46.7161	2.90652e-09	4.10231e-08	FALSE
chr2	139600141	139799819	1.32942	1.81237	-0.482951	3.35445	46.6514	2.96368e-09	4.17797e-08	FALSE
chr9	11200044	11399600	0.233718	0.738191	-0.504474	2.88393	46.6395	2.97437e-09	4.18801e-08	FALSE
chr5	77200226	77400014	-1.14244	-1.59561	0.453171	3.47775	46.6354	2.97807e-09	4.1882e-08	FALSE
chr2	22200186	22399253	0.0744553	-0.427034	0.501489	2.75615	46.5912	3.01799e-09	4.23927e-08	FALSE
chr16	8199710	8399951	0.652977	0.222862	0.430115	3.34274	46.5718	3.03571e-09	4.2579e-08	TRUE
chr4	110200379	110399961	-0.0439138	0.588643	-0.632556	2.4342	50.2399	3.03851e-09	4.2579e-08	FALSE
chr2	143799405	144000228	1.70801	2.16054	-0.452529	3.75907	46.5387	3.06621e-09	4.2916e-08	FALSE
chr1	95200031	95400365	0.804535	0.341017	0.463518	3.01525	46.5247	3.07918e-09	4.30462e-08	TRUE
chr5	22999701	23199908	-0.248465	-0.733536	0.485071	2.87284	46.5136	3.08955e-09	4.31399e-08	FALSE
chr5	90000077	90200032	0.442491	-0.0174759	0.459967	2.98066	46.5034	3.09909e-09	4.32216e-08	TRUE
chr14	36400459	36599993	-0.0564203	-0.557664	0.501243	2.87137	46.4897	3.11192e-09	4.33491e-08	FALSE
chrX	99000368	99200041	0.988999	1.52725	-0.538255	2.86696	46.4302	3.16836e-09	4.4083e-08	FALSE
chr5	54000060	54199785	-1.57718	-2.05253	0.475351	3.57593	46.364	3.23235e-09	4.48693e-08	FALSE
chr5	119000704	119200031	0.370194	0.787565	-0.417371	3.50658	46.3638	3.23251e-09	4.48693e-08	FALSE
chr5	102200045	102400000	0.188815	0.645554	-0.456738	3.08934	46.288	3.30749e-09	4.58558e-08	FALSE
chr6	108000108	108200032	2.90002	3.49292	-0.592901	3.73681	46.2496	3.34614e-09	4.6337e-08	FALSE
chr1	81599866	81799696	0.312117	0.853974	-0.541857	2.57894	46.2263	3.36983e-09	4.66101e-08	FALSE
chr11	111799639	111999685	-0.10707	0.333716	-0.440786	3.16853	46.1841	3.41313e-09	4.71534e-08	FALSE
chr1	42999442	43199921	1.15819	1.52272	-0.364527	4.14221	46.1462	3.45258e-09	4.76424e-08	FALSE
chr10	78599768	78800001	-0.974478	-0.549486	-0.424992	3.46433	45.9879	3.62221e-09	4.99245e-08	TRUE
chr3	87399816	87599829	0.44406	0.0224796	0.42158	3.44668	45.9811	3.62974e-09	4.99696e-08	TRUE
chr3	35399824	35600062	-0.634159	-1.09394	0.45978	3.12949	45.9506	3.66349e-09	5.03752e-08	FALSE
chr7	117800768	118000307	0.178534	-0.211505	0.390039	3.78158	45.9337	3.68228e-09	5.05743e-08	FALSE
chr2	166399508	166600041	0.314172	0.021332	0.29284	4.83241	45.9182	3.69968e-09	5.07538e-08	TRUE
chr15	31600565	31799973	-0.646534	-0.235048	-0.411487	3.55128	45.9008	3.7193e-09	5.09635e-08	TRUE
chr5	120400197	120599881	1.65071	1.27631	0.37441	4.0934	45.8229	3.80826e-09	5.21217e-08	TRUE
chr13	105399681	105599932	-0.0817225	0.420679	-0.502402	2.73382	45.8047	3.82942e-09	5.23503e-08	FALSE
chr5	34800214	35000306	-0.0289107	0.293267	-0.322178	4.25616	45.7997	3.83519e-09	5.23681e-08	FALSE
chr10	36799396	37000059	0.702578	0.235449	0.467129	2.96332	45.6456	4.01926e-09	5.47194e-08	TRUE
chr18	4200371	4399981	1.11218	0.727646	0.384537	3.86578	45.6446	4.0205e-09	5.47194e-08	TRUE
chr8	71600035	71800052	-1.47231	-1.14307	-0.329238	4.4531	45.6439	4.02136e-09	5.47194e-08	TRUE
chr2	78799450	79000246	0.963969	1.39209	-0.428117	3.73606	45.6012	4.0739e-09	5.53702e-08	FALSE
chr15	68000044	68199597	-0.28936	-0.69644	0.40708	3.61694	45.5335	4.15873e-09	5.64578e-08	FALSE
chr4	104599772	104799997	0.00951	-0.430514	0.440024	3.22615	45.4036	4.32678e-09	5.86713e-08	FALSE
chr7	101400056	101599960	-0.0614598	-0.369805	0.308345	4.54114	45.3207	4.43759e-09	6.01045e-08	FALSE
chr5	108600036	108800330	-2.16514	-2.69296	0.52782	3.48877	45.2937	4.47427e-09	6.05315e-08	FALSE
chr16	55200054	55400026	0.457597	-0.0856519	0.543249	2.50526	45.27	4.50682e-09	6.09017e-08	TRUE
chr3	50599865	50814431	0.0544683	-0.401048	0.455516	3.58075	45.6083	4.62879e-09	6.24781e-08	FALSE
chr4	64200032	64400029	-0.263817	0.270395	-0.534212	2.52992	45.1346	4.69711e-09	6.33274e-08	FALSE
chr19	13000151	13200214	-0.454588	-0.00262411	-0.451964	3.01875	45.1092	4.73384e-09	6.37495e-08	TRUE
chr8	26200030	26399958	0.596294	1.01199	-0.415692	3.55106	45.093	4.75725e-09	6.3947e-08	FALSE
chr12	10199677	10399506	0.202418	-0.258416	0.460834	2.97987	45.0915	4.75941e-09	6.3947e-08	FALSE
chr9	86199677	86399979	0.247999	-0.180887	0.428885	3.26036	45.0675	4.79454e-09	6.43455e-08	TRUE
chr18	37799497	38000214	-0.22377	0.161267	-0.385037	3.88427	45.5666	4.88834e-09	6.55295e-08	TRUE
chr2	129200028	129400020	-1.7222	-1.33384	-0.388359	3.96687	44.9907	4.90858e-09	6.57257e-08	TRUE
chr1	107399998	107600008	0.1247	-0.43329	0.557991	2.38154	44.9589	4.95652e-09	6.62921e-08	FALSE
chr7	35599651	35800233	-0.925777	-1.35756	0.431778	3.50857	44.8077	5.19171e-09	6.92931e-08	FALSE
chr12	16400245	16600213	-0.35027	-0.679374	0.329105	4.21987	44.8071	5.1927e-09	6.92931e-08	FALSE
chr9	12799955	12999907	-0.200832	-0.75899	0.558158	2.4457	44.7811	5.23429e-09	6.97687e-08	FALSE
chr13	59800465	60000758	-0.79468	-0.385827	-0.408853	3.54094	44.7676	5.25587e-09	6.99769e-08	TRUE
chr5	116200377	116400076	0.54513	0.988148	-0.443018	3.36174	44.7618	5.26533e-09	7.00235e-08	FALSE
chr13	6200199	6400416	-0.848128	-1.35075	0.50262	3.11221	46.335	5.33774e-09	7.09062e-08	FALSE
chr9	22999991	23200153	-0.122655	-0.561432	0.438777	3.23762	44.7055	5.35702e-09	7.10819e-08	FALSE
chr5	16200018	16399954	0.596544	1.18937	-0.592824	2.49219	44.8658	5.38942e-09	7.14311e-08	FALSE
chr6	109199991	109400561	-0.459405	0.0681514	-0.527557	2.61547	44.6764	5.40511e-09	7.15399e-08	TRUE
chr18	89600002	89799833	-0.204223	-0.743009	0.538786	2.59416	44.6736	5.40981e-09	7.15399e-08	FALSE
chr18	5000884	5200323	1.27828	0.982228	0.296049	4.80252	44.5799	5.56782e-09	7.35466e-08	TRUE
chr9	82399340	82600112	0.308991	-0.192389	0.50138	2.68104	44.563	5.59668e-09	7.38447e-08	TRUE
chr4	20199886	20400080	-0.235213	0.248004	-0.483217	2.82014	44.5437	5.63005e-09	7.42017e-08	FALSE
chr7	123199959	123399929	-0.556946	-0.957903	0.400958	3.66063	44.4829	5.73626e-09	7.55166e-08	FALSE
chr12	99000073	99199997	1.86842	2.2139	-0.345476	4.66098	44.466	5.76619e-09	7.58257e-08	FALSE
chr17	55399991	55600177	-0.596886	-1.23279	0.635902	2.08255	44.446	5.80181e-09	7.62088e-08	FALSE
chr18	7599983	7800268	-0.37367	-0.891428	0.517758	3.23489	49.9135	5.82207e-09	7.63894e-08	FALSE
chr11	54199986	54399230	0.236666	-0.101812	0.338478	4.0777	44.4057	5.87423e-09	7.69878e-08	TRUE
chr9	101399902	101599521	0.742259	1.21297	-0.470712	3.0127	44.3245	6.0229e-09	7.88483e-08	FALSE
chr1	166400251	166600278	-0.33997	0.161006	-0.500977	2.75109	44.3209	6.02972e-09	7.88496e-08	TRUE
chr10	81400250	81599674	-1.76772	-1.39164	-0.376081	4.23986	44.6865	6.11323e-09	7.98528e-08	TRUE
chr15	36200226	36400227	1.04344	1.38536	-0.341918	4.21272	44.2584	6.1469e-09	8.02034e-08	FALSE
chr1	39999932	40199993	-0.733857	-0.392448	-0.341409	4.05695	44.2385	6.18478e-09	8.06081e-08	TRUE
chr1	80400227	80600108	-0.987814	-0.652454	-0.33536	4.15505	44.2269	6.20696e-09	8.07582e-08	TRUE
chr12	93200344	93399649	-0.159746	-0.69099	0.531244	2.5659	44.2253	6.21006e-09	8.07582e-08	FALSE
chr13	81799819	82000007	-0.798291	-0.327073	-0.471218	2.91403	44.1532	6.34955e-09	8.24809e-08	TRUE
chr19	15400042	15600372	-0.0196765	-0.492233	0.472556	2.87491	44.1358	6.38375e-09	8.28335e-08	FALSE
chr1	130000127	130199962	-0.343783	-0.894935	0.551151	2.48985	44.1224	6.41018e-09	8.30847e-08	FALSE
chr2	52999767	53200167	-2.24615	-2.7412	0.495049	3.79723	44.1053	6.44426e-09	8.34343e-08	FALSE
chr11	30199725	30399757	-0.547373	-0.161756	-0.385617	3.68822	44.0553	6.5444e-09	8.46375e-08	TRUE
chr9	41400103	41599604	-0.495637	-0.114885	-0.380752	3.71631	44.0164	6.62359e-09	8.55674e-08	TRUE
chr1	42799820	42999445	0.66458	1.10509	-0.440511	3.34711	43.9858	6.68649e-09	8.62851e-08	FALSE
chr1	149799878	150000098	0.37544	0.87639	-0.50095	2.71771	43.9758	6.70725e-09	8.6458e-08	FALSE
chr18	45000238	45200604	0.0675539	0.577517	-0.509963	2.68765	43.8928	6.88164e-09	8.86087e-08	FALSE
chr3	30800009	30999751	0.133125	-0.263924	0.397048	3.52944	43.7373	7.22101e-09	9.28765e-08	FALSE
chr7	41200141	41399942	0.766009	0.273982	0.492027	2.79025	43.7231	7.25279e-09	9.31214e-08	TRUE
chr4	70599967	70800292	-0.863661	-0.349804	-0.513857	2.6615	43.7217	7.2559e-09	9.31214e-08	TRUE
chr11	6800539	7000539	0.445428	0.904079	-0.458652	2.96993	43.6239	7.47926e-09	9.58831e-08	FALSE
chr12	24399926	24600185	2.67561	3.37755	-0.701947	2.98631	43.6201	7.48802e-09	9.58908e-08	FALSE
chr19	22599567	22799508	0.299797	-0.139024	0.43882	3.01438	43.6131	7.50432e-09	9.59948e-08	TRUE
chr11	57200093	57400101	-0.55783	-1.00135	0.443517	3.20909	43.5867	7.56593e-09	9.66776e-08	FALSE
chr2	147000084	147200085	-1.25674	-1.73542	0.478685	3.25219	43.5804	7.5809e-09	9.67636e-08	FALSE
chr5	22000178	22200581	0.236843	0.760368	-0.523525	2.64575	43.5457	7.66291e-09	9.77041e-08	FALSE
chr13	9800405	10000043	-0.183538	0.188872	-0.37241	3.79726	43.5216	7.72052e-09	9.83319e-08	FALSE
chr8	47199982	47400034	-0.0765924	-0.495987	0.419395	3.36565	43.5142	7.73819e-09	9.84502e-08	FALSE
chr10	87000291	87199800	-0.216884	0.232165	-0.449048	3.03278	43.5082	7.75274e-09	9.85285e-08	FALSE
chr16	16800138	17000046	0.902934	0.524139	0.378795	3.7604	43.4908	7.79455e-09	9.89528e-08	TRUE
chr3	54599535	54800019	-0.541274	-0.969401	0.428127	3.34052	43.4536	7.88526e-09	9.99963e-08	FALSE
chr1	65400035	65599809	0.307991	0.891862	-0.583871	2.23345	43.3946	8.03108e-09	1.01736e-07	FALSE
chr4	148600066	148800319	-0.0118052	0.327975	-0.33978	4.02102	43.3814	8.06417e-09	1.02045e-07	FALSE
chr13	23800060	24000011	0.161299	0.558383	-0.397084	3.53911	43.3031	8.26273e-09	1.04433e-07	FALSE
chr18	78199677	78400221	-0.741581	-0.358766	-0.382815	3.70937	43.2982	8.27547e-09	1.04433e-07	TRUE
chr4	153600388	153799734	-0.13735	-0.518168	0.380818	3.65246	43.2966	8.27959e-09	1.04433e-07	FALSE
chr9	94599993	94799931	-0.0971156	0.261083	-0.358198	3.88526	43.2652	8.36078e-09	1.05344e-07	FALSE
chr3	151200471	151400015	-0.333535	0.201743	-0.535278	2.47375	43.2032	8.5237e-09	1.07123e-07	TRUE
chr3	75200037	75400274	1.27166	1.76432	-0.492661	3.08153	43.2011	8.52931e-09	1.07123e-07	FALSE
chr2	93600246	93800000	-0.569424	-0.930443	0.36102	3.901	43.2011	8.52936e-09	1.07123e-07	FALSE
chr14	86599516	86800211	0.628337	1.09996	-0.471626	2.92008	43.1378	8.69917e-09	1.09139e-07	FALSE
chr15	24800544	24999777	0.60713	0.129038	0.478092	2.84665	43.0461	8.95139e-09	1.12184e-07	TRUE
chr5	88799218	89000001	-0.255669	0.184111	-0.439781	3.03725	43.0309	8.99379e-09	1.12595e-07	TRUE
chr5	105199828	105399610	-0.36467	-0.748807	0.384137	3.71044	43.0104	9.05157e-09	1.13198e-07	FALSE
chr5	54199782	54400008	-0.592788	-0.149355	-0.443433	3.00274	42.9718	9.16131e-09	1.14448e-07	TRUE
chr15	49799972	50000143	-0.262972	0.220712	-0.483684	3.03868	42.9539	9.21258e-09	1.14966e-07	TRUE
chr15	57600063	57799953	2.68036	3.11672	-0.436354	4.34854	42.944	9.24108e-09	1.152e-07	FALSE
chr6	71000262	71200843	1.71113	2.05557	-0.344439	4.48058	42.94	9.25277e-09	1.15223e-07	FALSE
chr7	18999846	19199270	1.14778	1.49763	-0.349848	4.14268	42.9141	9.32764e-09	1.16032e-07	FALSE
chrX	48599767	48800149	-0.814922	-0.255921	-0.559001	2.38484	42.8995	9.37037e-09	1.16441e-07	TRUE
chr17	8799994	8999949	-1.46126	-1.86794	0.40668	3.85573	42.7816	9.72204e-09	1.20549e-07	FALSE
chrX	100399541	100600034	0.690756	0.143586	0.54717	2.39405	42.7808	9.7243e-09	1.20549e-07	TRUE
chr11	81000125	81199973	0.586125	1.00337	-0.417241	3.43882	42.7784	9.73176e-09	1.20549e-07	FALSE
chr15	94799896	95000048	0.21762	0.701534	-0.483914	2.8242	42.7445	9.83553e-09	1.21706e-07	FALSE
chr17	85199232	85400172	-0.019286	0.385567	-0.404853	3.52901	42.7332	9.87012e-09	1.22005e-07	FALSE
chr8	120600376	120799637	-1.07792	-0.77996	-0.297965	4.57108	42.7242	9.89818e-09	1.22223e-07	TRUE
chr3	135799840	136000053	-0.652204	-0.257926	-0.394278	3.59431	42.6979	9.97989e-09	1.23103e-07	TRUE
chr5	145400200	145599988	-0.119326	0.392091	-0.511418	2.58256	42.6804	1.00345e-08	1.23647e-07	FALSE
chr1	172200326	172399457	-1.47975	-1.82609	0.346336	4.33262	42.6227	1.02176e-08	1.25771e-07	FALSE
chr7	84800029	85000013	-0.648387	-0.136677	-0.51171	2.57724	42.6061	1.02708e-08	1.26293e-07	TRUE
chr4	114399699	114600164	0.93365	1.33671	-0.403064	3.6346	42.5685	1.03923e-08	1.27653e-07	FALSE
chr1	63000076	63200080	-0.0951013	-0.603214	0.508112	2.75833	42.508	1.05913e-08	1.29962e-07	FALSE
chr9	74600314	74799788	-0.269704	-0.766785	0.497081	2.69773	42.476	1.06981e-08	1.31135e-07	FALSE
chr16	46799544	47000127	-0.47709	-0.0344994	-0.44259	3.01888	42.4425	1.08111e-08	1.32382e-07	TRUE
chr1	30800072	31000251	0.0300925	0.546877	-0.516785	2.54736	42.3718	1.10536e-08	1.35157e-07	FALSE
chr6	15399088	15600316	0.335904	0.889304	-0.5534	2.58157	42.533	1.10607e-08	1.35157e-07	FALSE
chr14	76600025	76799520	-0.775825	-0.45745	-0.318374	4.27106	42.2473	1.14942e-08	1.40308e-07	TRUE
chr7	37000224	37199682	-0.241651	-0.666308	0.424658	3.16105	42.1958	1.16817e-08	1.42368e-07	FALSE
chr15	59800441	60000085	-1.44186	-1.0781	-0.363767	4.04292	42.1943	1.16872e-08	1.42368e-07	TRUE
chr14	77000319	77199743	-0.219079	0.118247	-0.337327	3.99977	42.1899	1.17034e-08	1.42418e-07	TRUE
chr3	31200117	31399270	-0.289343	0.132453	-0.421796	3.16872	42.1837	1.17263e-08	1.42549e-07	TRUE
chr14	87399975	87600100	-0.580673	-1.0568	0.476123	2.87974	42.1617	1.18078e-08	1.43391e-07	FALSE
chr4	140399870	140599901	0.744257	0.39575	0.348506	4.07405	42.3099	1.18582e-08	1.43854e-07	TRUE
chr3	138600225	138800240	1.22087	0.886757	0.334109	4.1778	42.1055	1.20183e-08	1.45645e-07	TRUE
chr2	8200126	8400667	-0.125317	-0.657807	0.53249	2.4513	42.0877	1.20859e-08	1.46314e-07	FALSE
chr11	45199964	45400222	-0.445004	-0.0306754	-0.414329	3.25453	42.0383	1.22752e-08	1.48453e-07	TRUE
chr10	50599618	50799930	0.47207	1.05932	-0.587251	2.19793	41.9713	1.25371e-08	1.51464e-07	FALSE
chr18	9800129	10000533	0.616302	0.198863	0.417438	3.3131	41.917	1.27535e-08	1.5392e-07	TRUE
chr12	16000038	16199983	-1.02371	-0.704184	-0.319528	4.26443	41.908	1.27894e-08	1.54195e-07	TRUE
chr10	46200044	46399996	-0.227442	0.295655	-0.523097	2.49949	41.8803	1.29019e-08	1.55392e-07	FALSE
chr2	102399971	102599896	-1.22947	-0.933821	-0.295648	4.60189	41.8345	1.30894e-08	1.57488e-07	TRUE
chr1	175399918	175600004	0.9167	0.504435	0.412265	3.4215	41.8155	1.31684e-08	1.58277e-07	TRUE
chr13	52400059	52599661	-0.317645	-0.604268	0.286623	4.60654	41.8073	1.32021e-08	1.5852e-07	FALSE
chr9	97200216	97399700	0.481023	0.976192	-0.49517	2.8016	41.7947	1.32551e-08	1.58993e-07	FALSE
chr6	47200126	47400058	2.33642	2.87871	-0.542296	3.4314	41.7776	1.33265e-08	1.59687e-07	FALSE
chr7	16599937	16800410	-0.119041	-0.418473	0.299432	4.35283	41.7654	1.33782e-08	1.60143e-07	FALSE
chr8	112000187	112200240	-0.647907	-0.233714	-0.414193	3.28896	41.7567	1.34148e-08	1.60418e-07	TRUE
chr3	80999877	81199748	0.515315	0.964446	-0.449131	3.27447	41.7528	1.34313e-08	1.60451e-07	FALSE
chr11	73399917	73600170	0.347555	0.832735	-0.48518	2.73595	41.7475	1.34537e-08	1.60556e-07	FALSE
chr17	46200086	46400055	-0.400109	-0.113491	-0.286618	4.56205	41.6456	1.38939e-08	1.65641e-07	TRUE
chr9	89400381	89599722	0.727933	0.215076	0.512857	2.5816	41.6334	1.39476e-08	1.66066e-07	TRUE
chr4	122799987	122999947	1.82287	2.29104	-0.468177	3.53384	41.6311	1.39578e-08	1.66066e-07	FALSE
chr1	159999983	160199909	-0.665369	-1.01123	0.345866	4.12581	41.7766	1.4013e-08	1.66553e-07	FALSE
chr19	35800065	35999501	-0.125134	-0.575001	0.449867	2.90452	41.6082	1.4059e-08	1.66931e-07	FALSE
chr1	97999874	98199770	-0.8461	-1.36558	0.519477	2.71631	41.5344	1.43911e-08	1.70702e-07	FALSE
chr11	11000041	11200099	0.0164133	-0.445888	0.462302	2.82458	41.5254	1.44324e-08	1.71019e-07	FALSE
chr3	53600056	53800301	0.106245	0.569879	-0.463633	2.81087	41.3987	1.50232e-08	1.7784e-07	FALSE
chr14	32399951	32599894	-0.167688	0.226422	-0.39411	3.49199	41.376	1.51314e-08	1.7894e-07	FALSE
chr19	11400226	11600017	-0.35576	-0.789662	0.433902	3.27998	41.3414	1.52984e-08	1.80733e-07	FALSE
chr9	22399944	22599919	-0.618952	-0.239816	-0.379136	3.66906	41.3347	1.53306e-08	1.80932e-07	TRUE
chr11	118400674	118600042	-0.797923	-0.474905	-0.323018	4.15321	41.3305	1.53513e-08	1.80994e-07	TRUE
chr18	7999734	8200193	-0.14841	0.32388	-0.47229	2.73074	41.307	1.54661e-08	1.82165e-07	FALSE
chr10	30399897	30600831	0.639635	0.222629	0.417006	3.2356	41.2561	1.57174e-08	1.8494e-07	TRUE
chr7	118000304	118200365	0.172578	0.517866	-0.345288	3.92335	41.2462	1.5767e-08	1.85338e-07	FALSE
chr17	37399849	37599874	-0.0440194	0.460341	-0.50436	2.57591	41.2313	1.5842e-08	1.86032e-07	FALSE
chr2	10600519	10799994	0.00817881	0.42467	-0.416491	3.2253	41.1951	1.60247e-08	1.87991e-07	FALSE
chr18	31399991	31600428	0.749151	0.330116	0.419035	3.09872	41.1904	1.60487e-08	1.88084e-07	TRUE
chr13	15400113	15599817	0.107464	-0.332947	0.440411	2.94957	41.1825	1.6089e-08	1.88368e-07	FALSE
chr8	18399857	18599899	0.807584	0.389765	0.417819	3.3112	41.177	1.61173e-08	1.88512e-07	TRUE
chr1	164399704	164599272	0.191883	0.536664	-0.344781	3.90258	41.0931	1.65527e-08	1.93412e-07	FALSE
chr5	96999977	97199739	-1.05086	-0.661584	-0.389277	3.63605	41.0809	1.6617e-08	1.9397e-07	TRUE
chr2	153799737	154000264	-1.00792	-0.640846	-0.367074	3.78693	41.048	1.67912e-08	1.95809e-07	TRUE
chr1	16000137	16200714	-0.020036	0.388465	-0.408501	3.4469	41.0174	1.69558e-08	1.97532e-07	FALSE
chr15	5200337	5400009	2.01682	2.44294	-0.426114	3.90328	41.0067	1.70133e-08	1.98005e-07	FALSE
chr1	193200071	193399988	-1.05829	-0.749095	-0.309199	4.40198	41.001	1.7044e-08	1.98166e-07	TRUE
chr7	116599780	116800384	-0.0591282	0.358401	-0.417529	3.21425	40.9835	1.71394e-08	1.99079e-07	FALSE
chr8	103800299	104000043	0.127504	-0.284647	0.412151	3.19734	40.9776	1.71718e-08	1.99257e-07	FALSE
chr7	16200918	16400056	0.30675	0.603758	-0.297008	4.42149	40.9582	1.7278e-08	2.00292e-07	FALSE
chr1	23199816	23400184	0.0554674	0.529688	-0.474221	2.7344	40.9488	1.73298e-08	2.00694e-07	FALSE
chr4	56399930	56600031	-0.209486	-0.612437	0.402951	3.42468	40.9411	1.73721e-08	2.00986e-07	FALSE
chr8	53399964	53600082	0.482193	1.00691	-0.524714	2.50478	40.9313	1.74265e-08	2.01416e-07	FALSE
chr4	153400049	153600391	-0.118544	-0.493251	0.374708	3.67998	40.9145	1.75197e-08	2.02294e-07	FALSE
chr19	43600131	43800074	0.54339	0.200604	0.342786	3.90173	40.8585	1.78352e-08	2.05735e-07	TRUE
chr8	112399439	112600023	0.228047	0.700764	-0.472717	2.82622	40.8303	1.79959e-08	2.07385e-07	FALSE
chr8	119400123	119599985	1.65152	2.00668	-0.355153	4.28041	40.8124	1.80989e-08	2.08368e-07	FALSE
chr17	63599904	63800034	-0.173471	0.276016	-0.449488	2.8802	40.7783	1.82968e-08	2.1044e-07	FALSE
chr6	89000358	89200354	-0.466763	-0.132231	-0.334532	3.9775	40.6957	1.87846e-08	2.15839e-07	TRUE
chr2	179400180	179599524	-0.423838	-0.830051	0.406212	3.38802	40.68	1.88794e-08	2.16717e-07	FALSE
chr13	81000179	81200038	-0.203948	0.211924	-0.415872	3.11112	40.6599	1.90005e-08	2.17893e-07	FALSE
chr12	9399781	9600149	0.0462174	0.506109	-0.459892	2.86298	40.6163	1.92666e-08	2.2073e-07	FALSE
chr3	147199961	147399840	0.0210337	0.535781	-0.514748	2.46344	40.5859	1.94546e-08	2.22667e-07	FALSE
chr3	144799703	144999944	0.44411	0.965903	-0.521793	2.4931	40.5712	1.95461e-08	2.23496e-07	FALSE
chr14	11200146	11400325	0.297695	-0.147373	0.445068	2.99781	40.5571	1.96343e-08	2.24286e-07	TRUE
chr10	96799818	97000020	-1.88543	-1.53518	-0.350251	4.24472	40.4573	2.02709e-08	2.31333e-07	TRUE
chr3	120800207	121000176	-0.220681	-0.773253	0.552573	2.24935	40.4541	2.02914e-08	2.31342e-07	FALSE
chr12	101200535	101399942	0.643786	1.19628	-0.55249	2.351	40.4421	2.03693e-08	2.32005e-07	FALSE
chr2	51800005	51999736	0.899499	0.477663	0.421836	3.30359	40.4222	2.04997e-08	2.33263e-07	TRUE
chr8	11799875	12000165	-0.0679773	0.256496	-0.324473	4.06574	40.4188	2.05217e-08	2.33288e-07	FALSE
chr17	70600035	70799773	1.33271	1.76068	-0.42797	3.53989	40.4148	2.05479e-08	2.3336e-07	FALSE
chr10	94000017	94200139	-0.769786	-0.476305	-0.293481	4.46123	40.3694	2.08487e-08	2.36547e-07	TRUE
chr13	78000238	78199927	-0.663004	-1.15822	0.495213	2.71103	40.3269	2.11343e-08	2.39556e-07	FALSE
chr3	146799908	147000003	-1.88953	-2.34164	0.452109	3.62018	40.2779	2.14686e-08	2.4311e-07	FALSE
chr9	104200022	104399965	-0.854042	-0.460005	-0.394038	3.46165	40.2439	2.1704e-08	2.45539e-07	TRUE
chr2	7000028	7200087	-0.925929	-0.549648	-0.376281	3.66241	40.2398	2.17324e-08	2.45625e-07	TRUE
chr3	123199913	123399755	-1.27692	-1.72566	0.448739	3.29953	40.2047	2.19779e-08	2.4816e-07	FALSE
chr15	36999831	37200373	-0.500921	-0.164499	-0.336421	4.15843	41.1765	2.20529e-08	2.48767e-07	TRUE
chr2	70400822	70600559	-0.761504	-1.19429	0.432787	3.07645	40.1575	2.23133e-08	2.51464e-07	FALSE
chr15	64799934	64999997	0.166151	0.62662	-0.460469	2.80829	40.132	2.24964e-08	2.53284e-07	FALSE
chr13	74599969	74800215	-0.566192	-0.155645	-0.410547	3.27431	40.0495	2.30995e-08	2.59825e-07	TRUE
chr8	106600105	106799878	0.610637	0.290191	0.320446	4.14972	40.0056	2.34274e-08	2.63261e-07	TRUE
chr3	34200127	34399954	-0.0671747	0.342332	-0.409506	3.30885	39.9904	2.35423e-08	2.64299e-07	FALSE
chr9	58599589	58800220	-0.767201	-0.391581	-0.37562	3.66251	39.9838	2.35926e-08	2.64611e-07	TRUE
chr7	138799950	139000054	0.896536	1.32512	-0.428582	3.34768	39.9277	2.40213e-08	2.69162e-07	FALSE
chr11	52599411	52799975	0.516762	0.898111	-0.381349	3.64837	39.8827	2.43712e-08	2.72823e-07	FALSE
chr14	59999991	60200022	0.403103	0.0271046	0.375999	3.66515	39.8517	2.46154e-08	2.75293e-07	TRUE
chr16	34999818	35199844	0.215463	0.571887	-0.356424	3.80368	39.8096	2.4951e-08	2.78781e-07	FALSE
chr9	51800001	52000225	-0.799665	-1.14974	0.350079	4.02319	39.7271	2.5623e-08	2.86018e-07	FALSE
chr16	11999631	12200243	-0.35927	-0.000901976	-0.358368	3.71923	39.7122	2.57456e-08	2.87114e-07	TRUE
chr11	17599851	17799777	-0.135409	0.275371	-0.41078	3.09639	39.6865	2.59602e-08	2.89232e-07	FALSE
chr1	183800187	183998876	1.40154	1.09752	0.304028	4.5355	39.6718	2.60833e-08	2.90328e-07	TRUE
chr12	34999954	35199936	-1.41627	-1.02374	-0.392527	3.65775	39.602	2.66769e-08	2.96654e-07	TRUE
chr3	90600468	90799455	-2.4864	-3.05365	0.567257	3.28214	39.5587	2.70517e-08	3.00538e-07	FALSE
chr18	65599561	65799627	-0.0656628	-0.390258	0.324595	4.018	39.428	2.82174e-08	3.13191e-07	FALSE
chr4	21200070	21399949	0.0209567	-0.513042	0.533999	2.30805	39.4135	2.83499e-08	3.14366e-07	FALSE
chr10	115400016	115600045	-0.456614	-0.0503268	-0.406287	3.18692	39.3558	2.88832e-08	3.19977e-07	TRUE
chr1	120800150	120999960	-0.506428	-0.046859	-0.459569	2.81224	39.3396	2.90348e-08	3.21353e-07	TRUE
chr11	56999776	57200096	-0.383467	-0.789303	0.405836	3.34682	39.3218	2.92028e-08	3.22908e-07	FALSE
chr5	25999734	26200201	0.917694	1.47669	-0.558999	2.42401	39.2462	2.99257e-08	3.3059e-07	FALSE
chr7	48599877	48800028	2.03613	1.59506	0.44107	3.5048	39.2265	3.01167e-08	3.32388e-07	TRUE
chr6	113600406	113800034	-1.88276	-1.54114	-0.341625	4.21494	39.2114	3.02644e-08	3.33704e-07	TRUE
chr2	16999983	17200266	0.295913	-0.0929985	0.388911	3.39957	39.1996	3.03802e-08	3.34666e-07	TRUE
chr14	121799497	121999874	1.28049	0.96538	0.31511	4.35265	39.1958	3.04173e-08	3.34761e-07	TRUE
chr6	88400394	88600616	-0.803653	-0.511776	-0.291877	4.39753	39.1907	3.04683e-08	3.35009e-07	TRUE
chr1	117999993	118200029	0.616903	0.0544511	0.562452	2.10897	39.1638	3.07344e-08	3.37619e-07	TRUE
chr5	102599926	102799907	-0.351154	-0.780451	0.429297	3.17595	39.1043	3.1333e-08	3.43872e-07	FALSE
chr2	68400374	68600168	-0.0426266	0.354964	-0.397591	3.4268	39.0248	3.21503e-08	3.52513e-07	FALSE
chr7	27199771	27399998	0.912527	1.2429	-0.330369	4.11412	38.9815	3.26056e-08	3.57171e-07	FALSE
chr9	114800119	114999890	-0.701859	-0.384138	-0.317721	4.07408	38.9698	3.27291e-08	3.5819e-07	TRUE
chr15	56200172	56400022	-0.0212654	0.467725	-0.488991	2.55286	38.9457	3.29863e-08	3.60668e-07	FALSE
chr4	58599930	58799841	0.0213474	-0.381889	0.403236	3.12007	38.929	3.31655e-08	3.62078e-07	FALSE
chr2	73799956	73999617	-0.238571	0.189187	-0.427758	2.97689	38.9279	3.31769e-08	3.62078e-07	TRUE
chr2	13200156	13399526	0.996701	0.682796	0.313905	4.17642	38.908	3.3392e-08	3.64088e-07	TRUE
chr12	113600020	113800141	-1.18955	-0.755809	-0.433736	3.10147	38.898	3.35012e-08	3.64939e-07	TRUE
chr15	9199908	9399769	-0.0403363	0.403125	-0.443461	2.89677	38.8841	3.36522e-08	3.66244e-07	FALSE
chr2	3599744	3800055	-1.13117	-0.774658	-0.356514	3.88662	38.8436	3.4098e-08	3.70752e-07	TRUE
chr6	84600141	84800077	-0.00855404	-0.399198	0.390644	3.39061	38.8036	3.45437e-08	3.75232e-07	FALSE
chr11	42999784	43200478	0.139328	-0.293287	0.432616	2.90726	38.8009	3.45739e-08	3.75232e-07	FALSE
chr8	89000167	89200040	0.229721	0.634726	-0.405005	3.17756	38.7306	3.53732e-08	3.83553e-07	FALSE
chr1	159800086	159999986	0.663901	0.263643	0.400258	3.9444	43.7143	3.54586e-08	3.84124e-07	TRUE
chr1	10999980	11200274	0.081104	-0.410391	0.491495	2.53664	38.675	3.60191e-08	3.89836e-07	FALSE
chr13	106600004	106800905	0.898118	0.453583	0.444535	2.90021	38.6622	3.61699e-08	3.91107e-07	TRUE
chr11	112799931	113000012	-0.0824938	-0.461849	0.379355	3.51177	38.6589	3.62088e-08	3.91168e-07	FALSE
chr10	38799742	38999985	0.694057	0.268209	0.425848	3.10616	38.623	3.66343e-08	3.95402e-07	TRUE
chr8	126800415	126999933	-3.03603	-2.63838	-0.397654	4.58602	38.7034	3.69151e-08	3.98067e-07	TRUE
chr12	41800133	42000304	-0.300119	-0.78121	0.481091	2.66933	38.5736	3.72289e-08	4.01082e-07	FALSE
chr8	24200072	24400032	-0.288025	-0.697268	0.409242	3.05805	38.5482	3.7538e-08	4.04041e-07	FALSE
chr4	104799994	104999909	-0.040134	0.34715	-0.387284	3.34814	38.536	3.76872e-08	4.05275e-07	FALSE
chr16	20199999	20400147	0.495296	0.805677	-0.310381	4.13564	38.4694	3.85139e-08	4.13787e-07	FALSE
chr12	32800992	32999729	0.291249	-0.0107748	0.302023	4.20076	38.4593	3.86412e-08	4.14775e-07	TRUE
chr1	190400281	190599793	-0.320394	-0.733497	0.413103	3.04987	38.3966	3.944e-08	4.22744e-07	FALSE
chr14	74400163	74600071	0.073649	-0.381014	0.454663	2.77088	38.3954	3.94556e-08	4.22744e-07	FALSE
chr2	24999736	25199978	0.546865	0.832553	-0.285688	4.46511	38.354	3.99925e-08	4.28106e-07	FALSE
chr17	83199463	83400150	2.06482	1.72429	0.340531	4.30472	38.3278	4.03356e-08	4.31036e-07	TRUE
chr10	62199976	62400355	0.695626	0.377928	0.317698	4.0548	38.3275	4.03397e-08	4.31036e-07	TRUE
chr12	26799665	27000078	0.313906	0.723806	-0.4099	3.08898	38.2791	4.09824e-08	4.37506e-07	FALSE
chr15	95200054	95400275	-0.0975708	-0.52874	0.431169	2.92803	38.271	4.10913e-08	4.3827e-07	FALSE
chr12	76999658	77199891	0.810548	1.12111	-0.310558	4.30493	38.2552	4.13038e-08	4.40136e-07	FALSE
chr1	184799965	185000063	-0.0679613	-0.449322	0.381361	3.45438	38.235	4.15779e-08	4.42656e-07	FALSE
chr9	48800390	48999623	-0.323542	-0.674301	0.350759	4.02937	39.4392	4.1672e-08	4.43255e-07	FALSE
chr6	70599884	70799850	0.700651	0.287273	0.413377	3.04485	38.2119	4.18929e-08	4.45202e-07	TRUE
chr18	13200109	13400101	-0.259434	0.13194	-0.391374	3.31702	38.1777	4.23636e-08	4.49797e-07	TRUE
chr13	106199886	106399992	0.0287573	-0.47828	0.507037	2.53417	38.131	4.30157e-08	4.56308e-07	FALSE
chr19	21199927	21399808	-0.487423	-0.858515	0.371092	3.7469	38.1149	4.32431e-08	4.58307e-07	FALSE
chr3	57799778	57999905	0.159907	0.564567	-0.404661	3.15726	38.0831	4.36953e-08	4.62681e-07	FALSE
chr5	139800005	139999955	1.87525	1.58433	0.290922	4.85298	38.061	4.40128e-08	4.65623e-07	TRUE
chr11	26800662	26999893	-0.224156	-0.678124	0.453968	2.76768	38.0559	4.40863e-08	4.65982e-07	FALSE
chr11	52200024	52400983	-2.61678	-2.22784	-0.388946	4.2162	38.0359	4.43766e-08	4.68628e-07	TRUE
chr7	29400125	29599966	-1.38255	-1.04744	-0.335109	4.11048	38.0298	4.44642e-08	4.69131e-07	TRUE
chr6	120600488	120799780	-0.384564	-0.670815	0.286251	4.42449	38.0131	4.47087e-08	4.71287e-07	FALSE
chr14	19000091	19200232	-1.00657	-1.59098	0.584402	2.29751	37.975	4.52702e-08	4.76778e-07	FALSE
chr2	100199760	100399931	-0.870044	-0.295589	-0.574455	2.04008	37.9639	4.54358e-08	4.78094e-07	TRUE
chr14	122999624	123200568	-1.11079	-0.690014	-0.420778	3.06405	37.9094	4.62547e-08	4.86275e-07	TRUE
chr4	147800225	148000814	2.15103	2.65049	-0.499461	3.36355	37.8223	4.75948e-08	4.99915e-07	FALSE
chr18	46400201	46600032	0.219715	-0.125126	0.344841	3.75076	37.802	4.79126e-08	5.02804e-07	TRUE
chr5	19000147	19199786	0.20746	-0.293907	0.501367	2.40242	37.7857	4.81708e-08	5.05062e-07	FALSE
chr13	11600054	11800087	-0.126953	-0.54763	0.420677	2.96088	37.7304	4.90531e-08	5.13854e-07	FALSE
chr16	29200009	29399919	-0.560678	-1.00619	0.445511	2.90557	37.7273	4.91025e-08	5.13913e-07	FALSE
chr11	29800151	30000152	-0.153461	0.231804	-0.385265	3.422	37.7204	4.92141e-08	5.14623e-07	FALSE
chr15	51600284	51799716	0.832636	0.437635	0.395001	3.33768	37.7175	4.92611e-08	5.14655e-07	TRUE
chr2	71200006	71400045	0.450247	0.733611	-0.283363	4.44512	37.705	4.94643e-08	5.1632e-07	FALSE
chr15	42399969	42599916	-0.364471	-0.782416	0.417945	3.34176	37.7019	4.95146e-08	5.16385e-07	FALSE
chr3	57600043	57799781	1.13027	1.62366	-0.49339	2.8235	37.6932	4.96564e-08	5.17405e-07	FALSE
chr5	44400253	44600142	-0.203517	0.201889	-0.405405	3.21705	37.682	4.984e-08	5.18857e-07	TRUE
chr3	38799959	39000086	-0.56361	-0.954192	0.390581	3.58245	37.6737	4.9976e-08	5.19812e-07	FALSE
chr17	82599779	82800047	-0.395475	-0.923332	0.527857	2.30158	37.6709	5.00225e-08	5.19835e-07	FALSE
chr14	70800042	71000329	0.914974	1.21089	-0.295918	4.45372	37.6422	5.04966e-08	5.24298e-07	FALSE
chr8	21799496	22000094	0.848064	0.344758	0.503306	2.4661	37.5854	5.14488e-08	5.33713e-07	TRUE
chr10	69999831	70199847	0.077833	-0.318781	0.396614	3.09652	37.5235	5.25062e-08	5.44201e-07	FALSE
chr8	83000032	83199964	-0.48057	-0.0834112	-0.397159	3.27084	37.5086	5.27658e-08	5.4641e-07	TRUE
chr10	8200097	8399513	-1.76706	-1.40693	-0.360132	3.97047	37.4943	5.30146e-08	5.48503e-07	TRUE
chr6	144400044	144599965	0.617611	0.283707	0.333904	3.88629	37.3251	5.60541e-08	5.7944e-07	TRUE
chr9	70200488	70400487	-0.270533	0.0219775	-0.29251	4.25445	37.2957	5.66016e-08	5.84584e-07	TRUE
chr5	138200770	138400209	-0.0919195	0.274711	-0.36663	3.55161	37.2888	5.6731e-08	5.85192e-07	FALSE
chr9	52799710	52999634	0.0512991	-0.401697	0.452996	2.73278	37.2872	5.67601e-08	5.85192e-07	FALSE
chr8	69000507	69199769	0.44743	0.0801355	0.367295	3.53414	37.2701	5.70822e-08	5.87258e-07	TRUE
chr1	132799765	133000042	0.16588	-0.185502	0.351382	3.67218	37.2686	5.71087e-08	5.87258e-07	FALSE
chr14	100800293	101000216	-0.0469579	-0.538743	0.491785	2.55736	37.2685	5.71105e-08	5.87258e-07	FALSE
chr15	72200023	72399983	-0.0291749	-0.422517	0.393342	3.29692	37.2177	5.80767e-08	5.96671e-07	FALSE
chr2	103399952	103600369	1.89911	1.57012	0.328993	4.327	37.1872	5.86663e-08	6.02201e-07	TRUE
chr15	88800373	89000765	0.453926	0.806405	-0.35248	3.79757	37.1789	5.8826e-08	6.03313e-07	FALSE
chr9	75399923	75599974	-1.54953	-1.1647	-0.384832	3.6751	37.133	5.97256e-08	6.12005e-07	TRUE
chr12	100199726	100399996	0.526674	0.238838	0.287836	4.3154	37.1267	5.98491e-08	6.12736e-07	TRUE
chr3	152600093	152799549	0.206119	0.540361	-0.334242	3.91909	37.0898	6.05855e-08	6.19734e-07	FALSE
chr9	20000524	20199889	-0.315015	-0.861215	0.5462	2.24831	37.0772	6.08365e-08	6.2137e-07	FALSE
chr17	65199916	65400108	-0.372443	-0.857576	0.485133	2.5773	37.0765	6.08512e-08	6.2137e-07	FALSE
chr6	3600302	3799742	0.604431	1.15115	-0.546722	2.31217	37.0256	6.18844e-08	6.31372e-07	FALSE
chr10	42600177	42799271	-0.579815	-0.861087	0.281272	4.51212	36.9991	6.24296e-08	6.3638e-07	FALSE
chr7	16800407	16999847	-1.38391	-1.70859	0.324679	4.26056	36.9721	6.29909e-08	6.41546e-07	FALSE
chr14	40599912	40799953	0.347558	-0.122875	0.470432	2.60336	36.9608	6.32275e-08	6.4316e-07	TRUE
chr11	118800081	118999993	0.45917	0.119781	0.339389	3.79261	36.9571	6.33038e-08	6.4316e-07	TRUE
chr5	35200056	35399838	0.645648	0.281973	0.363676	3.63743	36.9566	6.33137e-08	6.4316e-07	TRUE
chr5	97999922	98200021	-1.86353	-2.33327	0.469735	3.33869	36.9239	6.40039e-08	6.4961e-07	FALSE
chr6	83799869	83999956	-0.931856	-0.557942	-0.373914	3.64017	36.9206	6.40734e-08	6.49753e-07	TRUE
chr2	151399014	151599312	1.56849	1.1495	0.418996	3.39211	36.8653	6.52585e-08	6.612e-07	TRUE
chr8	111599892	111800019	-1.31486	-1.62302	0.308156	4.36128	36.7979	6.67328e-08	6.75275e-07	FALSE
chr9	4200115	4400112	-0.284492	-0.773031	0.488538	2.55985	36.795	6.67975e-08	6.75275e-07	FALSE
chr2	150399977	150600063	1.23539	0.823645	0.411741	3.20755	36.794	6.68202e-08	6.75275e-07	TRUE
chr9	39800056	40000140	-0.119867	-0.622651	0.502784	2.39879	36.7565	6.76554e-08	6.83128e-07	FALSE
chr4	109799829	110000321	-1.3339	-1.78789	0.453984	3.03637	36.751	6.77802e-08	6.838e-07	FALSE
chr14	8200971	8400064	-0.968758	-0.587732	-0.381026	3.46295	36.7172	6.85449e-08	6.90818e-07	TRUE
chr12	12000595	12200071	1.29117	0.896387	0.394781	3.51566	36.715	6.85935e-08	6.90818e-07	TRUE
chr3	10599989	10800336	0.195811	0.718949	-0.523137	2.26178	36.6884	6.92028e-08	6.96357e-07	FALSE
chr14	32200005	32399954	-0.535924	-0.171345	-0.364579	3.5371	36.668	6.96737e-08	7.00495e-07	TRUE
chr14	101000213	101200425	-0.036037	-0.517614	0.481577	2.53605	36.5985	7.12994e-08	7.16227e-07	FALSE
chr12	112399806	112599958	-0.354808	-0.641682	0.286874	4.36189	36.5648	7.21043e-08	7.23693e-07	FALSE
chr9	116600117	116800035	0.164017	0.553542	-0.389525	3.21021	36.5419	7.26538e-08	7.28586e-07	FALSE
chr14	122799575	122999627	-1.1226	-1.49443	0.37183	3.74466	36.5253	7.30576e-08	7.3201e-07	FALSE
chr6	54399978	54600090	0.795114	0.453999	0.341115	3.86236	36.4709	7.43912e-08	7.44736e-07	TRUE
chr1	94000096	94200038	-1.42825	-0.937219	-0.491032	2.69154	36.4138	7.58196e-08	7.58389e-07	TRUE
chr4	135599849	135800065	-0.32219	-0.600947	0.278757	4.41242	36.4008	7.61479e-08	7.61025e-07	FALSE
chr17	55800030	56000105	1.71643	1.30985	0.406573	3.588	36.3917	7.63797e-08	7.62693e-07	TRUE
chr9	3600065	3799924	0.463881	0.973399	-0.509518	2.51332	36.378	7.67271e-08	7.6551e-07	FALSE
chr9	92800103	93000042	-0.21722	0.216766	-0.433987	2.81911	36.3723	7.68731e-08	7.66317e-07	TRUE
chr7	56000130	56199437	-0.554515	-0.995009	0.440494	2.83992	36.3254	7.80839e-08	7.77727e-07	FALSE
chr1	11200271	11400577	0.235455	-0.241052	0.476507	2.53245	36.3203	7.82174e-08	7.78395e-07	FALSE
chr3	34000030	34200130	-0.279261	0.111438	-0.390699	3.08683	36.2848	7.91489e-08	7.86999e-07	TRUE
chr13	10000040	10199986	-0.382005	-0.765893	0.383888	3.40707	36.2594	7.98203e-08	7.93003e-07	FALSE
chr13	31200073	31399805	-0.163233	0.197631	-0.360864	3.58043	36.2138	8.10446e-08	8.04486e-07	FALSE
chr10	69200007	69400136	0.339861	-0.0478009	0.387662	3.13646	36.1001	8.41815e-08	8.34919e-07	TRUE
chr18	32399971	32599813	-0.158889	0.160224	-0.319113	4.00794	36.0968	8.42722e-08	8.35112e-07	FALSE
chr9	42400046	42600177	-0.49486	-0.184813	-0.310047	4.04518	36.0924	8.43959e-08	8.35633e-07	TRUE
chr1	171800038	172000017	0.0275332	0.329409	-0.301876	4.08142	36.0763	8.48535e-08	8.39456e-07	FALSE
chr8	24400029	24600409	-0.418449	-0.0226193	-0.39583	3.18327	36.0507	8.55816e-08	8.45606e-07	TRUE
chr15	9000620	9199911	0.0347239	0.4747	-0.439976	2.81362	36.0476	8.56711e-08	8.45606e-07	FALSE
chr1	172599809	172800273	-0.8975	-0.497941	-0.399559	3.07324	36.0469	8.56911e-08	8.45606e-07	TRUE
chr7	5999989	6199869	1.3023	0.880495	0.421801	3.07635	36.0366	8.59855e-08	8.47798e-07	TRUE
chr5	45799676	46000173	-0.988434	-0.551614	-0.436819	2.96563	36.0164	8.65688e-08	8.52833e-07	TRUE
chr3	116800024	116999753	-1.55152	-1.96649	0.41497	3.51083	35.9825	8.75541e-08	8.61817e-07	FALSE
chr5	28999998	29199790	-0.458617	-0.880702	0.422085	2.91654	35.9484	8.85609e-08	8.70997e-07	FALSE
chr19	39199985	39400537	-0.137238	0.33395	-0.471189	2.54179	35.8737	9.08021e-08	8.92292e-07	FALSE
chr4	137799954	137999873	0.666874	0.364618	0.302256	4.09242	35.8267	9.22428e-08	9.05692e-07	TRUE
chr12	39200012	39399965	0.0574469	-0.413453	0.4709	2.63381	35.8159	9.25756e-08	9.082e-07	FALSE
chr5	90200029	90399997	0.482107	0.961105	-0.478998	2.67229	35.8064	9.28713e-08	9.10341e-07	FALSE
chr1	130199959	130399967	-0.445219	-0.945307	0.500087	2.41678	35.7854	9.35279e-08	9.16012e-07	FALSE
chr2	37400472	37599867	1.32045	1.72239	-0.401934	3.62974	35.7753	9.38456e-08	9.18357e-07	FALSE
chr4	139400153	139600001	-0.188192	0.0966208	-0.284813	4.27236	35.7632	9.42272e-08	9.21324e-07	TRUE
chr8	119998794	120200020	-0.435186	-0.174953	-0.260233	4.79937	35.6714	9.71706e-08	9.49313e-07	TRUE
chr3	53000176	53199920	-0.397637	-0.0243954	-0.373242	3.41903	35.6644	9.73996e-08	9.50759e-07	TRUE
chr4	6799736	6999832	0.971557	1.27711	-0.305555	4.20497	35.6295	9.85486e-08	9.61177e-07	FALSE
chr15	6800026	7000230	0.177765	0.543127	-0.365362	3.4832	35.6079	9.92654e-08	9.67364e-07	FALSE
chr16	42599736	42799262	0.227049	-0.163143	0.390193	3.06761	35.5627	1.00783e-07	9.8134e-07	TRUE
chr12	59400000	59599981	-0.14308	0.331399	-0.474479	2.55916	35.5529	1.01116e-07	9.83769e-07	FALSE
chr7	25999990	26199994	0.524407	1.07609	-0.551685	2.1917	35.5362	1.01686e-07	9.88488e-07	FALSE
chr14	101999895	102200284	-0.00122511	0.485184	-0.48641	2.40647	35.4208	1.05706e-07	1.02672e-06	FALSE
chr16	62400034	62599762	0.522489	0.0598213	0.462667	2.59176	35.3779	1.07243e-07	1.04078e-06	TRUE
chr19	48199875	48400100	0.401926	0.787693	-0.385767	3.2488	35.3536	1.08125e-07	1.04848e-06	FALSE
chr15	101800053	101999953	-0.144746	-0.45559	0.310844	4.04281	35.311	1.09687e-07	1.06276e-06	FALSE
chr12	28999792	29199661	-0.271448	0.0584915	-0.32994	3.81082	35.2118	1.13417e-07	1.09798e-06	TRUE
chr8	122200241	122399670	1.28335	0.997715	0.285636	4.62616	35.3172	1.1383e-07	1.10025e-06	TRUE
chr6	51799969	51999177	-0.523318	-0.233617	-0.289701	4.17088	35.2008	1.13838e-07	1.10025e-06	TRUE
chr2	77999929	78200170	0.315693	0.774282	-0.458589	2.70036	35.1861	1.14402e-07	1.10479e-06	FALSE
chr3	5199979	5400031	0.203285	0.663803	-0.460518	2.75283	35.1084	1.17441e-07	1.13321e-06	FALSE
chr12	88799601	88999959	-0.0288371	-0.428808	0.399971	3.08799	35.0597	1.19389e-07	1.15105e-06	FALSE
chr7	140599842	140800218	-0.599391	-0.958539	0.359148	3.65259	35.052	1.197e-07	1.15311e-06	FALSE
chr12	20600006	20800171	1.28801	0.727066	0.560944	2.10198	35.0105	1.21389e-07	1.16842e-06	TRUE
chr8	77600073	77800037	-0.462497	-0.0976939	-0.364803	3.41671	34.9829	1.22525e-07	1.17839e-06	TRUE
chr1	181000032	181199993	-0.658752	-0.380133	-0.278619	4.3717	34.9614	1.23418e-07	1.18601e-06	TRUE
chr9	110399967	110599794	0.604002	0.880618	-0.276616	4.4464	34.9404	1.24298e-07	1.19349e-06	FALSE
chr3	85199764	85400095	-0.561922	-0.217673	-0.344249	3.73454	34.8947	1.26235e-07	1.2111e-06	TRUE
chr2	116600091	116799826	0.205435	-0.27267	0.478105	2.51581	34.8577	1.27826e-07	1.22535e-06	FALSE
chr2	83600126	83799961	2.02754	2.56312	-0.535584	2.96699	34.7745	1.31475e-07	1.25925e-06	FALSE
chr2	6800373	7000031	-1.27471	-0.93528	-0.339428	3.91188	34.7722	1.31576e-07	1.25925e-06	TRUE
chr9	93599816	93800704	0.530665	0.105121	0.425544	2.82258	34.7565	1.3228e-07	1.26441e-06	TRUE
chr18	84200154	84399757	-0.187024	-0.516195	0.329171	3.83795	34.7554	1.3233e-07	1.26441e-06	FALSE
chr5	32400447	32599843	-1.02318	-0.692166	-0.331015	3.94152	34.7519	1.32484e-07	1.26485e-06	TRUE
chr14	87199887	87399978	-0.21861	-0.632953	0.414343	2.9168	34.7352	1.33239e-07	1.27005e-06	FALSE
chr16	16599851	16800141	0.067498	-0.32973	0.397228	3.15404	34.735	1.33246e-07	1.27005e-06	FALSE
chr18	20599778	20799447	0.683689	1.11896	-0.435267	2.88621	34.7294	1.33499e-07	1.27144e-06	FALSE
chr8	25999996	26200033	-1.78308	-1.42949	-0.353584	3.9067	34.7199	1.33932e-07	1.27386e-06	TRUE
chr2	168799972	168999273	-0.497661	-0.0935031	-0.404158	3.67038	38.7752	1.33971e-07	1.27386e-06	TRUE
chr1	143399845	143599938	0.297444	-0.184673	0.482117	2.42824	34.6708	1.36176e-07	1.29378e-06	TRUE
chr12	108400483	108600055	1.33999	0.994177	0.345808	3.81212	34.653	1.37e-07	1.30056e-06	TRUE
chr7	34399980	34600075	0.192586	0.557306	-0.36472	3.44947	34.6478	1.37246e-07	1.30184e-06	FALSE
chr17	72600045	72799933	0.59829	0.250704	0.347586	3.60306	34.6046	1.39272e-07	1.31999e-06	TRUE
chr4	3800327	4000058	-0.245315	-0.729323	0.484008	2.49682	34.5999	1.39491e-07	1.321e-06	FALSE
chr1	66400044	66600007	0.574974	0.148934	0.426039	2.79751	34.5399	1.42363e-07	1.34712e-06	TRUE
chr7	133599969	133799931	-0.274822	-0.700234	0.425412	2.96051	34.6487	1.42524e-07	1.34755e-06	FALSE
chr14	23399992	23600964	-0.116419	-0.490839	0.37442	3.33081	34.4972	1.4444e-07	1.36457e-06	FALSE
chr4	55598937	55800030	0.160304	0.4908	-0.330497	3.85131	34.4843	1.45076e-07	1.36947e-06	FALSE
chr17	44199992	44400020	0.982268	0.69097	0.291298	4.20654	34.4595	1.46305e-07	1.37997e-06	TRUE
chr4	135400157	135599852	-0.0611413	0.214772	-0.275913	4.39255	34.4419	1.47181e-07	1.38712e-06	FALSE
chr9	92599943	92800106	-0.186344	0.26576	-0.452104	2.66154	34.4276	1.47896e-07	1.39274e-06	FALSE
chr8	46799944	47000344	-1.98254	-1.63752	-0.34502	4.05464	34.4199	1.48285e-07	1.39528e-06	TRUE
chr16	12599711	12800015	-0.0625792	-0.441371	0.378792	3.24319	34.4128	1.48646e-07	1.39756e-06	FALSE
chr9	46399559	46599854	0.404406	0.793283	-0.388876	3.23436	34.3731	1.50665e-07	1.41541e-06	FALSE
chr8	12400137	12600054	-0.092104	-0.425888	0.333784	3.8248	34.3633	1.51166e-07	1.41717e-06	FALSE
chr6	95000153	95200042	-1.05705	-0.698719	-0.358327	3.60587	34.3631	1.51176e-07	1.41717e-06	TRUE
chr2	33399893	33599776	-0.407572	-0.110837	-0.296735	4.08473	34.3624	1.51215e-07	1.41717e-06	TRUE
chr11	30599966	30799644	0.0740995	-0.282933	0.357033	3.49319	34.3377	1.52491e-07	1.42799e-06	FALSE
chr7	26800245	26999990	-0.621363	-1.12784	0.506479	2.38865	34.2852	1.55238e-07	1.45256e-06	FALSE
chr4	12200084	12400229	-0.43537	-0.00695623	-0.428414	2.76547	34.2667	1.56218e-07	1.46057e-06	TRUE
chr10	119199163	119400048	-1.45532	-1.07709	-0.378223	3.55552	34.2573	1.56722e-07	1.46411e-06	TRUE
chr10	82600049	82799777	2.07321	1.72225	0.350959	4.02776	34.2439	1.57435e-07	1.46944e-06	TRUE
chr18	73599967	73799641	0.0323517	0.338666	-0.306314	3.94866	34.2419	1.57543e-07	1.46944e-06	FALSE
chr1	120599944	120800153	0.000700048	0.372309	-0.371609	3.13606	34.212	1.59156e-07	1.48331e-06	FALSE
chr4	142599864	142800060	-0.247241	0.129362	-0.376603	3.26288	34.2082	1.59364e-07	1.48407e-06	TRUE
chr3	144399988	144599846	-0.0011635	-0.343796	0.342632	3.61241	34.192	1.60247e-07	1.49111e-06	FALSE
chr7	48000055	48199988	-0.0252727	-0.456975	0.431702	2.74046	34.1812	1.60836e-07	1.4954e-06	FALSE
chr5	91399921	91599789	1.03074	0.672384	0.358356	3.57026	34.165	1.61728e-07	1.50179e-06	TRUE
chr3	149599955	149800128	-0.409819	-0.828621	0.418802	2.90783	34.1641	1.61779e-07	1.50179e-06	FALSE
chr12	13799700	13999956	0.0760864	0.527523	-0.451437	2.63754	34.1526	1.62412e-07	1.50648e-06	FALSE
chr7	19400082	19600176	0.022167	-0.258285	0.280452	4.26058	34.1345	1.63417e-07	1.51461e-06	FALSE
chr19	40600295	40799941	0.292601	0.575118	-0.282517	4.20568	34.1249	1.63953e-07	1.51838e-06	FALSE
chr17	48400468	48600093	-0.106268	0.227394	-0.333662	3.70389	34.0277	1.69484e-07	1.56836e-06	FALSE
chr7	44400066	44599823	0.15472	-0.141953	0.296673	4.07589	33.985	1.71973e-07	1.59014e-06	TRUE
chr11	112599865	112799934	-0.0136623	-0.379853	0.36619	3.33017	33.9732	1.72667e-07	1.5953e-06	FALSE
chr3	28600129	28800368	-1.59691	-2.01671	0.419799	3.57623	34.0523	1.74417e-07	1.6102e-06	FALSE
chr13	62599807	62800533	1.52361	1.06957	0.454045	2.91575	33.9392	1.74685e-07	1.61141e-06	TRUE
chr7	40800304	41000012	-0.643454	-0.257547	-0.385907	3.19724	33.9318	1.75123e-07	1.61418e-06	TRUE
chr10	52199978	52400092	0.217956	-0.192642	0.410598	2.86084	33.8551	1.79778e-07	1.65579e-06	TRUE
chr11	119400112	119600250	0.501809	0.752445	-0.250637	4.74305	33.8484	1.80187e-07	1.65826e-06	FALSE
chr13	91600340	91799873	-2.2533	-1.90984	-0.343469	4.24919	33.8414	1.80619e-07	1.66093e-06	TRUE
chr5	88599885	88799221	-0.526719	-0.111631	-0.415088	2.8918	33.7973	1.83366e-07	1.68487e-06	TRUE
chr5	27400061	27599846	-0.143618	-0.518498	0.37488	3.20152	33.7621	1.85591e-07	1.70399e-06	FALSE
chr2	104999976	105200099	-0.836943	-0.479599	-0.357344	3.51264	33.7573	1.85893e-07	1.70542e-06	TRUE
chr18	76399986	76599743	0.521936	0.890545	-0.368609	3.44042	33.7524	1.86206e-07	1.70696e-06	FALSE
chr10	27000214	27200254	-0.160116	0.270866	-0.430981	2.7727	33.749	1.86423e-07	1.70762e-06	FALSE
chr8	11400470	11600188	0.636375	0.347916	0.288459	4.16537	33.6795	1.90916e-07	1.74741e-06	TRUE
chr4	135800062	136000125	0.963265	0.68646	0.276805	4.40741	33.663	1.91995e-07	1.75592e-06	TRUE
chr8	79599668	79799787	-0.55972	-0.20252	-0.357199	3.4651	33.644	1.93254e-07	1.76605e-06	TRUE
chr12	40199981	40399818	-0.0680882	0.263267	-0.331355	3.70964	33.6316	1.94071e-07	1.77215e-06	FALSE
chr5	125799989	126000008	0.392043	0.776217	-0.384174	3.0845	33.5781	1.97667e-07	1.80358e-06	FALSE
chr1	15200713	15399805	0.0453943	0.462575	-0.417181	2.8385	33.5736	1.97969e-07	1.80493e-06	FALSE
chr11	64600182	64799889	0.0414201	-0.336669	0.378089	3.25786	33.5463	1.99835e-07	1.82053e-06	FALSE
chrX	99599871	99800106	-0.832007	-1.31047	0.478468	2.70298	33.5333	2.00732e-07	1.82728e-06	FALSE
chr6	142999925	143199569	-1.35458	-1.03112	-0.323459	3.95181	33.5233	2.01417e-07	1.83169e-06	TRUE
chr6	37400652	37600049	1.05435	1.35426	-0.299908	4.1919	33.5217	2.01528e-07	1.83169e-06	FALSE
chr19	47200000	47400039	1.34138	1.05032	0.291064	4.30139	33.5117	2.02219e-07	1.83655e-06	TRUE
chr3	142800455	142999968	-0.750728	-0.362305	-0.388423	3.15348	33.499	2.03107e-07	1.84319e-06	TRUE
chr6	89799883	90000159	-0.0903371	0.384416	-0.474753	2.4195	33.4739	2.04865e-07	1.85771e-06	FALSE
chr14	15399647	15600023	0.22159	0.522116	-0.300527	4.14645	33.4396	2.07293e-07	1.87827e-06	FALSE
chr7	123799978	123999552	0.540708	0.95832	-0.417611	2.94063	33.4157	2.08998e-07	1.89226e-06	FALSE
chr2	80600356	80799984	-0.999669	-1.49097	0.491297	2.61282	33.3947	2.10511e-07	1.90449e-06	FALSE
chr19	10800006	10999458	-1.6812	-1.38588	-0.295316	4.39646	33.3363	2.14784e-07	1.94165e-06	TRUE
chr4	127199919	127400019	-0.495452	-0.874936	0.379484	3.69254	35.2687	2.17076e-07	1.96086e-06	FALSE
chr5	46200056	46399545	-0.730182	-1.19742	0.467236	2.67649	33.2899	2.18237e-07	1.96983e-06	FALSE
chr10	123400128	123599755	0.440796	0.923103	-0.482306	2.49179	33.2853	2.18584e-07	1.97145e-06	FALSE
chr9	96799629	96999350	-0.772169	-1.06682	0.29465	4.13534	33.2763	2.19264e-07	1.97606e-06	FALSE
chr18	42799908	43000009	0.0358984	0.4302	-0.394302	2.94081	33.2659	2.20049e-07	1.98086e-06	FALSE
chr1	80200136	80400230	1.0041	1.33937	-0.335276	3.82671	33.2648	2.20133e-07	1.98086e-06	FALSE
chr18	23600033	23800028	1.18274	1.58043	-0.397694	3.36737	33.2388	2.22111e-07	1.99713e-06	FALSE
chr1	56000932	56199813	0.417389	0.951202	-0.533813	2.13384	33.2337	2.225e-07	1.99793e-06	FALSE
chr8	40200057	40400009	0.659297	1.13215	-0.472849	2.55446	33.2332	2.2254e-07	1.99793e-06	FALSE
chr7	72200087	72399705	-0.444738	-0.901152	0.456414	2.58996	33.1955	2.25446e-07	2.02247e-06	FALSE
chr1	126600114	126800221	-0.460803	-0.061226	-0.399577	2.93804	33.184	2.26343e-07	2.02896e-06	TRUE
chrX	150400204	150599667	1.54747	2.13552	-0.58805	2.29371	33.1445	2.29439e-07	2.05515e-06	FALSE
chr1	40400132	40600237	-0.914297	-1.28402	0.369727	3.52426	33.1067	2.32454e-07	2.07901e-06	FALSE
chr3	58400059	58599866	0.727903	0.340347	0.387556	3.20709	33.1066	2.32457e-07	2.07901e-06	TRUE
chr10	4600591	4800151	0.0871874	0.397096	-0.309909	4.02824	33.1479	2.37493e-07	2.12244e-06	FALSE
chr2	71000113	71200009	-0.713064	-0.450425	-0.262639	4.56496	33.0401	2.37848e-07	2.12399e-06	TRUE
chr13	31799764	32000278	1.26298	0.93201	0.330966	3.85791	33.0162	2.39824e-07	2.13906e-06	TRUE
chr4	111200047	111400288	0.547356	0.98583	-0.438474	2.79853	33.0152	2.399e-07	2.13906e-06	FALSE
chrX	167400246	167600535	-0.981567	-0.548038	-0.433529	2.77345	33.0017	2.4102e-07	2.14664e-06	TRUE
chr1	153799838	154000347	-0.775874	-0.489221	-0.286653	4.15133	33.0006	2.41116e-07	2.14664e-06	TRUE
chr5	67600001	67800030	0.526755	0.16866	0.358096	3.49774	32.9891	2.4207e-07	2.15351e-06	TRUE
chr11	36000157	36199338	-0.0213136	0.360958	-0.382271	3.19867	32.96	2.44516e-07	2.17258e-06	FALSE
chr13	63000067	63200594	0.820162	1.13753	-0.317373	4.04829	33.0369	2.44584e-07	2.17258e-06	FALSE
chr10	27200251	27399851	0.149044	0.618024	-0.46898	2.44507	32.9374	2.46432e-07	2.18734e-06	FALSE
chr2	93799997	94000908	-0.234312	-0.578056	0.343744	3.69148	32.9321	2.46883e-07	2.18969e-06	FALSE
chr19	11600014	11800068	-0.35564	-0.695766	0.340127	3.63507	32.9172	2.48155e-07	2.19931e-06	FALSE
chr8	35400253	35599993	-0.639861	-0.394593	-0.245268	4.77923	32.8794	2.51421e-07	2.22657e-06	TRUE
chr15	88599816	88800376	1.20251	1.58447	-0.381964	3.46668	32.8688	2.52348e-07	2.23266e-06	FALSE
chr18	38000211	38199564	0.282137	0.598021	-0.315884	3.83046	32.8671	2.52489e-07	2.23266e-06	FALSE
chr7	76400019	76600063	-0.117357	0.28415	-0.401506	3.23652	33.7621	2.54151e-07	2.24567e-06	FALSE
chr8	37000009	37200279	-0.276853	-0.717112	0.440259	2.64594	32.8156	2.57029e-07	2.26939e-06	FALSE
chr15	40000076	40200258	-1.49443	-1.94258	0.44815	3.24483	33.0478	2.57403e-07	2.27099e-06	FALSE
chr8	86000081	86200133	-0.790777	-0.461974	-0.328803	3.83391	32.6764	2.69715e-07	2.37783e-06	TRUE
chr8	123599936	123800110	1.39121	1.03343	0.357784	3.68571	32.6494	2.72244e-07	2.39832e-06	TRUE
chr10	105999848	106199949	-0.232723	0.25521	-0.487933	2.22841	32.5261	2.84135e-07	2.5012e-06	FALSE
chr6	39799932	40000258	-0.380097	0.00317168	-0.383268	3.2195	32.5647	2.86548e-07	2.52016e-06	TRUE
chr7	25600183	25799865	-1.45403	-1.78475	0.330723	3.99349	32.5	2.86718e-07	2.52016e-06	FALSE
chr6	134000307	134199328	1.72161	2.07966	-0.358042	3.90938	32.4951	2.87205e-07	2.52255e-06	FALSE
chr4	127600427	127799672	0.375202	0.751855	-0.376654	3.41183	32.7014	2.89766e-07	2.54314e-06	FALSE
chr10	29600273	29799787	0.109898	0.602499	-0.492601	2.27888	32.4469	2.92049e-07	2.56127e-06	FALSE
chr1	138399862	138599993	0.0750181	-0.197164	0.272182	4.25351	32.433	2.93469e-07	2.57179e-06	FALSE
chr2	46199876	46399922	-0.174567	-0.637162	0.462595	2.51163	32.4014	2.96707e-07	2.59721e-06	FALSE
chr6	135400069	135599599	-0.501007	-0.193942	-0.307065	3.91887	32.4004	2.96812e-07	2.59721e-06	TRUE
chr4	94000153	94199800	0.441139	0.00339514	0.437744	2.64016	32.3725	2.99698e-07	2.62036e-06	TRUE
chr18	47200032	47399713	-0.0176914	0.395693	-0.413384	2.88242	32.3705	2.99903e-07	2.62036e-06	FALSE
chr19	10999455	11199934	-0.36871	-0.0407151	-0.327995	3.69024	32.3629	3.00695e-07	2.62532e-06	TRUE
chr16	7400152	7599960	-0.367902	-0.00579806	-0.362104	3.40213	32.3579	3.0122e-07	2.62795e-06	TRUE
chr7	18400007	18599661	-0.387837	-0.84569	0.457852	2.54781	32.3408	3.03018e-07	2.63976e-06	FALSE
chr7	58600401	58799803	0.567981	0.215942	0.352039	3.50857	32.3408	3.03023e-07	2.63976e-06	TRUE
chr8	79200064	79400077	0.647835	0.327206	0.320629	3.81671	32.2952	3.0786e-07	2.67991e-06	TRUE
chr11	119800028	120000094	-0.495068	-0.735511	0.240442	4.8249	32.293	3.08099e-07	2.68001e-06	FALSE
chr14	103000044	103199740	1.23935	0.867714	0.371631	3.50476	32.2563	3.12055e-07	2.71241e-06	TRUE
chr5	92999954	93199981	0.290725	-0.0688169	0.359542	3.36528	32.2415	3.13667e-07	2.7244e-06	TRUE
chr11	96199352	96399742	1.43438	1.14957	0.284814	4.37303	32.2184	3.16197e-07	2.74434e-06	TRUE
chr3	5000659	5199982	0.0667314	0.509492	-0.44276	2.61911	32.2087	3.17266e-07	2.75159e-06	FALSE
chr8	8399688	8600154	0.423642	0.0699457	0.353696	3.39807	32.1985	3.18399e-07	2.75938e-06	TRUE
chr5	150800055	151000021	-0.575665	-0.221263	-0.354402	3.42622	32.1746	3.21052e-07	2.78032e-06	TRUE
chr2	35000036	35199873	-0.361072	-0.624344	0.263272	4.37455	32.1647	3.2216e-07	2.78786e-06	FALSE
chr9	79399818	79599879	-0.138054	-0.614468	0.476414	2.32328	32.1567	3.23062e-07	2.7936e-06	FALSE
chr4	112000112	112201095	-0.156068	0.253356	-0.409424	2.79352	32.1399	3.24954e-07	2.8079e-06	FALSE
chr6	92400157	92599953	0.205521	0.579383	-0.373862	3.08862	32.1213	3.2707e-07	2.8241e-06	FALSE
chr6	84199982	84399954	0.259193	-0.0578246	0.317018	3.84092	32.1083	3.28558e-07	2.83487e-06	TRUE
chr9	97399697	97600175	0.757482	1.15876	-0.401276	2.96812	32.0968	3.29873e-07	2.84413e-06	FALSE
chr1	73999818	74199425	0.595639	0.900874	-0.305235	4.0615	32.0947	3.30118e-07	2.84415e-06	FALSE
chr3	83399909	83599877	-0.173564	-0.590336	0.416772	2.78721	32.0759	3.32285e-07	2.85987e-06	FALSE
chr13	57799616	57999675	0.191447	-0.154923	0.34637	3.45616	32.0747	3.3243e-07	2.85987e-06	TRUE
chr15	25799979	26000004	-1.34027	-1.72019	0.379922	3.50835	32.0485	3.35471e-07	2.88392e-06	FALSE
chr9	111399588	111599321	0.146053	0.533021	-0.386968	2.96645	32.0422	3.36219e-07	2.88824e-06	FALSE
chr5	36000002	36199475	0.195628	0.448293	-0.252664	4.66156	32.0328	3.37318e-07	2.89556e-06	FALSE
chr8	118800547	118999501	-0.808937	-1.18028	0.371339	3.34387	32.027	3.38003e-07	2.89932e-06	FALSE
chr2	137000208	137199972	-0.232827	-0.644777	0.41195	2.81493	32.015	3.39417e-07	2.90933e-06	FALSE
chr10	56200245	56400231	-0.580163	-0.150686	-0.429477	2.84963	32.1042	3.46735e-07	2.96988e-06	TRUE
chr12	17799180	18000109	-1.78535	-1.3685	-0.41685	3.11233	31.9482	3.47425e-07	2.97363e-06	TRUE
chr5	21799981	22000181	-0.248934	0.126526	-0.375459	3.04656	31.892	3.54304e-07	3.0303e-06	TRUE
chr17	75400468	75600122	-0.197723	-0.623521	0.425798	2.70603	31.8869	3.54941e-07	3.03312e-06	FALSE
chr8	108600143	108799994	0.81091	0.523605	0.287305	4.11856	31.8852	3.55151e-07	3.03312e-06	TRUE
chr9	74799785	75000199	1.46337	1.86482	-0.401451	3.43612	31.8792	3.55901e-07	3.03732e-06	FALSE
chr2	172600364	172800146	0.244488	0.534521	-0.290032	4.02027	31.8739	3.56557e-07	3.0407e-06	FALSE
chr1	69600313	69800629	-2.00355	-1.5912	-0.412353	3.47231	31.8583	3.58502e-07	3.05507e-06	TRUE
chr9	93800701	94000399	0.411016	0.0223555	0.388661	2.93473	31.8194	3.63412e-07	3.09467e-06	TRUE
chr5	114400173	114599606	0.841607	1.11851	-0.276902	4.34427	31.75	3.72335e-07	3.16835e-06	FALSE
chr9	99799885	99999916	-0.204543	0.195505	-0.400048	2.86678	31.7475	3.72662e-07	3.16884e-06	TRUE
chr16	69999725	70200289	0.686835	0.279012	0.407823	2.8279	31.7217	3.76045e-07	3.19529e-06	TRUE
chr1	75799560	75999752	0.176866	0.591719	-0.414853	2.76322	31.6965	3.79381e-07	3.22131e-06	FALSE
chr17	56200104	56399725	0.608251	0.851551	-0.2433	4.77034	31.6453	3.86239e-07	3.27717e-06	FALSE
chr13	110999567	111199673	-0.390565	-0.763114	0.372549	3.07408	31.5292	4.0228e-07	3.41081e-06	FALSE
chr2	168199898	168400185	0.0971717	0.397364	-0.300193	3.90294	31.4959	4.06996e-07	3.4483e-06	FALSE
chr5	96200004	96400155	-0.469737	-0.111049	-0.358687	3.13679	31.4876	4.08189e-07	3.45592e-06	TRUE
chr8	46600500	46799947	0.430173	0.71393	-0.283757	4.08624	31.4789	4.0944e-07	3.46402e-06	FALSE
chr4	55399974	55598940	0.104726	0.423272	-0.318547	3.73673	31.4326	4.16149e-07	3.51824e-06	FALSE
chr13	22199890	22400114	0.486797	0.866244	-0.379447	3.02917	31.4126	4.1908e-07	3.54047e-06	FALSE
chr11	32599757	32799948	-1.22745	-0.927899	-0.299547	4.07285	31.4031	4.20473e-07	3.54969e-06	TRUE
chr19	59200035	59399732	0.81587	0.467008	0.348863	3.56087	31.3997	4.20978e-07	3.5514e-06	TRUE
chr12	89999626	90199736	-0.311061	-0.683941	0.37288	3.14084	31.3817	4.23649e-07	3.56931e-06	FALSE
chrX	106200081	106399986	-0.883953	-0.346526	-0.537427	2.04135	31.3813	4.2371e-07	3.56931e-06	TRUE
chr18	73799638	74000005	-1.20658	-0.914508	-0.292075	4.13744	31.3322	4.31079e-07	3.62879e-06	TRUE
chr4	82999976	83199983	0.146349	-0.238596	0.384945	2.93026	31.3207	4.32833e-07	3.64095e-06	FALSE
chr8	61400002	61599856	-2.04852	-1.67923	-0.369291	3.77348	31.3173	4.33343e-07	3.64262e-06	TRUE
chr4	4200100	4400135	0.297847	0.744254	-0.446408	2.53483	31.306	4.3507e-07	3.65452e-06	FALSE
chr5	105399607	105599586	1.58157	1.27965	0.301921	4.25849	31.2979	4.36309e-07	3.66232e-06	TRUE
chr4	75599786	75799525	-0.163817	-0.597726	0.433909	2.75478	31.2764	4.39621e-07	3.68748e-06	FALSE
chr4	49400286	49599965	0.504749	0.0966676	0.408081	2.77734	31.2197	4.4848e-07	3.7591e-06	TRUE
chr5	119999556	120200155	-0.0106897	-0.315869	0.30518	3.84905	31.1658	4.57073e-07	3.82839e-06	FALSE
chr2	65999750	66199523	0.0462566	-0.35726	0.403517	2.79578	31.1015	4.67532e-07	3.91321e-06	FALSE
chr4	97200100	97400244	0.121118	-0.298931	0.42005	2.76133	31.005	4.8371e-07	4.04574e-06	FALSE
chr14	59600050	59800106	0.175241	0.498877	-0.323636	3.66163	30.9987	4.84791e-07	4.05109e-06	FALSE
chr5	104801019	105000186	1.09362	0.721219	0.372399	3.84265	33.771	4.85041e-07	4.05109e-06	TRUE
chr14	101799928	101999898	-0.320286	0.0967463	-0.417032	2.73699	30.9731	4.89183e-07	4.07816e-06	TRUE
chr12	110200160	110399987	-0.119854	-0.45428	0.334426	3.60748	30.9726	4.89268e-07	4.07816e-06	FALSE
chr12	109200135	109399952	-0.753158	-0.450576	-0.302582	3.96751	30.9723	4.89323e-07	4.07816e-06	TRUE
chr6	18200254	18399811	0.324317	0.759975	-0.435658	2.62672	30.9628	4.90965e-07	4.08894e-06	FALSE
chr16	39199932	39399889	0.14169	0.566721	-0.425031	2.66721	30.9591	4.91609e-07	4.0914e-06	FALSE
chr12	104399771	104599770	0.0341143	0.354231	-0.320116	3.76347	30.9015	5.01703e-07	4.17245e-06	FALSE
chr10	120999653	121199988	0.587702	0.249016	0.338685	3.59062	30.8805	5.05448e-07	4.20062e-06	TRUE
chr17	8999946	9199969	-0.633615	-0.28633	-0.347286	3.39029	30.8451	5.11804e-07	4.25044e-06	TRUE
chr17	25200038	25400021	-0.772688	-0.522892	-0.249797	4.57641	30.7986	5.20276e-07	4.31774e-06	TRUE
chr6	92000001	92199415	-0.953962	-1.28791	0.33395	3.8469	30.8453	5.22175e-07	4.32959e-06	FALSE
chr5	22799993	22999704	-0.143441	-0.547721	0.40428	2.8094	30.7869	5.22442e-07	4.32959e-06	FALSE
chr12	26000538	26199962	-0.46647	-0.752657	0.286187	4.13543	30.7675	5.26033e-07	4.35628e-06	FALSE
chr11	71800068	72000091	-0.263992	-0.574625	0.310633	3.89278	30.7604	5.27355e-07	4.36144e-06	FALSE
chr6	94000007	94199873	-0.235705	0.127108	-0.362813	3.06845	30.7602	5.27399e-07	4.36144e-06	TRUE
chr11	35400051	35600276	-0.776462	-1.07985	0.303387	4.02617	30.7512	5.29068e-07	4.37216e-06	FALSE
chr13	34999991	35200107	0.521649	0.829509	-0.307861	3.89326	30.7193	5.3508e-07	4.41874e-06	FALSE
chr11	100399995	100599459	1.9131	1.63801	0.275092	4.67106	30.7134	5.36202e-07	4.42186e-06	TRUE
chr4	83600521	83800308	-0.693472	-0.326796	-0.366676	3.1783	30.7133	5.36211e-07	4.42186e-06	TRUE
chr15	4800248	4999966	-0.605129	-1.02055	0.415423	2.83131	30.7002	5.38713e-07	4.43937e-06	FALSE
chr1	174799765	175000473	0.201303	0.623584	-0.422282	2.68523	30.665	5.45464e-07	4.49185e-06	FALSE
chr4	84799056	84999955	0.403537	0.00392363	0.399613	2.81897	30.6521	5.47962e-07	4.50805e-06	TRUE
chr6	127399796	127600297	-0.641595	-0.362777	-0.278819	4.12644	30.6501	5.48344e-07	4.50805e-06	TRUE
chr6	71599796	71800046	-0.92894	-0.679058	-0.249882	4.61389	30.6489	5.48582e-07	4.50805e-06	TRUE
chr1	31000248	31199844	-0.723349	-0.323262	-0.400087	2.83787	30.6435	5.49636e-07	4.51355e-06	TRUE
chr5	102799904	103000549	-0.360527	-0.736496	0.375969	3.02461	30.6276	5.52727e-07	4.53576e-06	FALSE
chr12	7599594	7800583	-0.233666	-0.654526	0.42086	2.70307	30.6255	5.53155e-07	4.5361e-06	FALSE
chr9	51200014	51399730	0.0891776	0.353355	-0.264177	4.44315	30.6963	5.56866e-07	4.56335e-06	FALSE
chr4	5599971	5799513	-0.552272	-0.157424	-0.394849	2.96176	30.5727	5.63587e-07	4.6152e-06	TRUE
chr5	92399806	92599960	-1.08461	-0.759272	-0.325335	3.75276	30.5659	5.64954e-07	4.62318e-06	TRUE
chr13	97400177	97599902	-0.824726	-0.539822	-0.284904	4.08728	30.5425	5.69662e-07	4.65846e-06	TRUE
chr1	42399794	42599732	-0.0201496	-0.409994	0.389844	2.84875	30.5213	5.73959e-07	4.69033e-06	FALSE
chr8	128200004	128399682	-0.979085	-1.24485	0.265761	4.44007	30.4497	5.88718e-07	4.80759e-06	FALSE
chrX	163599990	163799447	0.435546	0.031755	0.403791	2.76934	30.4385	5.91061e-07	4.82337e-06	TRUE
chr5	39399984	39600034	-0.0634358	-0.43032	0.366884	3.05095	30.4277	5.93338e-07	4.83545e-06	FALSE
chr3	18799985	19000424	-0.078064	-0.509944	0.43188	2.56761	30.4275	5.93365e-07	4.83545e-06	FALSE
chr6	6799839	6999910	-0.615453	-0.984584	0.369131	3.24244	30.3787	6.03754e-07	4.9167e-06	FALSE
chr1	54198980	54400100	-0.0910782	-0.41906	0.327982	3.61705	30.3563	6.08559e-07	4.9524e-06	FALSE
chr7	97800321	98000596	-1.04407	-0.748705	-0.295367	4.05799	30.3374	6.1268e-07	4.98248e-06	TRUE
chr15	11400048	11600051	0.928963	1.28252	-0.353553	3.60434	30.3315	6.13964e-07	4.98947e-06	FALSE
chr16	95999703	96200594	-0.81899	-1.13312	0.31413	4.07787	31.1046	6.1703e-07	5.00746e-06	FALSE
chr2	77799824	77999932	-0.572707	-0.157001	-0.415706	2.69678	30.3174	6.17031e-07	5.00746e-06	TRUE
chr14	55999955	56200089	0.154887	0.507888	-0.353002	3.15181	30.2859	6.23985e-07	5.0604e-06	FALSE
chr7	118799947	119000011	-0.76211	-1.08837	0.326264	3.69075	30.2837	6.24473e-07	5.06086e-06	FALSE
chr9	83000067	83200181	0.066493	0.427455	-0.360962	3.15715	30.2753	6.26348e-07	5.07255e-06	FALSE
chr4	128799816	128999746	0.0681999	0.333063	-0.264863	4.26992	30.2701	6.27492e-07	5.07832e-06	FALSE
chr3	130000068	130200373	-1.49931	-1.16107	-0.338249	3.73021	30.2418	6.33853e-07	5.12627e-06	TRUE
chr12	87399707	87600010	-2.40128	-1.92702	-0.474258	2.97617	30.2371	6.34905e-07	5.13124e-06	TRUE
chr13	36600162	36799818	-0.407789	-0.137094	-0.270695	4.17577	30.2304	6.36425e-07	5.13999e-06	TRUE
chr3	151799811	152000219	0.0827185	-0.348764	0.431483	2.5625	30.1937	6.44802e-07	5.20407e-06	FALSE
chr9	83600353	83800951	-0.436694	-0.795463	0.358769	3.2669	30.1631	6.51845e-07	5.25729e-06	FALSE
chr10	84600014	84799993	0.733093	0.449521	0.283573	4.11895	30.1521	6.54417e-07	5.27442e-06	TRUE
chr2	173999934	174200246	-0.937415	-0.675772	-0.261642	4.3467	30.1312	6.59297e-07	5.3101e-06	TRUE
chr8	104999282	105199783	0.715042	0.371317	0.343726	3.48865	30.12	6.61933e-07	5.32768e-06	TRUE
chr2	20799780	20999968	0.820458	1.18096	-0.360507	3.33029	30.1174	6.62559e-07	5.32906e-06	FALSE
chr10	104999976	105199791	0.236979	0.695982	-0.459003	2.43073	30.1016	6.66285e-07	5.35536e-06	FALSE
chr11	114199937	114400019	-0.811077	-0.528539	-0.282538	4.09478	30.0551	6.77424e-07	5.44117e-06	TRUE
chr9	117799901	118000185	-0.310315	-0.670832	0.360517	3.16168	30.0047	6.89707e-07	5.53604e-06	FALSE
chr10	56800183	57000336	-0.257543	-0.697417	0.439874	2.54456	29.9946	6.922e-07	5.55225e-06	FALSE
chr12	85999337	86199880	-0.194565	0.0705755	-0.26514	4.24453	29.97	6.9829e-07	5.59729e-06	TRUE
chr2	159800029	160000226	0.362929	0.0141811	0.348748	3.39671	29.9441	7.04783e-07	5.64547e-06	TRUE
chr8	86600241	86800050	0.315424	-0.0157933	0.331217	3.53451	29.9087	7.13734e-07	5.71328e-06	TRUE
chr1	35799948	36000318	0.748386	0.491095	0.257291	4.36461	29.9007	7.15788e-07	5.72419e-06	TRUE
chr13	69199750	69399765	0.444554	0.0905694	0.353985	3.23918	29.8996	7.16072e-07	5.72419e-06	TRUE
chr19	21999941	22199808	0.048923	0.412576	-0.363653	3.02101	29.8942	7.17435e-07	5.73118e-06	FALSE
chr2	136199941	136399745	-0.0826979	0.368555	-0.451253	2.43845	29.8892	7.18722e-07	5.73559e-06	FALSE
chrX	166399999	166600077	0.574769	0.967898	-0.393129	2.89082	29.8883	7.18964e-07	5.73559e-06	FALSE
chr14	17999290	18200305	-0.454528	-0.767553	0.313024	3.77158	29.8597	7.2635e-07	5.78968e-06	FALSE
chr13	98800214	98999963	0.56608	0.912892	-0.346812	3.40431	29.8582	7.2673e-07	5.78968e-06	FALSE
chr3	97800238	98000149	0.524098	0.239693	0.284405	4.03616	29.8516	7.28439e-07	5.79936e-06	TRUE
chr6	148199986	148400014	0.319489	0.683683	-0.364193	3.19142	29.8459	7.29935e-07	5.80733e-06	FALSE
chr8	93600215	93800048	-0.132907	-0.49572	0.362813	3.03523	29.8438	7.30487e-07	5.80779e-06	FALSE
chr13	20599423	20799857	-0.664755	-0.296712	-0.368043	3.10768	29.8046	7.40783e-07	5.88566e-06	TRUE
chr6	142599144	142799956	0.620424	0.338236	0.282188	4.08478	29.7978	7.42575e-07	5.89592e-06	TRUE
chr4	35199747	35400532	-1.60824	-1.23102	-0.377219	3.33625	29.7707	7.49809e-07	5.94841e-06	TRUE
chr8	92800024	93000150	-0.064947	-0.395643	0.330696	3.49137	29.7693	7.502e-07	5.94841e-06	FALSE
chr16	36999937	37200250	-0.944006	-0.594667	-0.349339	3.43652	29.7551	7.54011e-07	5.9746e-06	TRUE
chr12	111999997	112200114	0.221581	0.5087	-0.287119	4.01967	29.7444	7.56892e-07	5.99338e-06	FALSE
chr2	168400182	168599700	0.468323	0.177794	0.290529	3.93507	29.7219	7.63027e-07	6.03789e-06	TRUE
chr9	74400140	74600317	-0.611524	-1.01266	0.401131	2.84831	29.7007	7.6882e-07	6.07963e-06	FALSE
chr3	14600304	14799987	-0.2416	0.176673	-0.418272	2.76249	29.6875	7.7247e-07	6.10438e-06	TRUE
chr17	49599779	49800135	-0.790518	-1.14043	0.349914	3.41559	29.6798	7.74586e-07	6.11699e-06	FALSE
chr15	30600426	30800539	0.271291	0.631016	-0.359725	3.1911	29.6737	7.76297e-07	6.12638e-06	FALSE
chr18	74600456	74799290	0.702412	0.403692	0.298719	3.95576	29.6648	7.7877e-07	6.14177e-06	TRUE
chr13	83799853	83999895	0.168708	0.601848	-0.43314	2.53712	29.6602	7.80048e-07	6.14772e-06	FALSE
chr11	96399739	96600819	0.265595	-0.00039704	0.265992	4.15975	29.6395	7.85856e-07	6.18934e-06	TRUE
chr16	25200549	25399933	-1.06467	-0.736486	-0.328179	3.76004	29.6012	7.96711e-07	6.26564e-06	TRUE
chr2	16400015	16599075	0.427276	0.787955	-0.360679	3.29873	29.6	7.97053e-07	6.26564e-06	FALSE
chr6	96799899	96999763	0.0485133	-0.371237	0.41975	2.58802	29.5997	7.97145e-07	6.26564e-06	FALSE
chr2	84600037	84799763	-0.0687037	-0.373018	0.304315	3.76494	29.5916	7.99471e-07	6.27804e-06	FALSE
chr18	33200003	33399970	-0.626658	-0.306192	-0.320466	3.65426	29.5904	7.99792e-07	6.27804e-06	TRUE
chr8	81400114	81599719	0.985898	1.35914	-0.37324	3.44656	29.5756	8.0404e-07	6.30718e-06	FALSE
chr12	39000386	39200015	-0.0948845	-0.50932	0.414436	2.75828	29.5315	8.16879e-07	6.40361e-06	FALSE
chr2	78599534	78799453	0.476299	0.128487	0.347812	3.13064	29.4928	8.28281e-07	6.48866e-06	TRUE
chr2	33599773	33799963	1.67712	1.42283	0.254281	4.72731	29.4612	8.37734e-07	6.55476e-06	TRUE
chr12	74999914	75199883	0.0765809	-0.228163	0.304744	3.7675	29.4608	8.37835e-07	6.55476e-06	FALSE
chr11	117800044	118000064	0.611256	0.385374	0.225882	4.86958	29.4525	8.40332e-07	6.56992e-06	TRUE
chr1	12599874	12799861	-0.149923	-0.570271	0.420348	2.62732	29.4278	8.47838e-07	6.62419e-06	FALSE
chr5	52199652	52400132	-0.043193	0.285438	-0.328631	3.50606	29.3832	8.61515e-07	6.72653e-06	FALSE
chr2	140400548	140599916	-0.159399	-0.616531	0.457132	2.47081	29.3814	8.62082e-07	6.72653e-06	FALSE
chr2	50800242	51000190	-0.189279	-0.543907	0.354628	3.3293	29.3598	8.688e-07	6.77444e-06	FALSE
chr15	94599618	94799899	0.0419786	0.401929	-0.35995	3.0232	29.3361	8.76229e-07	6.82784e-06	FALSE
chr2	73999614	74199870	0.456244	0.822872	-0.366628	3.15436	29.3218	8.80716e-07	6.85825e-06	FALSE
chr10	127600006	127799891	-0.281017	-0.0245037	-0.256514	4.25445	29.32	8.81307e-07	6.85831e-06	TRUE
chr19	7600281	7800399	-0.756159	-0.363822	-0.392336	2.83425	29.3112	8.84098e-07	6.87252e-06	TRUE
chr1	39199960	39399825	-0.611152	-0.848014	0.236863	4.7689	29.3105	8.84303e-07	6.87252e-06	FALSE
chr6	35600308	35799963	-0.116266	0.294455	-0.410721	2.64799	29.2555	9.01972e-07	7.0052e-06	FALSE
chr4	4000055	4200103	0.0629538	0.486877	-0.423923	2.56077	29.2447	9.05497e-07	7.02793e-06	FALSE
chr19	6814125	7000165	0.850809	0.585994	0.264815	4.24468	29.2099	9.16895e-07	7.11169e-06	TRUE
chr17	73200263	73400132	-0.514671	-0.261503	-0.253167	4.40679	29.2015	9.19667e-07	7.12848e-06	TRUE
chrX	107200049	107400663	-1.16501	-1.64375	0.478744	2.57281	29.1753	9.2838e-07	7.19127e-06	FALSE
chr16	95799932	95999706	-1.63664	-2.03736	0.400715	4.57479	39.8108	9.30578e-07	7.20354e-06	FALSE
chr2	38799941	38999875	0.00272937	-0.313299	0.316029	3.60191	29.1376	9.4107e-07	7.27996e-06	FALSE
chr8	113200224	113399666	0.125102	-0.228922	0.354024	3.08241	29.1184	9.476e-07	7.32565e-06	FALSE
chr12	75399977	75600365	0.563942	0.283445	0.280496	4.01897	29.0807	9.60548e-07	7.42086e-06	TRUE
chr12	36199765	36400013	-0.743179	-0.38575	-0.357429	3.31574	29.0777	9.61611e-07	7.4242e-06	TRUE
chr6	86399974	86599407	1.05904	1.33303	-0.273993	4.27936	29.0699	9.64323e-07	7.44024e-06	FALSE
chr3	146600394	146799911	-1.42505	-1.76382	0.338773	3.77037	29.0638	9.6644e-07	7.45167e-06	FALSE
chr13	114600054	114800088	-0.716456	-1.06202	0.345562	3.50597	29.0456	9.72778e-07	7.49562e-06	FALSE
chr17	23200014	23400238	0.608331	0.171617	0.436714	2.46211	29.0143	9.83817e-07	7.57572e-06	TRUE
chr18	47399710	47599450	0.0261634	0.4094	-0.383237	2.86386	29.0066	9.86557e-07	7.59183e-06	FALSE
chr2	116799823	116999698	1.83632	2.22068	-0.384358	3.54733	28.9856	9.94074e-07	7.64467e-06	FALSE
chr9	35800057	36000589	0.0319696	0.480046	-0.448076	2.35998	28.9792	9.96365e-07	7.65728e-06	FALSE
chr16	21399767	21599927	1.11493	0.828071	0.286863	4.05102	28.9707	9.99431e-07	7.67582e-06	TRUE
chr4	109000105	109199986	0.263356	-0.0362262	0.299582	3.87208	28.9664	1.00099e-06	7.68275e-06	TRUE
chrX	130600027	130800068	-1.55421	-1.05733	-0.496876	2.38613	28.962	1.00258e-06	7.68993e-06	TRUE
chr5	98800032	98999540	0.234828	-0.177459	0.412287	2.61666	28.9367	1.01177e-06	7.75533e-06	TRUE
chr14	123399993	123600091	-0.265304	0.207599	-0.472903	2.16774	28.9091	1.0219e-06	7.82787e-06	TRUE
chr1	73399965	73600411	-0.36408	-0.775803	0.411724	2.75067	28.9019	1.02457e-06	7.84026e-06	FALSE
chr2	55999940	56200243	-0.234765	0.210401	-0.445166	2.3606	28.9011	1.02485e-06	7.84026e-06	TRUE
chr7	118599962	118799950	0.332252	0.0509808	0.281271	3.96212	28.866	1.03792e-06	7.93508e-06	TRUE
chr1	61199716	61399851	0.522266	0.926835	-0.404569	2.82725	28.8418	1.04703e-06	7.99953e-06	FALSE
chr19	48400097	48600333	0.122939	0.464818	-0.341879	3.26321	28.8223	1.05446e-06	8.05103e-06	FALSE
chr16	77201199	77399773	0.71755	0.254454	0.463096	2.30863	28.8142	1.05756e-06	8.06944e-06	TRUE
chr4	39200770	39399880	0.381013	-0.0818336	0.462847	2.32941	28.8022	1.06215e-06	8.0992e-06	TRUE
chr7	35400003	35599654	-0.202095	-0.509573	0.307479	3.75166	28.7997	1.06312e-06	8.10136e-06	FALSE
chr4	103200107	103400309	-2.42052	-2.79599	0.375469	3.98891	28.7194	1.09444e-06	8.3346e-06	FALSE
chr3	60000037	60199960	0.487584	0.179026	0.308558	3.72421	28.7092	1.09849e-06	8.36009e-06	TRUE
chr12	69199799	69400245	2.30346	2.63848	-0.335022	4.22594	28.7026	1.10111e-06	8.37385e-06	FALSE
chr6	73000053	73199871	-1.16132	-1.52525	0.363928	3.38565	28.701	1.10173e-06	8.37385e-06	FALSE
chr14	13600045	13799624	-0.208251	-0.607296	0.399045	2.73143	28.6985	1.10273e-06	8.37601e-06	FALSE
chr17	70000010	70201468	-0.29397	-0.705239	0.411269	2.66806	28.6938	1.1046e-06	8.38483e-06	FALSE
chr11	34542511	34799667	-1.05022	-0.707226	-0.342997	3.47113	28.6243	1.13275e-06	8.59298e-06	TRUE
chr11	101599884	101800003	-0.553889	-0.241026	-0.312863	3.6894	28.6213	1.13401e-06	8.59692e-06	TRUE
chr8	83999852	84199751	0.225487	0.463822	-0.238335	4.57562	28.6132	1.13733e-06	8.61653e-06	FALSE
chr8	103600013	103800302	-0.147807	-0.506656	0.358849	3.04972	28.6013	1.14224e-06	8.64814e-06	FALSE
chr15	31399998	31600568	-0.415606	-0.767076	0.351469	3.32525	28.5844	1.14929e-06	8.69592e-06	FALSE
chr19	55600069	55800149	-0.357095	-0.104837	-0.252259	4.43344	28.5696	1.15547e-06	8.73706e-06	TRUE
chr9	7799804	8000064	-1.79073	-1.43975	-0.350975	3.67198	28.5588	1.15997e-06	8.76403e-06	TRUE
chr17	62200238	62399814	-0.0452632	0.411784	-0.457047	2.67799	29.9545	1.16053e-06	8.76403e-06	FALSE
chr11	103400015	103600006	-0.911416	-0.597289	-0.314127	3.89489	28.8956	1.17086e-06	8.8364e-06	TRUE
chr1	131000404	131199720	0.70404	0.959285	-0.255245	4.4168	28.5279	1.17304e-06	8.84711e-06	FALSE
chr10	69799805	69999834	0.6749	0.345552	0.329347	3.53639	28.5261	1.17382e-06	8.84737e-06	TRUE
chr18	41799818	42000003	0.481094	0.850653	-0.369559	2.99023	28.4981	1.1858e-06	8.93189e-06	FALSE
chr12	26399945	26600065	-1.12508	-1.48587	0.360792	3.48477	28.4907	1.18898e-06	8.95012e-06	FALSE
chr2	43200161	43399734	-0.456099	-0.0223998	-0.4337	2.52009	28.4807	1.19329e-06	8.97683e-06	TRUE
chr13	23600552	23800063	-0.193845	0.156814	-0.350659	3.48339	29.1176	1.21991e-06	9.16955e-06	TRUE
chr6	5400385	5600084	-0.648782	-1.00337	0.354585	3.22516	28.4137	1.22268e-06	9.16955e-06	FALSE
chrX	57000632	57200006	1.00644	0.634487	0.371954	3.01461	28.4134	1.22282e-06	9.16955e-06	TRUE
chr10	75999992	76199951	-0.417676	-0.115783	-0.301893	3.747	28.4132	1.2229e-06	9.16955e-06	TRUE
chr3	153400832	153599859	-0.0791472	-0.393612	0.314465	3.69445	28.4121	1.22341e-06	9.16955e-06	FALSE
chr14	114799983	114999171	1.21726	1.65631	-0.439048	2.73235	28.4117	1.2236e-06	9.16955e-06	FALSE
chr1	121999563	122199667	-0.630244	-0.265942	-0.364302	3.07032	28.4047	1.22671e-06	9.18702e-06	TRUE
chr9	120799868	121000442	-0.13193	-0.387005	0.255075	4.24307	28.4019	1.22792e-06	9.19026e-06	FALSE
chr2	53200164	53400013	-1.06778	-0.663492	-0.404286	2.77909	28.395	1.231e-06	9.20743e-06	TRUE
chr2	154200042	154400280	0.29163	-0.0391511	0.330781	3.5215	28.3523	1.25026e-06	9.34551e-06	TRUE
chr16	93799749	94000048	0.528681	0.276737	0.251944	4.38078	28.3385	1.25653e-06	9.38644e-06	TRUE
chr16	7200153	7400155	0.0084473	0.336873	-0.328426	3.4643	28.3364	1.25752e-06	9.38785e-06	FALSE
chr5	42000007	42199769	-0.0654147	0.375502	-0.440916	2.38618	28.3184	1.26575e-06	9.44329e-06	FALSE
chr1	78600323	78800131	-0.498911	-0.159613	-0.339299	3.35687	28.3019	1.27338e-06	9.49415e-06	TRUE
chr3	49799996	50000047	0.287829	-0.113376	0.401205	2.78953	28.2953	1.27646e-06	9.51108e-06	TRUE
chr16	9600437	9800535	-0.250329	-0.588409	0.33808	3.31822	28.2752	1.28583e-06	9.57479e-06	FALSE
chr5	124200154	124400019	-1.16294	-0.926068	-0.236867	4.72037	28.2451	1.29997e-06	9.67399e-06	TRUE
chr6	13599770	13800029	-0.16818	0.240936	-0.409116	2.62045	28.2196	1.31209e-06	9.75607e-06	FALSE
chr15	35000043	35199913	-0.0285859	0.30743	-0.336016	3.38473	28.2184	1.31266e-06	9.75607e-06	FALSE
chr16	90000552	90199016	-1.63269	-1.32653	-0.306164	4.04435	28.2084	1.31742e-06	9.77979e-06	TRUE
chr16	89800060	90000555	2.25714	2.59851	-0.34137	4.1639	28.2082	1.31752e-06	9.77979e-06	FALSE
chr14	101600220	101799931	-0.746077	-0.359086	-0.386991	2.80611	28.1752	1.33347e-06	9.89194e-06	TRUE
chr2	75200003	75399775	0.759717	0.46326	0.296457	3.80647	28.0312	1.40533e-06	1.04184e-05	TRUE
chr7	143400620	143599732	0.31465	0.0720688	0.242581	4.46554	28.015	1.41365e-06	1.0462e-05	TRUE
chr19	17600030	17800089	-0.0438728	0.299184	-0.343056	3.17892	28.0149	1.41369e-06	1.0462e-05	FALSE
chr5	74400250	74600015	-0.328542	-0.0399156	-0.288626	3.91135	28.0145	1.41388e-06	1.0462e-05	TRUE
chr14	7800141	8000103	1.38489	1.76444	-0.379542	3.27532	28.0006	1.42107e-06	1.05086e-05	FALSE
chr6	27999525	28199996	0.650379	0.301487	0.348892	3.07154	27.9954	1.4238e-06	1.05221e-05	TRUE
chr11	118200090	118400677	-1.72632	-1.46826	-0.258061	4.65865	27.9915	1.42582e-06	1.05304e-05	TRUE
chr6	70799847	71000265	0.754935	1.0828	-0.327868	3.56951	27.9633	1.44054e-06	1.06325e-05	FALSE
chr1	172800270	172999977	-0.0288691	0.39907	-0.427939	2.43258	27.9193	1.46391e-06	1.07982e-05	FALSE
chr6	15000124	15199786	0.138334	0.583641	-0.445308	2.36447	27.9089	1.46945e-06	1.08322e-05	FALSE
chr1	39399822	39600406	-0.604556	-0.847591	0.243035	4.50759	27.8993	1.47462e-06	1.08635e-05	FALSE
chr3	27999852	28200007	0.817199	0.536122	0.281078	3.97519	27.893	1.47804e-06	1.08819e-05	TRUE
chr18	11399738	11600164	1.03882	0.697381	0.341437	3.38921	27.8594	1.4963e-06	1.10095e-05	TRUE
chr6	111800256	112000013	-0.201941	-0.639671	0.43773	2.49901	27.8447	1.50433e-06	1.10616e-05	FALSE
chr4	154400074	154599999	-0.548698	-0.240757	-0.307942	3.64582	27.7988	1.52981e-06	1.12416e-05	TRUE
chr4	82399940	82599978	-0.0793645	0.297909	-0.377273	2.91305	27.7971	1.53073e-06	1.12416e-05	FALSE
chr18	3200053	3400233	2.07604	2.62892	-0.552879	2.65951	27.7944	1.53224e-06	1.12457e-05	FALSE
chr3	105199923	105400425	0.336876	0.68465	-0.347774	3.15857	27.7685	1.54685e-06	1.13458e-05	FALSE
chr7	104999328	105199824	-0.0210126	-0.471387	0.450374	2.27765	27.7381	1.56414e-06	1.14654e-05	FALSE
chr3	96600314	96800055	-0.402144	-0.667566	0.265423	4.08748	27.7301	1.56872e-06	1.14919e-05	FALSE
chr13	61200023	61399921	-0.439673	-0.848464	0.408791	2.68047	27.7225	1.57308e-06	1.15166e-05	FALSE
chr8	116799865	116999980	0.279014	0.00943677	0.269578	4.04612	27.6902	1.59183e-06	1.16467e-05	TRUE
chr2	101199978	101400070	0.626227	0.229962	0.396266	2.71077	27.6849	1.59491e-06	1.16619e-05	TRUE
chr4	136599877	136800483	0.373128	0.612677	-0.239549	4.57011	27.6791	1.59828e-06	1.16793e-05	FALSE
chr6	91400528	91600007	0.645106	0.411215	0.233891	4.56788	27.6643	1.60701e-06	1.17358e-05	TRUE
chr2	122400063	122599955	-0.294516	-0.572288	0.277771	3.99675	27.6502	1.61533e-06	1.17892e-05	FALSE
chr3	32000080	32200666	0.05451	-0.298193	0.352703	3.01356	27.6302	1.62721e-06	1.18685e-05	FALSE
chr6	72000029	72200185	-0.358594	-0.107205	-0.251389	4.23765	27.6269	1.62919e-06	1.18734e-05	TRUE
chr14	34999748	35199939	-0.334106	0.00304247	-0.337149	3.10122	27.6257	1.62991e-06	1.18734e-05	TRUE
chr7	114800051	115000067	0.0245051	0.325716	-0.30121	3.93378	27.91	1.63169e-06	1.18791e-05	FALSE
chr6	111599578	111800259	0.0217944	-0.396928	0.418722	2.53564	27.5978	1.64662e-06	1.19804e-05	FALSE
chr3	100400680	100600325	0.947131	1.24958	-0.302447	3.83857	27.5836	1.65521e-06	1.20297e-05	FALSE
chr15	101999950	102199676	0.945444	0.692003	0.253441	4.31399	27.5813	1.65662e-06	1.20297e-05	TRUE
chr2	84399927	84600040	-0.450395	-0.14741	-0.302985	3.70291	27.5806	1.65702e-06	1.20297e-05	TRUE
chr2	168599697	168799975	-0.552483	-0.864024	0.311541	4.01483	29.1616	1.65826e-06	1.20297e-05	FALSE
chr14	22200002	22399936	-0.164458	-0.517092	0.352635	3.40923	27.8553	1.65853e-06	1.20297e-05	FALSE
chr13	85200019	85399649	1.35574	1.75761	-0.40187	3.02176	27.5106	1.70017e-06	1.23241e-05	FALSE
chr1	154199840	154400268	-0.0821509	0.270052	-0.352203	3.04362	27.475	1.72251e-06	1.24784e-05	FALSE
chr3	37000046	37200189	-1.06438	-0.743154	-0.321223	3.63923	27.4507	1.73795e-06	1.25825e-05	TRUE
chr4	57800876	57999542	-1.10031	-0.842288	-0.258026	4.32157	27.4423	1.74331e-06	1.26135e-05	TRUE
chr16	19399882	19600088	0.025451	-0.42894	0.454391	2.25375	27.4387	1.7456e-06	1.26191e-05	FALSE
chrX	106399983	106600235	0.028527	0.524446	-0.495919	2.16487	27.4377	1.74624e-06	1.26191e-05	FALSE
chr3	40000336	40200399	-0.338684	-0.749572	0.410887	2.68073	27.429	1.75185e-06	1.26519e-05	FALSE
chr17	66399975	66599977	-0.39652	-0.729124	0.332604	3.33715	27.4272	1.75303e-06	1.26526e-05	FALSE
chr4	119399728	119600053	-0.0901854	0.170029	-0.260215	4.20961	27.4119	1.76289e-06	1.2716e-05	FALSE
chr10	18799134	18999824	0.900943	1.13617	-0.235231	4.83696	27.4006	1.77019e-06	1.27608e-05	FALSE
chr5	139599997	139800008	0.642233	0.383867	0.258366	4.15952	27.3936	1.77478e-06	1.2779e-05	TRUE
chr9	23200150	23400051	-0.274794	-0.625189	0.350396	3.08491	27.3934	1.77489e-06	1.2779e-05	FALSE
chr7	76200040	76400022	-0.191386	-0.512018	0.320633	3.53023	27.3874	1.77883e-06	1.27995e-05	FALSE
chr8	128799868	128999966	-1.04567	-0.566673	-0.478996	2.14707	27.3699	1.79032e-06	1.28743e-05	TRUE
chr9	104799331	104999869	0.700775	0.393752	0.307023	3.66296	27.3496	1.80373e-06	1.29628e-05	TRUE
chr10	17199012	17399717	0.678294	0.371681	0.306613	3.64278	27.3139	1.82756e-06	1.3126e-05	TRUE
chr2	73200216	73400201	-1.07157	-1.3463	0.274729	4.12361	27.309	1.83082e-06	1.31414e-05	FALSE
chr11	93199957	93399577	-0.156438	-0.512238	0.3558	2.95648	27.301	1.83624e-06	1.31723e-05	FALSE
chr15	9599594	9800115	-0.363124	-0.0212751	-0.341849	3.242	27.2565	1.86652e-06	1.33813e-05	TRUE
chr10	97400220	97600307	-0.0585589	0.360254	-0.418813	2.45914	27.2406	1.8775e-06	1.34518e-05	FALSE
chr16	64800135	65000664	-0.565929	-0.144281	-0.421648	2.5689	27.2248	1.88849e-06	1.35223e-05	TRUE
chr10	11400062	11600095	0.0952381	0.472596	-0.377358	2.82231	27.2145	1.89561e-06	1.3565e-05	FALSE
chr4	105599987	105800029	-0.269622	-0.638157	0.368535	2.88695	27.206	1.90159e-06	1.35995e-05	FALSE
chr5	29999574	30199953	-0.213313	0.0615907	-0.274903	3.9437	27.1868	1.91509e-06	1.36877e-05	TRUE
chr10	16999918	17199015	0.599019	0.261679	0.337341	3.29361	27.1817	1.91864e-06	1.37048e-05	TRUE
chr13	39199950	39399320	-0.0205486	0.344846	-0.365395	2.88032	27.1616	1.93291e-06	1.37983e-05	FALSE
chr4	93199749	93399967	0.101211	0.527781	-0.42657	2.47261	27.1516	1.94004e-06	1.38407e-05	FALSE
chr10	127199836	127399992	0.0254906	0.277272	-0.251781	4.25777	27.1236	1.96022e-06	1.39762e-05	FALSE
chr2	92399944	92599833	-0.933854	-0.675749	-0.258105	4.18849	27.1183	1.96402e-06	1.39949e-05	TRUE
chrX	74399676	74599461	-2.08333	-1.62451	-0.458814	2.75845	27.1133	1.96763e-06	1.40121e-05	TRUE
chr2	132000022	132199888	-0.265346	-0.523289	0.257942	4.12395	27.1115	1.96894e-06	1.40129e-05	FALSE
chr1	24399937	24599836	-0.0538307	0.334433	-0.388264	2.70037	27.0696	1.99961e-06	1.42221e-05	FALSE
chr19	21399805	21599675	0.0485162	-0.234851	0.283367	3.87719	27.068	2.00076e-06	1.42221e-05	FALSE
chr1	169200020	169399473	0.148002	-0.233218	0.381221	2.76204	27.0336	2.02637e-06	1.43954e-05	FALSE
chr5	132000042	132200193	-0.108831	0.223379	-0.33221	3.30925	27.0196	2.03687e-06	1.44613e-05	FALSE
chr2	117999868	118199679	-0.792707	-1.12978	0.337074	3.46851	26.9835	2.06414e-06	1.46461e-05	FALSE
chr5	38399600	38600004	-1.10274	-0.775792	-0.326952	3.53629	26.9806	2.06638e-06	1.46531e-05	TRUE
chr10	83999838	84200062	-0.0197043	0.309049	-0.328754	3.43909	26.9708	2.07388e-06	1.46974e-05	FALSE
chr6	8599705	8800165	-2.80818	-3.2137	0.40552	3.96525	26.9686	2.07551e-06	1.47001e-05	FALSE
chr4	120000210	120199770	-1.4554	-1.20496	-0.25044	4.53455	26.9578	2.08382e-06	1.47459e-05	TRUE
chr14	14599782	14800473	0.308096	0.645495	-0.3374	3.30891	26.957	2.08449e-06	1.47459e-05	FALSE
chr5	9000772	9200496	-2.07412	-1.68772	-0.386407	3.42189	26.9383	2.0989e-06	1.48389e-05	TRUE
chr9	45200070	45400053	-1.60674	-1.37012	-0.236621	4.80088	26.9086	2.1221e-06	1.49939e-05	TRUE
chr5	74600012	74799988	-0.445284	-0.171226	-0.274057	3.94745	26.8501	2.16846e-06	1.53123e-05	TRUE
chr6	68800004	69000210	-0.662279	-0.211335	-0.450945	2.3025	26.8397	2.17679e-06	1.53618e-05	TRUE
chr8	9800180	9999573	1.08794	0.742119	0.345824	3.42432	26.8038	2.20593e-06	1.55581e-05	TRUE
chr11	109800060	110000061	-1.1704	-0.877044	-0.293357	3.88881	26.7825	2.22334e-06	1.56715e-05	TRUE
chr15	48800035	49000086	0.0304315	0.452751	-0.422319	2.54845	26.7671	2.23604e-06	1.57515e-05	FALSE
chr18	45800238	46000384	0.270776	-0.0753561	0.346132	3.06238	26.7341	2.26357e-06	1.59342e-05	TRUE
chr1	181199990	181400653	-0.480258	-0.220347	-0.259912	4.09076	26.7328	2.26468e-06	1.59342e-05	TRUE
chr3	132799982	133000033	0.056749	0.405238	-0.348489	3.0128	26.7233	2.27266e-06	1.59808e-05	FALSE
chr7	25400009	25600186	-0.600008	-0.892302	0.292294	3.9329	26.7142	2.28032e-06	1.6025e-05	FALSE
chr14	59399881	59600053	-0.0613757	0.265736	-0.327112	3.36991	26.7101	2.28381e-06	1.60399e-05	FALSE
chr10	85399500	85599236	-0.416977	-0.697537	0.28056	4.00977	26.7005	2.29187e-06	1.60869e-05	FALSE
chr3	100800690	101000280	1.41438	1.16515	0.24923	4.72689	26.7421	2.31576e-06	1.62449e-05	TRUE
chr7	137400166	137600245	-0.193247	-0.537915	0.344668	3.31748	26.7016	2.35059e-06	1.64794e-05	FALSE
chr1	184600416	184799968	-1.16965	-1.49274	0.32309	4.0116	27.9068	2.36249e-06	1.65529e-05	FALSE
chr5	32000015	32200146	-1.58076	-1.33492	-0.245841	4.61052	26.6104	2.36974e-06	1.65938e-05	TRUE
chr7	137799663	137999392	0.04293	0.36717	-0.32424	3.35816	26.6007	2.37829e-06	1.66438e-05	FALSE
chr2	180199913	180400014	0.0216983	0.2654	-0.243702	4.27789	26.5968	2.38172e-06	1.66578e-05	FALSE
chrX	137000483	137200164	-1.82566	-2.3962	0.570534	2.19385	26.5775	2.39884e-06	1.67676e-05	FALSE
chr3	14799984	14999952	0.588471	0.958966	-0.370495	3.06287	26.6222	2.40537e-06	1.68033e-05	FALSE
chr15	87800127	88000009	-0.237423	-0.524523	0.2871	3.81062	26.5494	2.42398e-06	1.69232e-05	FALSE
chr6	130999853	131200089	0.305097	-0.13406	0.439157	2.4033	26.5216	2.44913e-06	1.70886e-05	TRUE
chr15	82400229	82599914	0.187855	0.524768	-0.336912	3.40609	26.6044	2.47049e-06	1.72274e-05	FALSE
chr12	39399962	39599977	1.34683	0.989402	0.35743	3.22515	26.4865	2.48124e-06	1.72921e-05	TRUE
chr3	70200159	70400027	0.107233	0.548053	-0.44082	2.31474	26.467	2.49927e-06	1.74074e-05	FALSE
chr12	40799720	41000252	-0.111534	0.212214	-0.323747	3.39961	26.4536	2.51179e-06	1.74842e-05	FALSE
chr1	22200117	22400019	-0.675676	-1.06264	0.386959	2.8308	26.4256	2.53799e-06	1.76539e-05	FALSE
chr10	57200008	57399984	-0.34784	-0.791264	0.443424	2.29349	26.423	2.54051e-06	1.76539e-05	FALSE
chr4	107799720	108000037	0.641399	0.401209	0.24019	4.45825	26.4217	2.5417e-06	1.76539e-05	TRUE
chr7	48999868	49199975	-0.359123	-0.0944661	-0.264657	4.08972	26.4212	2.54218e-06	1.76539e-05	TRUE
chr1	190800090	190999959	1.2586	1.55734	-0.298743	3.89976	26.4065	2.55613e-06	1.77319e-05	FALSE
chr10	105799505	105999851	-0.437276	-0.913256	0.47598	2.20157	26.4062	2.55643e-06	1.77319e-05	FALSE
chr11	94599950	94799809	-0.34824	-0.0675178	-0.280722	3.86747	26.3954	2.56668e-06	1.77925e-05	TRUE
chr4	64001338	64200035	-0.983496	-0.638471	-0.345025	3.12455	26.3793	2.58209e-06	1.78887e-05	TRUE
chr2	11800081	11999777	-0.90013	-0.56034	-0.33979	3.33498	26.3774	2.5839e-06	1.78907e-05	TRUE
chr10	111200272	111399924	0.0879932	0.342417	-0.254423	4.10666	26.3565	2.60405e-06	1.80197e-05	FALSE
chr11	46799836	46999481	0.0999638	0.44689	-0.346926	2.97553	26.3415	2.61861e-06	1.81034e-05	FALSE
chr2	51000187	51200751	-0.126689	-0.471052	0.344363	3.2024	26.3409	2.61923e-06	1.81034e-05	FALSE
chr2	173200187	173400070	0.796487	0.575123	0.221364	4.74337	26.3279	2.63191e-06	1.81803e-05	TRUE
chr13	42600530	42799854	-0.19257	-0.553889	0.361319	2.89999	26.3073	2.65219e-06	1.83096e-05	FALSE
chr3	26600723	26799867	0.0743563	-0.358141	0.432497	2.39976	26.3032	2.65619e-06	1.83168e-05	FALSE
chr17	88399863	88599998	-1.37018	-1.08802	-0.282159	4.02206	26.3031	2.65635e-06	1.83168e-05	TRUE
chr4	5799510	6000033	-0.537741	-0.940311	0.40257	2.71544	26.2834	2.67589e-06	1.84407e-05	FALSE
chr1	31599795	31800009	0.219255	-0.207326	0.426582	2.4129	26.2248	2.73489e-06	1.88363e-05	TRUE
chr15	88000006	88199917	-0.514895	-0.815506	0.300611	3.65285	26.2152	2.74473e-06	1.8893e-05	FALSE
chr3	106800037	106999975	0.850959	0.595346	0.255613	4.16686	26.2105	2.74955e-06	1.89151e-05	TRUE
chr15	58399565	58599927	-0.096201	0.16006	-0.256261	4.1173	26.1982	2.76219e-06	1.8982e-05	FALSE
chr8	94999737	95199940	-0.28264	-0.517848	0.235208	4.40737	26.1977	2.76269e-06	1.8982e-05	FALSE
chr1	21400058	21599942	0.664039	0.990899	-0.326859	3.57943	26.1963	2.76413e-06	1.8982e-05	FALSE
chr5	111599929	111800320	-0.809909	-0.573068	-0.236841	4.63181	26.19	2.77062e-06	1.90154e-05	TRUE
chr13	95999715	96199948	-0.637456	-0.352506	-0.28495	3.80202	26.1845	2.77627e-06	1.90431e-05	TRUE
chr3	28200004	28400067	0.565182	0.281366	0.283816	3.84916	26.1739	2.78732e-06	1.91068e-05	TRUE
chr15	96200132	96400220	-0.785882	-1.02497	0.239092	4.45155	26.1724	2.78882e-06	1.91068e-05	FALSE
chr9	46200198	46399562	-2.01085	-2.33913	0.328286	3.97089	26.1662	2.79528e-06	1.91399e-05	FALSE
chr8	79799784	80000490	0.251028	0.581013	-0.329985	3.24574	26.1437	2.81887e-06	1.92902e-05	FALSE
chr6	41599722	41799584	-0.12043	-0.383084	0.262653	4.00946	26.1414	2.82126e-06	1.92953e-05	FALSE
chr5	66000061	66199603	-1.49009	-1.22696	-0.263129	4.34419	26.1345	2.82855e-06	1.93339e-05	TRUE
chr9	29999926	30200136	-0.0664639	-0.391258	0.324794	3.26456	26.1251	2.83842e-06	1.93901e-05	FALSE
chr6	138000023	138199758	-0.449753	-0.0723353	-0.377418	2.74433	26.1231	2.84058e-06	1.93936e-05	TRUE
chr19	26399704	26600169	0.967795	0.669745	0.298051	3.72319	26.1176	2.84644e-06	1.94223e-05	TRUE
chr7	118400151	118599965	-0.230135	-0.508979	0.278844	3.87876	26.0932	2.8724e-06	1.95871e-05	FALSE
chr1	92400269	92600042	-1.11772	-0.868438	-0.249285	4.44086	26.0918	2.87394e-06	1.95871e-05	TRUE
chr2	105800234	106000246	-0.594408	-1.00663	0.412222	2.73367	26.1354	2.8987e-06	1.97445e-05	FALSE
chr7	106599900	106800116	0.183742	-0.199516	0.383257	2.76892	26.0517	2.91729e-06	1.98595e-05	FALSE
chr17	74000112	74200809	-0.278815	-0.564863	0.286048	3.80064	26.0474	2.92197e-06	1.98799e-05	FALSE
chr5	20200199	20400244	0.0947176	0.443583	-0.348866	3.18972	26.034	2.93663e-06	1.99681e-05	FALSE
chr4	74599930	74800036	0.0474876	0.510721	-0.463234	2.0792	26.0273	2.94393e-06	2.00061e-05	FALSE
chr8	30999953	31199934	0.488284	0.902288	-0.414004	2.54146	26.0126	2.96022e-06	2.01052e-05	FALSE
chr15	13199592	13400385	-0.0558618	0.312199	-0.368061	2.80767	25.9819	2.9943e-06	2.03249e-05	FALSE
chr14	71399934	71599830	-0.671626	-0.365864	-0.305762	3.67475	25.977	2.99976e-06	2.03502e-05	TRUE
chr9	30600045	30800005	0.0743864	-0.248145	0.322531	3.28083	25.9743	3.00287e-06	2.03595e-05	FALSE
chr8	114400299	114600029	1.07462	1.38142	-0.306799	3.79576	25.9697	3.00801e-06	2.03826e-05	FALSE
chr9	102600154	102800033	0.130793	0.44417	-0.313377	3.45942	25.9666	3.01146e-06	2.03942e-05	FALSE
chr4	105999874	106200176	-0.128677	-0.452686	0.32401	3.33849	25.9639	3.01457e-06	2.04035e-05	FALSE
chr12	11199877	11400338	-0.245869	0.113751	-0.359621	2.86257	25.9538	3.02593e-06	2.04628e-05	TRUE
chr11	43599816	43800006	0.375967	0.666543	-0.290576	3.7758	25.953	3.02681e-06	2.04628e-05	FALSE
chr7	43599630	43799933	-0.0374967	0.262576	-0.300073	3.62373	25.9412	3.04016e-06	2.05412e-05	FALSE
chr5	116000076	116200380	-0.1807	0.13304	-0.31374	3.43221	25.9378	3.04411e-06	2.05561e-05	TRUE
chr9	23599900	23799889	0.172946	0.556375	-0.383429	2.67901	25.9362	3.04588e-06	2.05562e-05	FALSE
chr4	107200149	107399975	-1.68053	-1.41735	-0.263188	4.34139	25.9252	3.05847e-06	2.06293e-05	TRUE
chr3	134799904	134999984	-0.245114	-0.678996	0.433882	2.2888	25.9043	3.08241e-06	2.07788e-05	FALSE
chr11	28800002	29000056	-0.0859559	-0.452595	0.366639	2.80974	25.902	3.08513e-06	2.07852e-05	FALSE
chr2	50399596	50599798	0.20016	0.543227	-0.343067	3.33509	25.8806	3.10986e-06	2.09398e-05	FALSE
chr8	87199814	87399804	0.398155	0.0709888	0.327167	3.23698	25.8702	3.12206e-06	2.10099e-05	TRUE
chr15	96799902	97000302	-1.38871	-1.11582	-0.272891	4.14684	25.8608	3.13299e-06	2.10714e-05	TRUE
chr3	75400271	75600981	0.76044	0.402801	0.357639	3.29068	26.3821	3.2052e-06	2.15447e-05	TRUE
chr3	155799778	155999534	0.338456	-0.054001	0.392457	2.64271	25.7957	3.21035e-06	2.1567e-05	TRUE
chr4	106200173	106399888	1.38757	1.05804	0.329521	3.48834	25.7763	3.23368e-06	2.17114e-05	TRUE
chr2	91000086	91199810	0.428128	0.659961	-0.231833	4.46963	25.7567	3.25755e-06	2.18591e-05	FALSE
chr7	109000190	109199980	0.809058	1.13836	-0.329297	3.3675	25.7521	3.26319e-06	2.18845e-05	FALSE
chr17	18800245	19000254	-0.0319507	-0.43513	0.40318	2.57251	25.7277	3.29307e-06	2.20722e-05	FALSE
chr7	73400049	73600033	1.89184	2.30407	-0.412232	3.0766	25.7168	3.30658e-06	2.21501e-05	FALSE
chr14	37199920	37400026	-0.392942	0.00480464	-0.397746	2.57	25.7114	3.31332e-06	2.21826e-05	TRUE
chr8	116399854	116600131	1.80472	1.51567	0.289047	4.1512	25.6981	3.32987e-06	2.22807e-05	TRUE
chr5	65399893	65599800	0.753594	0.51522	0.238374	4.46556	25.6834	3.34824e-06	2.23909e-05	TRUE
chr16	31000007	31200110	-0.325122	-0.558573	0.233451	4.46224	25.6331	3.41206e-06	2.28047e-05	FALSE
chr7	56399993	56599824	0.107578	0.506065	-0.398487	2.54755	25.6303	3.41562e-06	2.28155e-05	FALSE
chr5	68000172	68199918	-1.44048	-1.81779	0.377314	3.18857	25.6201	3.42872e-06	2.28899e-05	FALSE
chr6	103400122	103599838	-0.147731	-0.5271	0.379368	2.7039	25.6042	3.4492e-06	2.30136e-05	FALSE
chr6	91000083	91199440	0.0580284	0.302954	-0.244926	4.1967	25.5998	3.45489e-06	2.30385e-05	FALSE
chr3	67199586	67399782	-0.0561205	-0.43151	0.37539	2.95399	26.1336	3.50503e-06	2.33595e-05	FALSE
chr7	102599947	102800021	-1.42321	-1.06494	-0.358265	3.05071	25.55	3.52018e-06	2.34473e-05	TRUE
chr1	142599983	142800171	-0.0769936	0.365907	-0.4429	2.22187	25.5103	3.57303e-06	2.37858e-05	FALSE
chr9	112400026	112600114	-1.48875	-1.17242	-0.316335	3.68461	25.5	3.58689e-06	2.38645e-05	TRUE
chr12	8399926	8600174	-0.420492	-0.722193	0.301701	3.60546	25.4748	3.62099e-06	2.40696e-05	FALSE
chr5	8000215	8200206	0.509365	0.912013	-0.402647	2.63698	25.4742	3.62182e-06	2.40696e-05	FALSE
chr2	134600071	134800182	-0.12351	0.254423	-0.377933	2.69659	25.4602	3.64097e-06	2.41832e-05	FALSE
chr14	10999767	11200149	-0.00809504	-0.345907	0.337812	3.03347	25.4352	3.67535e-06	2.43977e-05	FALSE
chr7	95799557	96000364	0.23381	-0.111743	0.345553	2.92334	25.3885	3.74043e-06	2.48158e-05	TRUE
chr1	138599990	138800056	-0.660672	-0.915628	0.254956	4.2037	25.3852	3.74517e-06	2.48332e-05	FALSE
chr12	33400280	33600194	-0.89596	-0.568014	-0.327947	3.32022	25.3675	3.77019e-06	2.49849e-05	TRUE
chr16	48399689	48600367	1.06121	0.749745	0.311467	3.6372	25.3504	3.79445e-06	2.51315e-05	TRUE
chrX	150999964	151200006	-0.0961062	0.276397	-0.372503	2.81083	25.3488	3.79672e-06	2.51324e-05	FALSE
chr13	51999252	52200550	-0.466693	-0.253592	-0.213101	4.76009	25.3242	3.83216e-06	2.53527e-05	TRUE
chr7	119800049	119999934	-0.114892	0.196151	-0.311043	3.41338	25.3149	3.84561e-06	2.54214e-05	FALSE
chr10	8800079	8999905	-0.0292911	-0.361824	0.332533	3.31514	25.314	3.84687e-06	2.54214e-05	FALSE
chr18	41600063	41799821	0.261717	-0.0894918	0.351209	2.91194	25.3094	3.85351e-06	2.5451e-05	TRUE
chr7	128801492	129000659	1.05764	1.51506	-0.457416	2.35662	25.2812	3.8947e-06	2.57085e-05	FALSE
chr12	17399508	17599762	0.440838	0.181106	0.259732	3.99901	25.2729	3.90685e-06	2.57742e-05	TRUE
chr16	6999608	7200156	-0.0107708	0.29796	-0.30873	3.4873	25.2622	3.92268e-06	2.58573e-05	FALSE
chr7	13600081	13799489	-0.462901	-0.0520908	-0.41081	2.4736	25.2614	3.92385e-06	2.58573e-05	TRUE
chr2	53400010	53599931	0.131739	0.564266	-0.432527	2.30839	25.2424	3.9521e-06	2.60289e-05	FALSE
chr13	99199876	99399974	0.549898	0.253646	0.296252	3.8787	25.796	3.95955e-06	2.60634e-05	TRUE
chr6	7399879	7600240	-0.306555	-0.723708	0.417153	2.40973	25.182	4.04316e-06	2.65988e-05	FALSE
chr1	90399777	90599943	-0.213603	-0.52343	0.309827	3.48138	25.1267	4.12834e-06	2.7144e-05	FALSE
chr14	34600000	34800003	-1.35084	-1.78928	0.438442	2.62513	25.1156	4.14564e-06	2.72424e-05	FALSE
chr9	51600056	51800004	-0.00218913	-0.271532	0.269343	3.96398	25.0991	4.17159e-06	2.73977e-05	FALSE
chrX	10999643	11200146	0.244093	-0.161875	0.405968	2.49495	25.0932	4.18084e-06	2.7443e-05	TRUE
chr14	87799884	88000014	-0.118564	0.302941	-0.421506	2.31131	25.0833	4.19649e-06	2.75304e-05	FALSE
chr16	90199013	90399844	-0.778063	-0.488613	-0.28945	3.70487	25.0657	4.22458e-06	2.76972e-05	TRUE
chr1	44199696	44399904	-0.522385	-0.0761723	-0.446213	2.1097	25.0644	4.22663e-06	2.76972e-05	TRUE
chr1	162799940	162999918	0.0936548	0.463416	-0.369761	2.76855	25.0532	4.24448e-06	2.77986e-05	FALSE
chr10	126400278	126600216	-0.918021	-1.29531	0.377286	2.92277	25.0484	4.25222e-06	2.78338e-05	FALSE
chr10	92199868	92399909	0.0234427	-0.306968	0.33041	3.19883	25.0451	4.25749e-06	2.7839e-05	FALSE
chrX	60000449	60200038	0.551603	0.114337	0.437266	2.22023	25.045	4.25775e-06	2.7839e-05	TRUE
chr4	97400241	97600254	1.90308	1.58242	0.32066	3.80154	25.0306	4.28093e-06	2.79749e-05	TRUE
chr18	55999940	56199854	-0.584579	-0.915098	0.330519	3.1443	25.0045	4.32343e-06	2.8237e-05	FALSE
chr15	49200195	49400514	-0.0765968	0.360401	-0.436998	2.35075	24.9978	4.33437e-06	2.82927e-05	FALSE
chr4	140199935	140399873	-0.279949	-0.603037	0.323088	3.55286	25.4257	4.38188e-06	2.85869e-05	FALSE
chr1	35599462	35799951	0.586412	0.331554	0.254858	4.17985	24.9463	4.41958e-06	2.88169e-05	TRUE
chr16	29000015	29200012	-0.322333	-0.656634	0.334301	3.05106	24.9397	4.43056e-06	2.88588e-05	FALSE
chr5	130199769	130400110	-1.38872	-1.71764	0.32892	3.60773	24.9395	4.43093e-06	2.88588e-05	FALSE
chr9	13799960	14000013	1.20498	1.47173	-0.266748	4.11627	24.9305	4.44602e-06	2.8941e-05	FALSE
chr13	9200156	9400386	0.30761	0.602403	-0.294793	3.65312	24.925	4.45529e-06	2.89853e-05	FALSE
chr19	15600369	15800718	0.131058	-0.194766	0.325824	3.0671	24.9132	4.4753e-06	2.90994e-05	FALSE
chr7	84200188	84400108	-1.75643	-2.04969	0.293253	4.16365	24.8984	4.50049e-06	2.9247e-05	FALSE
chr7	133199597	133400328	0.16777	0.50589	-0.338121	3.03112	24.8879	4.51842e-06	2.93473e-05	FALSE
chr4	104200430	104399968	0.303372	-0.015205	0.318577	3.13226	24.8772	4.53672e-06	2.94498e-05	TRUE
chr8	125000087	125199967	0.664336	0.444346	0.21999	4.70509	24.8208	4.63463e-06	3.00687e-05	TRUE
chr12	35399983	35600333	0.527735	0.831706	-0.303972	3.57719	24.8159	4.6432e-06	3.01077e-05	FALSE
chr8	14799931	14999812	0.537161	0.234848	0.302313	3.52538	24.7949	4.68028e-06	3.03314e-05	TRUE
chr7	136400040	136600080	0.0689545	0.387016	-0.318061	3.26344	24.7793	4.70818e-06	3.04954e-05	FALSE
chr10	77799869	78000031	-0.101424	-0.341319	0.239895	4.21845	24.7692	4.72614e-06	3.05948e-05	FALSE
chr7	5000082	5200019	-2.00197	-1.67605	-0.325913	3.75986	24.7363	4.78548e-06	3.0962e-05	TRUE
chr7	14000019	14199974	0.199305	-0.199304	0.398609	2.52931	24.7345	4.78884e-06	3.09666e-05	TRUE
chr2	38200493	38399632	-1.17781	-0.910928	-0.266881	4.06971	24.7205	4.81423e-06	3.11137e-05	TRUE
chr3	154000014	154200272	-0.241006	-0.562842	0.321836	3.20766	24.7042	4.84417e-06	3.12899e-05	FALSE
chr12	28199882	28400069	0.0568227	-0.260031	0.316854	3.11317	24.6701	4.90733e-06	3.16805e-05	FALSE
chr11	46199652	46399812	1.27892	0.967949	0.310975	3.69253	24.6637	4.91918e-06	3.17395e-05	TRUE
chr16	77000126	77201202	-1.44506	-1.04193	-0.403124	2.70379	24.6576	4.93056e-06	3.17955e-05	TRUE
chr3	108800130	108999953	-0.0452483	-0.299179	0.253931	4.02911	24.6309	4.9809e-06	3.21024e-05	FALSE
chr4	76000415	76200323	0.1338	-0.269449	0.403248	2.43784	24.6021	5.03567e-06	3.24377e-05	FALSE
chr11	3799736	3999974	-0.319664	-0.603497	0.283834	3.73421	24.5859	5.06669e-06	3.26125e-05	FALSE
chr7	46600217	46800078	-0.216735	-0.4608	0.244066	4.15099	24.585	5.06837e-06	3.26125e-05	FALSE
chr11	107400004	107600077	-0.177266	-0.406034	0.228768	4.40432	24.5782	5.08146e-06	3.26756e-05	FALSE
chr12	50999607	51199349	-0.373204	-0.790714	0.41751	2.35992	24.5771	5.08373e-06	3.26756e-05	FALSE
chr13	106800902	107000132	1.03729	1.36017	-0.322883	3.49064	24.5531	5.13031e-06	3.29569e-05	FALSE
chr13	114800085	115000374	-0.932058	-1.26505	0.332997	3.2837	24.55	5.1362e-06	3.29767e-05	FALSE
chr13	25399927	25599909	0.427127	0.812668	-0.385541	2.63669	24.5441	5.14791e-06	3.30338e-05	FALSE
chr15	26800335	27000011	-0.167344	-0.531705	0.364361	2.7598	24.4884	5.25809e-06	3.37224e-05	FALSE
chr18	64200379	64400007	-0.188698	-0.503657	0.314959	3.14438	24.4711	5.29282e-06	3.39266e-05	FALSE
chr15	54999546	55199839	1.78839	2.1401	-0.351709	3.53163	24.4591	5.31694e-06	3.40626e-05	FALSE
chr1	20800334	20999877	1.96913	2.32121	-0.352085	3.66374	24.4559	5.32345e-06	3.40858e-05	FALSE
chr6	97599566	97799936	-0.0630896	0.257525	-0.320614	3.30834	24.4105	5.41634e-06	3.46616e-05	FALSE
chr9	111599318	111799915	-0.116743	0.227607	-0.34435	2.90861	24.3818	5.47573e-06	3.50226e-05	FALSE
chr13	82000004	82200285	-0.360996	0.0198276	-0.380824	2.59912	24.3707	5.49908e-06	3.51528e-05	TRUE
chr2	20600097	20799783	0.0353456	-0.277823	0.313169	3.29572	24.3629	5.51542e-06	3.52381e-05	FALSE
chr11	35199306	35400054	-0.675085	-0.943709	0.268623	3.96497	24.3548	5.53235e-06	3.5327e-05	FALSE
chr7	4399957	4600974	0.895102	0.661185	0.233917	4.37033	24.331	5.58274e-06	3.56294e-05	TRUE
chr7	96000361	96199946	0.108373	-0.245892	0.354265	2.83823	24.2916	5.66731e-06	3.61495e-05	FALSE
chr14	22399933	22600240	-0.103765	-0.41135	0.307585	3.44838	24.2854	5.68069e-06	3.62152e-05	FALSE
chr7	88199836	88400276	-0.155716	0.220591	-0.376307	2.65149	24.2823	5.68737e-06	3.62207e-05	FALSE
chr5	113400087	113599946	0.429816	0.159495	0.270321	3.84079	24.2822	5.68773e-06	3.62207e-05	TRUE
chr13	59400090	59600237	1.22467	0.9135	0.311172	3.57098	24.2701	5.71402e-06	3.63684e-05	TRUE
chr12	28600014	28799746	1.60349	1.96285	-0.359361	3.3699	24.2379	5.78457e-06	3.67975e-05	FALSE
chr1	189599347	189799828	1.49047	1.21555	0.274913	4.01541	24.2326	5.79629e-06	3.68521e-05	TRUE
chr8	48399961	48600272	0.0312442	0.399654	-0.36841	2.69601	24.2241	5.81505e-06	3.69514e-05	FALSE
chr7	102400248	102599950	-1.40712	-1.13419	-0.272929	4.03224	24.1919	5.88707e-06	3.73888e-05	TRUE
chr19	47599808	47798785	-1.36998	-1.64927	0.279291	4.04518	24.153	5.97518e-06	3.79279e-05	FALSE
chr13	43000054	43200370	0.660044	0.360175	0.299869	3.53415	24.1444	5.99478e-06	3.80303e-05	TRUE
chr4	122600237	122799990	1.78554	1.36642	0.419119	2.82695	24.2008	5.99779e-06	3.80303e-05	TRUE
chr14	48000052	48199989	0.664446	0.416659	0.247788	4.1465	24.1289	6.03037e-06	3.82162e-05	TRUE
chr3	20600030	20799432	0.669506	1.05518	-0.385678	2.72098	24.1146	6.06352e-06	3.84056e-05	FALSE
chr12	113399867	113600023	-1.7321	-1.41508	-0.317018	3.80953	24.1578	6.0967e-06	3.85949e-05	TRUE
chr7	125599990	125800864	-1.2659	-1.01861	-0.247289	4.24105	24.0943	6.11075e-06	3.8663e-05	TRUE
chr2	112200420	112400361	1.47016	1.90117	-0.431011	2.68592	24.0858	6.1307e-06	3.87684e-05	FALSE
chr12	55999341	56200039	0.633839	1.02295	-0.389106	2.62497	24.0837	6.13559e-06	3.87784e-05	FALSE
chr13	89600056	89799730	0.409585	0.75893	-0.349345	2.91605	24.0793	6.14584e-06	3.88223e-05	FALSE
chr17	10199906	10399769	-0.824926	-0.508163	-0.316763	3.38351	24.0513	6.21206e-06	3.92195e-05	TRUE
chr6	37600046	37800369	0.837583	1.11576	-0.278179	3.94601	24.0432	6.23131e-06	3.93198e-05	FALSE
chr12	51600210	51800116	0.957438	1.25037	-0.292935	3.71889	24.0062	6.32019e-06	3.98525e-05	FALSE
chr10	79200090	79399995	-0.668074	-1.13321	0.465134	2.12564	24.0042	6.32498e-06	3.98525e-05	FALSE
chr10	3199911	3399998	2.11951	2.57529	-0.455781	2.96856	24.0038	6.3259e-06	3.98525e-05	FALSE
chr10	28400239	28600113	2.11102	1.80458	0.306442	3.93656	23.9992	6.3371e-06	3.98848e-05	TRUE
chr6	131599974	131800111	0.180332	0.625087	-0.444755	2.21355	24.0021	6.33783e-06	3.98848e-05	FALSE
chr2	25600309	25799946	-0.392086	-0.145721	-0.246365	4.0729	23.9828	6.377e-06	4.01099e-05	TRUE
chr2	121400173	121599961	-0.739703	-0.440295	-0.299408	3.50296	23.977	6.39113e-06	4.01772e-05	TRUE
chr6	57000008	57199737	-0.179438	0.141972	-0.32141	3.05467	23.9645	6.4219e-06	4.03491e-05	TRUE
chr1	36800094	36999947	0.652019	0.869013	-0.216993	4.6272	23.9532	6.4496e-06	4.05014e-05	FALSE
chr10	29000006	29200358	-0.277079	0.0919332	-0.369012	2.69084	23.9517	6.4534e-06	4.05036e-05	TRUE
chr11	7800148	8000011	0.0673256	-0.28967	0.356996	2.79564	23.9487	6.46074e-06	4.0528e-05	FALSE
chr8	114600026	114799763	1.07653	1.32429	-0.247752	4.24345	23.9193	6.53407e-06	4.09662e-05	FALSE
chr4	117999749	118200027	0.300476	0.0590437	0.241433	4.14065	23.9146	6.54567e-06	4.1017e-05	TRUE
chr1	105200534	105400401	0.227018	0.559317	-0.332298	2.99539	23.9005	6.5813e-06	4.12182e-05	FALSE
chr7	31200141	31399808	-1.12198	-0.706565	-0.415414	2.47316	23.8899	6.6079e-06	4.13628e-05	TRUE
chr3	86000296	86200523	0.0163075	-0.264274	0.280582	3.73287	23.8863	6.61698e-06	4.13976e-05	FALSE
chr14	45800786	46000276	0.301009	0.655547	-0.354539	2.82421	23.8745	6.64703e-06	4.15634e-05	FALSE
chr11	62199626	62399826	0.152486	-0.0877471	0.240233	4.12526	23.863	6.6765e-06	4.17254e-05	TRUE
chr2	131800032	132000025	1.23002	0.966727	0.263297	4.04133	23.8484	6.71398e-06	4.19374e-05	TRUE
chr8	106199820	106400185	-0.701743	-0.464071	-0.237672	4.23803	23.8413	6.73224e-06	4.20277e-05	TRUE
chr5	115400068	115600019	-0.370168	-0.603864	0.233696	4.26124	23.84	6.7356e-06	4.20277e-05	FALSE
chr1	183600046	183800190	1.2022	0.957926	0.244274	4.3237	23.8366	6.7444e-06	4.20603e-05	TRUE
chr4	54999874	55200021	0.159325	-0.145556	0.304882	3.61442	23.9632	6.75451e-06	4.2101e-05	TRUE
chr6	46600476	46799811	-0.262326	-0.709218	0.446891	2.24663	23.954	6.7781e-06	4.22256e-05	FALSE
chr4	62400904	62600001	1.76682	2.05167	-0.284854	4.09684	23.8178	6.79313e-06	4.22968e-05	FALSE
chr11	54399227	54599544	0.308938	0.0530962	0.255842	4.02438	23.7897	6.86691e-06	4.27335e-05	TRUE
chr6	24399233	24600023	0.410811	0.0191136	0.391697	2.81442	24.7592	6.93458e-06	4.31318e-05	TRUE
chr16	12800012	13000528	-0.415775	-0.733352	0.317577	3.30215	23.7624	6.9392e-06	4.31327e-05	FALSE
chr16	36600150	36799673	0.124931	-0.178048	0.302979	3.51302	23.7613	6.94208e-06	4.31327e-05	FALSE
chr4	137600423	137799957	0.161283	-0.0789627	0.240245	4.14477	23.7436	6.98936e-06	4.34029e-05	TRUE
chr2	128199590	128400109	-0.984433	-1.2097	0.225267	4.57174	23.7423	6.99296e-06	4.34029e-05	FALSE
chr11	93599853	93800170	-0.341827	-0.680389	0.338562	2.94813	23.7107	7.07823e-06	4.39089e-05	FALSE
chr12	28799743	28999795	-0.692181	-0.417046	-0.275135	3.77697	23.626	7.31244e-06	4.53379e-05	TRUE
chr3	138399826	138600228	1.11916	0.841732	0.277424	3.88237	23.6241	7.31767e-06	4.53464e-05	TRUE
chr5	109399829	109599891	1.09226	1.43795	-0.345691	3.0995	23.6149	7.34362e-06	4.54832e-05	FALSE
chr4	16199780	16399703	-0.872554	-0.520124	-0.352429	2.8781	23.6132	7.34843e-06	4.5489e-05	TRUE
chr18	84000051	84200157	0.46134	0.213843	0.247497	4.08097	23.6107	7.35555e-06	4.55091e-05	TRUE
chr10	115999882	116200143	0.0384922	-0.294096	0.332588	2.93586	23.6049	7.37214e-06	4.55877e-05	FALSE
chr9	68200028	68399927	-0.316402	0.0100982	-0.3265	3.07798	23.5975	7.39317e-06	4.56937e-05	TRUE
chr12	44200188	44399426	0.236148	0.646125	-0.409977	2.34312	23.5757	7.45537e-06	4.60539e-05	FALSE
chr4	125199900	125400065	-0.105217	0.166476	-0.271693	3.82386	23.5642	7.48826e-06	4.62327e-05	FALSE
chr3	119200067	119399829	0.122035	0.509551	-0.387517	2.56116	23.5586	7.50443e-06	4.62868e-05	FALSE
chr15	99999709	100200074	0.623926	0.388743	0.235183	4.21484	23.5585	7.5049e-06	4.62868e-05	TRUE
chr6	27800088	27999528	0.199708	-0.179308	0.379016	2.71438	23.6076	7.52212e-06	4.63687e-05	TRUE
chr6	52799937	52999987	-2.9536	-2.64081	-0.312784	4.38246	23.5415	7.55397e-06	4.65405e-05	TRUE
chr10	123599752	123800334	0.274338	0.670511	-0.396173	2.55299	23.4907	7.70329e-06	4.74356e-05	FALSE
chr6	96599950	96799902	-0.194377	-0.628312	0.433935	2.3755	23.9088	7.75038e-06	4.77006e-05	FALSE
chr11	112399018	112599868	0.050359	-0.278648	0.329007	3.25919	23.6385	7.76522e-06	4.77669e-05	FALSE
chr16	24000031	24200344	3.05889	2.78192	0.276977	4.92272	23.463	7.78584e-06	4.78687e-05	TRUE
chr2	164600164	164799751	0.671529	0.420883	0.250645	4.08436	23.4562	7.80645e-06	4.79703e-05	TRUE
chr16	29399916	29599807	0.619258	0.292845	0.326413	3.05734	23.4388	7.85888e-06	4.82672e-05	TRUE
chr7	93200019	93400197	0.324564	0.784322	-0.459758	2.07946	23.4342	7.87292e-06	4.83281e-05	FALSE
chr3	82200589	82400523	-0.15574	-0.496996	0.341256	2.9304	23.4226	7.90814e-06	4.85083e-05	FALSE
chr1	190599790	190800093	-0.321355	-0.639193	0.317838	3.17623	23.4218	7.91054e-06	4.85083e-05	FALSE
chr2	44199947	44400067	-0.0210062	0.294255	-0.315261	3.2647	23.4187	7.92011e-06	4.85401e-05	FALSE
chr14	61200394	61399930	-0.0627872	0.171131	-0.233918	4.2366	23.4174	7.92399e-06	4.85401e-05	FALSE
chr14	17400407	17599934	0.538607	0.869169	-0.330562	3.28743	23.4021	7.97093e-06	4.88022e-05	FALSE
chr16	10400022	10599777	2.23289	1.98182	0.25107	4.66838	23.389	8.01125e-06	4.90235e-05	TRUE
chr7	129999977	130200157	-0.296312	-0.602369	0.306057	3.37653	23.3488	8.13647e-06	4.97638e-05	FALSE
chr12	41599866	41800136	-0.358652	-0.699382	0.34073	2.92367	23.3005	8.28938e-06	5.06727e-05	FALSE
chr7	108800207	109000193	1.09266	1.4648	-0.372134	2.84067	23.2925	8.31513e-06	5.08036e-05	FALSE
chr17	50799838	51000063	0.272339	0.512001	-0.239662	4.19523	23.2409	8.48241e-06	5.17987e-05	FALSE
chr14	70200066	70400104	-0.14931	-0.388205	0.238895	4.1109	23.2368	8.49594e-06	5.18544e-05	FALSE
chr9	108599934	108800082	-0.383308	-0.623772	0.240464	4.14095	23.1972	8.62697e-06	5.26268e-05	FALSE
chr14	48399354	48599855	-1.06706	-0.821196	-0.245861	4.13807	23.1899	8.65122e-06	5.27473e-05	TRUE
chr18	64999969	65200066	-0.360556	-0.117383	-0.243173	4.05343	23.1733	8.70694e-06	5.30595e-05	TRUE
chr4	70800289	70999936	0.0429843	0.458139	-0.415155	2.35912	23.1663	8.73062e-06	5.31762e-05	FALSE
chr12	36400010	36600642	-0.505151	-0.191702	-0.313448	3.11054	23.1553	8.76803e-06	5.33763e-05	TRUE
chr1	59799902	60000018	0.831012	1.09589	-0.264879	3.99706	23.1538	8.77287e-06	5.33781e-05	FALSE
chr10	51799356	52000019	-0.000985203	0.358653	-0.359638	2.70382	23.1338	8.84117e-06	5.37659e-05	FALSE
chr16	75599935	75799968	2.01459	2.39676	-0.382167	3.32673	23.1229	8.87835e-06	5.3964e-05	FALSE
chr11	117199961	117400075	-0.441204	-0.235311	-0.205893	4.72038	23.119	8.8918e-06	5.40178e-05	TRUE
chr9	55599598	55799865	0.584522	0.28518	0.299343	3.42414	23.0887	8.99667e-06	5.46266e-05	TRUE
chr3	55801044	55999968	-0.560035	-0.923608	0.363572	2.77005	23.0867	9.00381e-06	5.46417e-05	FALSE
chr12	76599907	76799379	-0.15176	0.0821803	-0.23394	4.16352	23.0843	9.01218e-06	5.46642e-05	TRUE
chr2	9400060	9599176	0.762905	0.529937	0.232969	4.33022	23.0722	9.05444e-06	5.48923e-05	TRUE
chr9	69200380	69400061	-0.194393	0.0225516	-0.216945	4.47438	23.0593	9.09958e-06	5.51374e-05	TRUE
chr5	72601340	72800349	0.379082	0.625196	-0.246114	4.04867	23.0317	9.19737e-06	5.57013e-05	FALSE
chr12	17200103	17399511	0.361587	0.0988205	0.262766	3.87462	23.0246	9.22276e-06	5.58262e-05	TRUE
chr18	15799653	16000389	-0.459939	-0.146303	-0.313636	3.10494	23.0099	9.27563e-06	5.61173e-05	TRUE
chrX	167000010	167199700	-1.03847	-1.36996	0.331489	3.13286	23.0069	9.28629e-06	5.61529e-05	FALSE
chr5	62799467	62999976	-1.296	-0.9518	-0.3442	3.03657	22.9967	9.32308e-06	5.63464e-05	TRUE
chr9	33399306	33599919	0.948308	1.35538	-0.407068	2.5243	22.9943	9.3318e-06	5.637e-05	FALSE
chr4	118799974	118999939	0.662241	0.351028	0.311214	3.25086	22.9683	9.42645e-06	5.69125e-05	TRUE
chr1	181800140	182000126	0.726976	0.486006	0.24097	4.166	22.9537	9.47981e-06	5.72052e-05	TRUE
chr11	111399806	111600349	0.335131	0.0201065	0.315025	3.1416	22.9413	9.52567e-06	5.74525e-05	TRUE
chr6	115800321	115999961	0.333661	0.105786	0.227875	4.25139	22.9218	9.59781e-06	5.78578e-05	TRUE
chr14	108000078	108200003	0.183537	-0.250184	0.433721	2.15569	22.9158	9.62035e-06	5.7964e-05	FALSE
chr8	117800041	118000537	-0.00710407	0.307336	-0.31444	3.23988	22.9144	9.62548e-06	5.79651e-05	FALSE
chr8	81800179	81999780	-0.794617	-1.1137	0.319084	3.37587	22.9019	9.67202e-06	5.82156e-05	FALSE
chr17	63800031	64000338	0.0251618	0.337709	-0.312547	3.10756	22.896	9.69444e-06	5.83206e-05	FALSE
chr15	92799793	92999110	-0.0869604	-0.428733	0.341773	2.84837	22.863	9.81916e-06	5.90406e-05	FALSE
chr13	80799759	81000182	1.92755	2.31277	-0.385221	3.24682	22.8583	9.83722e-06	5.9119e-05	FALSE
chr11	67399972	67600104	-0.508976	-0.203388	-0.305588	3.25764	22.8311	9.94181e-06	5.9717e-05	TRUE
chr10	60799990	60999696	0.0486498	0.315306	-0.266656	3.79054	22.8261	9.96119e-06	5.98028e-05	FALSE
chr13	105599929	105799805	0.0620696	0.450192	-0.388123	2.46281	22.8234	9.97143e-06	5.98336e-05	FALSE
chr16	70600009	70800260	-0.495781	-0.906567	0.410786	2.33296	22.8136	1.00096e-05	6.00321e-05	FALSE
chr12	111200055	111399895	-0.794589	-0.557331	-0.237258	4.27168	22.7825	1.01311e-05	6.073e-05	TRUE
chr12	119200371	119399994	-0.461741	-0.838819	0.377078	2.66667	22.7668	1.0193e-05	6.10695e-05	FALSE
chr7	111999961	112199072	1.03246	1.33955	-0.307087	3.58779	22.7646	1.02021e-05	6.10928e-05	FALSE
chr11	113599347	113800194	-0.665398	-0.435709	-0.229689	4.31621	22.756	1.0236e-05	6.12645e-05	TRUE
chr15	24999774	25200207	1.30195	0.986574	0.315375	3.45894	22.7388	1.03046e-05	6.16437e-05	TRUE
chr10	70400016	70600549	-0.274658	0.0283629	-0.303021	3.12871	22.7096	1.04223e-05	6.22671e-05	TRUE
chr5	25799818	25999737	-1.30455	-0.936177	-0.368376	2.84691	22.7083	1.04275e-05	6.22671e-05	TRUE
chr16	38600001	38800031	-1.48919	-1.79231	0.30312	3.73721	22.7082	1.0428e-05	6.22671e-05	FALSE
chr10	29399633	29600276	0.33586	0.712291	-0.376432	2.5871	22.7077	1.043e-05	6.22671e-05	FALSE
chr11	100999958	101199915	-1.09637	-0.885069	-0.211302	4.81399	22.7013	1.04561e-05	6.2391e-05	TRUE
chr3	60199957	60400079	0.700396	0.409386	0.291009	3.60385	22.6879	1.05108e-05	6.26858e-05	TRUE
chr10	18399471	18600688	0.893313	1.13547	-0.242156	4.21661	22.6861	1.05181e-05	6.26977e-05	FALSE
chr2	45000105	45200223	-0.956662	-1.23444	0.277775	3.8283	22.6562	1.06413e-05	6.33994e-05	FALSE
chr16	8399948	8600024	1.72822	2.0226	-0.294374	3.94268	22.6276	1.07605e-05	6.40776e-05	FALSE
chr4	116399908	116600093	-0.0625272	0.194078	-0.256606	3.86993	22.6224	1.07823e-05	6.41748e-05	FALSE
chr13	57599975	57799619	-0.377579	-0.678489	0.300911	3.34352	22.6203	1.0791e-05	6.41942e-05	FALSE
chr5	106000159	106199719	0.363273	0.75777	-0.394497	2.52021	22.6174	1.08031e-05	6.42331e-05	FALSE
chr19	13600001	13799828	0.00630573	-0.354221	0.360527	2.70075	22.607	1.08471e-05	6.4462e-05	FALSE
chr9	84200062	84400043	0.0680746	0.429412	-0.361337	2.7456	22.5968	1.089e-05	6.46846e-05	FALSE
chrX	42000011	42200644	1.12881	0.767586	0.361222	2.84687	22.5883	1.09265e-05	6.48686e-05	TRUE
chr2	15200200	15400015	-0.287891	0.0504555	-0.338347	2.84438	22.5765	1.09767e-05	6.51339e-05	TRUE
chr6	32199981	32399681	0.119332	0.380867	-0.261535	3.8488	22.5725	1.09938e-05	6.52022e-05	FALSE
chr5	64599739	64799539	-0.977014	-0.769967	-0.207047	4.75053	22.5697	1.10058e-05	6.52402e-05	TRUE
chr14	58999671	59200019	0.299923	-0.00313915	0.303062	3.25928	22.5579	1.10563e-05	6.55019e-05	TRUE
chr4	115600401	115799788	1.34473	1.02766	0.317068	3.3498	22.5568	1.10611e-05	6.55019e-05	TRUE
chr8	80999789	81199294	-0.639994	-0.31278	-0.327214	2.96984	22.5541	1.1073e-05	6.55379e-05	TRUE
chr11	98600230	98799549	-0.391942	-0.603224	0.211282	4.57407	22.5528	1.10783e-05	6.55379e-05	FALSE
chr16	14600049	14800105	0.108133	0.473548	-0.365415	2.62478	22.5492	1.10941e-05	6.55985e-05	FALSE
chr10	86599710	86799999	-0.416778	-0.736819	0.320041	3.11688	22.5461	1.11073e-05	6.56432e-05	FALSE
chr2	154400277	154600895	1.58157	1.31512	0.266447	4.03052	22.5078	1.12744e-05	6.6597e-05	TRUE
chr3	15199703	15399857	-0.818711	-1.17944	0.360728	2.84293	22.4798	1.13984e-05	6.72958e-05	FALSE
chr3	101399962	101599832	-0.0841464	-0.280716	0.19657	4.93483	22.4588	1.14923e-05	6.78159e-05	FALSE
chr3	59399514	59599678	-0.318528	-0.0133606	-0.305168	3.36212	22.4416	1.15696e-05	6.82381e-05	TRUE
chr10	60000003	60200062	-0.374049	-0.173001	-0.201049	4.77057	22.434	1.16038e-05	6.84051e-05	TRUE
chr5	145999928	146200200	0.927568	0.59742	0.330148	2.96302	22.4225	1.16561e-05	6.86793e-05	TRUE
chr17	63000296	63199966	0.50361	0.196511	0.307099	3.21291	22.3934	1.17891e-05	6.94281e-05	TRUE
chr3	51599635	51800260	0.750927	0.95625	-0.205324	4.8355	22.3803	1.18497e-05	6.97502e-05	FALSE
chr9	33000636	33199958	-2.71658	-3.05337	0.336783	4.10947	22.3732	1.18827e-05	6.9909e-05	FALSE
chr5	75200061	75399791	0.646295	0.373966	0.272329	3.74992	22.3045	1.2206e-05	7.17754e-05	TRUE
chr13	49799914	50000159	-0.311559	0.10376	-0.415318	2.14539	22.2812	1.23177e-05	7.23959e-05	TRUE
chr8	48600269	48799922	-0.0986986	0.246679	-0.345377	2.74597	22.2763	1.23411e-05	7.24969e-05	FALSE
[truncated: 3,175 more rows]
